# Supplementary material for: Comparative Analysis of Gene Correlation Networks of Breast Cancer Patients Based on Mutations in TP53
Source: Biomolecules. 2022 Jul 13;12(7):979. doi: 10.3390/biom12070979 (PMC9313229; doi:10.3390/biom12070979)
Supplement: Supplementary file 1 [file biomolecules-12-00979-s001.zip]

Archive with 10 entries (10 files):
- Supplementary Materials S1.csv
- Supplementary Materials S2.xlsx
- Supplementary Materials S3.csv
- Supplementary Materials S4.csv
- Supplementary Materials S5.csv
- Supplementary Materials S6.csv
- Supplementary Materials S7.pdf
- Supplementary Materials S7.xlsx
- Supplementary Materials S8.xlsx
- Supplementary Materials S9.xlsx
