# Supplementary material for: Comparative Analysis of Gene Correlation Networks of Breast Cancer Patients Based on Mutations in TP53
Source: Biomolecules. 2022 Jul 13;12(7):979. doi: 10.3390/biom12070979 (PMC9313229; doi:10.3390/biom12070979)
Supplement: Supplementary file 1 [file biomolecules-12-00979-s001.zip › Supplementary Materials S1.csv]

case_barcode	age_at_diagnosis	subtype	sex	event	duration	sample	TP53
TCGA-3C-AAAU	55	LumA	0	0	134.9	TCGA-3C-AAAU-01	wtTP53
TCGA-3C-AALI	50	Her2	0	0	133.5	TCGA-3C-AALI-01	mTP53
TCGA-3C-AALJ	62	LumB	0	0	49.1333333333333	TCGA-3C-AALJ-01	wtTP53
TCGA-3C-AALK	52	LumA	0	0	48.2666666666667	TCGA-3C-AALK-01	wtTP53
TCGA-4H-AAAK	50	LumA	0	0	11.6	TCGA-4H-AAAK-01	wtTP53
TCGA-5L-AAT0	42	LumA	0	0	49.2333333333333	TCGA-5L-AAT0-01	wtTP53
TCGA-5L-AAT1	63	LumA	0	0	49.0333333333333	TCGA-5L-AAT1-01	wtTP53
TCGA-5T-A9QA	52	LumB	0	0	10.1	TCGA-5T-A9QA-01	wtTP53
TCGA-A1-A0SD	59	LumA	0	0	14.5666666666667	TCGA-A1-A0SD-01	wtTP53
TCGA-A1-A0SE	56	LumA	0	0	44.0333333333333	TCGA-A1-A0SE-01	wtTP53
TCGA-A1-A0SF	54	LumA	0	0	48.7666666666667	TCGA-A1-A0SF-01	wtTP53
TCGA-A1-A0SG	61	LumA	0	0	14.4666666666667	TCGA-A1-A0SG-01	wtTP53
TCGA-A1-A0SH	39	LumA	0	0	47.9	TCGA-A1-A0SH-01	wtTP53
TCGA-A1-A0SI	52	LumB	0	0	21.1666666666667	TCGA-A1-A0SI-01	mTP53
TCGA-A1-A0SJ	39	LumA	0	0	13.8666666666667	TCGA-A1-A0SJ-01	wtTP53
TCGA-A1-A0SK	54	Basal	0	1	32.2333333333333	TCGA-A1-A0SK-01	mTP53
TCGA-A1-A0SM	77	LumA	1	0	8.06666666666667	TCGA-A1-A0SM-01	wtTP53
TCGA-A1-A0SN	50	LumB	0	0	39.8666666666667	TCGA-A1-A0SN-01	wtTP53
TCGA-A1-A0SO	67	Basal	0	0	28.4	TCGA-A1-A0SO-01	mTP53
TCGA-A1-A0SP	40	Basal	0	0	19.4666666666667	TCGA-A1-A0SP-01	mTP53
TCGA-A2-A04N	66	LumA	0	0	145.133333333333	TCGA-A2-A04N-01	wtTP53
TCGA-A2-A04R	36	LumB	0	0	123.633333333333	TCGA-A2-A04R-01	wtTP53
TCGA-A2-A04U	47	Basal	0	0	88.4666666666667	TCGA-A2-A04U-01	mTP53
TCGA-A2-A04W	50	Her2	0	0	103.4	TCGA-A2-A04W-01	mTP53
TCGA-A2-A0CK	60	LumA	0	0	138.633333333333	TCGA-A2-A0CK-01	wtTP53
TCGA-A2-A0CR	54	LumA	0	0	109.433333333333	TCGA-A2-A0CR-01	wtTP53
TCGA-A2-A0CS	73	LumA	0	1	78.2666666666667	TCGA-A2-A0CS-01	wtTP53
TCGA-A2-A0CV	41	LumA	0	0	100.366666666667	TCGA-A2-A0CV-01	wtTP53
TCGA-A2-A0CW	67	LumB	0	0	109.433333333333	TCGA-A2-A0CW-01	mTP53
TCGA-A2-A0D3	42	LumA	0	0	62.4333333333333	TCGA-A2-A0D3-01	wtTP53
TCGA-A2-A0EN	70	LumA	0	0	90.6	TCGA-A2-A0EN-01	wtTP53
TCGA-A2-A0EP	56	LumA	0	0	120.1	TCGA-A2-A0EP-01	wtTP53
TCGA-A2-A0ES	52	LumA	0	0	73	TCGA-A2-A0ES-01	wtTP53
TCGA-A2-A0EW	53	LumA	0	1	62.8	TCGA-A2-A0EW-01	wtTP53
TCGA-A2-A0ST	62	Basal	0	0	100.566666666667	TCGA-A2-A0ST-01	mTP53
TCGA-A2-A0SU	66	LumA	0	0	55.4	TCGA-A2-A0SU-01	wtTP53
TCGA-A2-A0SX	48	Basal	0	0	51.1333333333333	TCGA-A2-A0SX-01	mTP53
TCGA-A2-A0SY	62	LumA	0	0	44.9	TCGA-A2-A0SY-01	wtTP53
TCGA-A2-A0T0	59	Basal	0	0	17.7666666666667	TCGA-A2-A0T0-01	wtTP53
TCGA-A2-A0T1	55	Her2	0	0	17.3666666666667	TCGA-A2-A0T1-01	mTP53
TCGA-A2-A0T3	37	LumB	0	0	50.5333333333333	TCGA-A2-A0T3-01	mTP53
TCGA-A2-A0T4	62	LumA	0	0	20.8	TCGA-A2-A0T4-01	wtTP53
TCGA-A2-A0T5	39	LumA	0	0	17.7	TCGA-A2-A0T5-01	wtTP53
TCGA-A2-A0T6	50	LumA	0	0	19.1666666666667	TCGA-A2-A0T6-01	wtTP53
TCGA-A2-A0T7	51	LumA	0	0	21.0333333333333	TCGA-A2-A0T7-01	wtTP53
TCGA-A2-A0YC	59	LumA	0	0	33	TCGA-A2-A0YC-01	wtTP53
TCGA-A2-A0YD	63	LumA	0	0	25.6333333333333	TCGA-A2-A0YD-01	wtTP53
TCGA-A2-A0YE	48	Basal	0	0	18.4666666666667	TCGA-A2-A0YE-01	mTP53
TCGA-A2-A0YF	67	LumA	0	0	51.1666666666667	TCGA-A2-A0YF-01	wtTP53
TCGA-A2-A0YG	63	LumB	0	0	22.2	TCGA-A2-A0YG-01	mTP53
TCGA-A2-A0YH	53	LumB	0	0	21.9666666666667	TCGA-A2-A0YH-01	mTP53
TCGA-A2-A0YI	62	LumA	0	0	50.1666666666667	TCGA-A2-A0YI-01	wtTP53
TCGA-A2-A0YJ	39	Basal	0	0	18.8666666666667	TCGA-A2-A0YJ-01	mTP53
TCGA-A2-A0YL	48	LumA	0	0	49.1333333333333	TCGA-A2-A0YL-01	wtTP53
TCGA-A2-A0YM	67	Basal	0	0	32.1666666666667	TCGA-A2-A0YM-01	mTP53
TCGA-A2-A0YT	56	LumB	0	1	24.1	TCGA-A2-A0YT-01	mTP53
TCGA-A2-A1FV	74	LumA	0	0	23.8	TCGA-A2-A1FV-01	wtTP53
TCGA-A2-A1FW	62	LumB	0	0	17.6	TCGA-A2-A1FW-01	wtTP53
TCGA-A2-A1FX	61	LumB	0	0	61.5666666666667	TCGA-A2-A1FX-01	wtTP53
TCGA-A2-A1FZ	63	LumA	0	0	22.7666666666667	TCGA-A2-A1FZ-01	wtTP53
TCGA-A2-A1G0	49	LumA	0	0	20.5333333333333	TCGA-A2-A1G0-01	wtTP53
TCGA-A2-A1G1	85	Basal	0	0	19.4666666666667	TCGA-A2-A1G1-01	mTP53
TCGA-A2-A259	70	LumA	0	0	53.2	TCGA-A2-A259-01	wtTP53
TCGA-A2-A25B	39	LumB	0	0	43.0333333333333	TCGA-A2-A25B-01	wtTP53
TCGA-A2-A25C	50	LumB	0	0	17.4333333333333	TCGA-A2-A25C-01	wtTP53
TCGA-A2-A25D	90	LumA	0	0	18.4	TCGA-A2-A25D-01	wtTP53
TCGA-A2-A25E	34	LumB	0	0	106.8	TCGA-A2-A25E-01	wtTP53
TCGA-A2-A25F	66	Basal	0	0	10.7333333333333	TCGA-A2-A25F-01	wtTP53
TCGA-A2-A3KD	47	LumA	0	0	40.2	TCGA-A2-A3KD-01	wtTP53
TCGA-A2-A3XT	45	Basal	0	0	92.3333333333333	TCGA-A2-A3XT-01	mTP53
TCGA-A2-A3XU	35	Basal	0	1	30.4	TCGA-A2-A3XU-01	wtTP53
TCGA-A2-A3XV	46	Her2	0	0	33.2	TCGA-A2-A3XV-01	mTP53
TCGA-A2-A3XX	49	Basal	0	1	47.9666666666667	TCGA-A2-A3XX-01	mTP53
TCGA-A2-A3XZ	46	Her2	0	0	51.0666666666667	TCGA-A2-A3XZ-01	wtTP53
TCGA-A2-A3Y0	57	Basal	0	0	51.5333333333333	TCGA-A2-A3Y0-01	mTP53
TCGA-A2-A4S1	66	Basal	0	0	27.3333333333333	TCGA-A2-A4S1-01	mTP53
TCGA-A2-A4S2	62	LumA	0	0	21.4333333333333	TCGA-A2-A4S2-01	wtTP53
TCGA-A2-A4S3	59	LumB	0	0	22.2	TCGA-A2-A4S3-01	mTP53
TCGA-A7-A0CE	57	Basal	0	0	35.8	TCGA-A7-A0CE-01	wtTP53
TCGA-A7-A0CH	79	LumA	0	0	35.9666666666667	TCGA-A7-A0CH-01	wtTP53
TCGA-A7-A0D9	37	LumA	0	0	37.9666666666667	TCGA-A7-A0D9-01	wtTP53
TCGA-A7-A0DA	62	Basal	0	0	36.1666666666667	TCGA-A7-A0DA-01	mTP53
TCGA-A7-A0DB	56	LumA	0	0	33.5666666666667	TCGA-A7-A0DB-01	wtTP53
TCGA-A7-A13D	46	Basal	0	0	32.1666666666667	TCGA-A7-A13D-01	mTP53
TCGA-A7-A13E	62	Basal	0	1	20.4666666666667	TCGA-A7-A13E-01	mTP53
TCGA-A7-A13F	44	LumB	0	0	25.5	TCGA-A7-A13F-01	wtTP53
TCGA-A7-A13G	79	LumA	0	0	23.9333333333333	TCGA-A7-A13G-01	wtTP53
TCGA-A7-A26E	71	LumA	0	0	31.8	TCGA-A7-A26E-01	wtTP53
TCGA-A7-A26F	55	Basal	0	0	24.6	TCGA-A7-A26F-01	mTP53
TCGA-A7-A26G	50	Basal	0	0	24.0666666666667	TCGA-A7-A26G-01	mTP53
TCGA-A7-A26H	72	LumA	0	0	24.1333333333333	TCGA-A7-A26H-01	wtTP53
TCGA-A7-A26I	65	Basal	0	0	22.0333333333333	TCGA-A7-A26I-01	mTP53
TCGA-A7-A26J	49	LumA	0	0	20.9	TCGA-A7-A26J-01	wtTP53
TCGA-A7-A2KD	53	LumB	0	0	22.6333333333333	TCGA-A7-A2KD-01	mTP53
TCGA-A7-A3RF	79	LumA	0	0	13.6	TCGA-A7-A3RF-01	wtTP53
TCGA-A7-A425	70	LumA	0	0	14.9	TCGA-A7-A425-01	wtTP53
TCGA-A7-A4SC	62	LumA	0	0	14.8666666666667	TCGA-A7-A4SC-01	wtTP53
TCGA-A7-A4SD	52	Basal	0	0	14.7	TCGA-A7-A4SD-01	mTP53
TCGA-A7-A4SE	54	Basal	0	0	21.4666666666667	TCGA-A7-A4SE-01	mTP53
TCGA-A7-A56D	84	LumA	0	0	14.9333333333333	TCGA-A7-A56D-01	mTP53
TCGA-A7-A5ZV	62	Basal	0	0	12.2666666666667	TCGA-A7-A5ZV-01	mTP53
TCGA-A7-A5ZW	47	LumA	0	0	10.8666666666667	TCGA-A7-A5ZW-01	wtTP53
TCGA-A7-A5ZX	48	LumA	0	0	11.2	TCGA-A7-A5ZX-01	wtTP53
TCGA-A7-A6VV	51	Basal	0	0	10.4333333333333	TCGA-A7-A6VV-01	mTP53
TCGA-A7-A6VW	48	Basal	0	0	9.5	TCGA-A7-A6VW-01	mTP53
TCGA-A7-A6VX	68	LumB	0	0	10.5666666666667	TCGA-A7-A6VX-01	mTP53
TCGA-A7-A6VY	48	Basal	0	0	8.86666666666667	TCGA-A7-A6VY-01	mTP53
TCGA-A8-A075	42	LumB	0	0	17.2666666666667	TCGA-A8-A075-01	mTP53
TCGA-AC-A23C	62	LumA	0	0	19.5	TCGA-AC-A23C-01	mTP53
TCGA-AC-A23E	50	LumA	0	0	23.2666666666667	TCGA-AC-A23E-01	wtTP53
TCGA-AC-A23H	90	Her2	0	1	5.8	TCGA-AC-A23H-01	wtTP53
TCGA-AC-A2B8	84	LumA	0	0	22.5666666666667	TCGA-AC-A2B8-01	wtTP53
TCGA-AC-A2BK	78	Basal	0	0	74.0666666666667	TCGA-AC-A2BK-01	mTP53
TCGA-AC-A2BM	41	LumB	0	0	100.733333333333	TCGA-AC-A2BM-01	wtTP53
TCGA-AC-A2FB	65	LumA	0	0	41.1333333333333	TCGA-AC-A2FB-01	wtTP53
TCGA-AC-A2FF	40	LumA	0	0	91.9666666666667	TCGA-AC-A2FF-01	wtTP53
TCGA-AC-A2FG	79	LumA	0	0	61.7666666666667	TCGA-AC-A2FG-01	wtTP53
TCGA-AC-A2FO	65	LumA	0	0	75.1666666666667	TCGA-AC-A2FO-01	wtTP53
TCGA-AC-A2QH	58	Basal	0	0	33.5	TCGA-AC-A2QH-01	mTP53
TCGA-AC-A3HN	87	LumA	0	0	16.5333333333333	TCGA-AC-A3HN-01	wtTP53
TCGA-AC-A3OD	68	LumA	0	0	15.0333333333333	TCGA-AC-A3OD-01	mTP53
TCGA-AC-A3QP	79	LumA	0	0	22.5	TCGA-AC-A3QP-01	wtTP53
TCGA-AC-A3QQ	54	LumA	0	0	24.4666666666667	TCGA-AC-A3QQ-01	wtTP53
TCGA-AC-A3W5	65	Her2	0	0	16.8	TCGA-AC-A3W5-01	wtTP53
TCGA-AC-A3YJ	66	LumA	0	0	25.1333333333333	TCGA-AC-A3YJ-01	wtTP53
TCGA-AC-A4ZE	63	LumA	0	0	29.6666666666667	TCGA-AC-A4ZE-01	wtTP53
TCGA-AC-A5EH	76	Her2	0	0	17.0333333333333	TCGA-AC-A5EH-01	mTP53
TCGA-AC-A5XS	74	LumA	0	0	19.6	TCGA-AC-A5XS-01	wtTP53
TCGA-AC-A5XU	74	LumA	0	0	15.1666666666667	TCGA-AC-A5XU-01	mTP53
TCGA-AC-A62V	58	LumB	1	1	11.6	TCGA-AC-A62V-01	wtTP53
TCGA-AC-A62X	72	Basal	0	0	13.9	TCGA-AC-A62X-01	mTP53
TCGA-AC-A62Y	79	LumA	0	0	17.6666666666667	TCGA-AC-A62Y-01	wtTP53
TCGA-AC-A6IV	47	LumA	0	0	18.9333333333333	TCGA-AC-A6IV-01	wtTP53
TCGA-AC-A6IW	73	Basal	0	0	13.7666666666667	TCGA-AC-A6IW-01	mTP53
TCGA-AC-A6IX	49	LumA	0	0	12.4333333333333	TCGA-AC-A6IX-01	wtTP53
TCGA-AC-A6NO	43	LumA	0	0	1.7	TCGA-AC-A6NO-01	wtTP53
TCGA-AC-A7VB	51	LumB	0	0	8.33333333333333	TCGA-AC-A7VB-01	wtTP53
TCGA-AC-A7VC	56	Basal	0	0	0.0333333333333333	TCGA-AC-A7VC-01	mTP53
TCGA-AC-A8OP	72	LumA	0	0	20.4666666666667	TCGA-AC-A8OP-01	wtTP53
TCGA-AC-A8OQ	72	Basal	0	0	1.13333333333333	TCGA-AC-A8OQ-01	mTP53
TCGA-AC-A8OR	75	LumA	0	0	1.33333333333333	TCGA-AC-A8OR-01	wtTP53
TCGA-AC-A8OS	71	LumA	0	0	2.33333333333333	TCGA-AC-A8OS-01	wtTP53
TCGA-AN-A0XL	61	LumA	0	0	5.43333333333333	TCGA-AN-A0XL-01	wtTP53
TCGA-AN-A0XN	68	LumA	0	0	0.333333333333333	TCGA-AN-A0XN-01	mTP53
TCGA-AN-A0XO	59	LumA	0	0	12.5	TCGA-AN-A0XO-01	wtTP53
TCGA-AN-A0XP	69	LumA	0	0	0.3	TCGA-AN-A0XP-01	wtTP53
TCGA-AN-A0XR	55	LumB	0	0	0.333333333333333	TCGA-AN-A0XR-01	wtTP53
TCGA-AN-A0XS	63	LumA	0	0	0.333333333333333	TCGA-AN-A0XS-01	wtTP53
TCGA-AN-A0XT	54	LumA	0	0	0.333333333333333	TCGA-AN-A0XT-01	mTP53
TCGA-AN-A0XU	54	Basal	0	0	0.333333333333333	TCGA-AN-A0XU-01	mTP53
TCGA-AN-A0XV	67	LumA	0	0	5.4	TCGA-AN-A0XV-01	wtTP53
TCGA-AN-A0XW	36	LumA	0	0	5.66666666666667	TCGA-AN-A0XW-01	wtTP53
TCGA-AO-A03M	29	LumA	0	0	62.2	TCGA-AO-A03M-01	wtTP53
TCGA-AO-A03N	59	LumB	0	0	67.7	TCGA-AO-A03N-01	mTP53
TCGA-AO-A03V	41	LumA	0	0	45.0333333333333	TCGA-AO-A03V-01	mTP53
TCGA-AO-A0JG	49	LumA	0	0	26.6	TCGA-AO-A0JG-01	wtTP53
TCGA-AO-A124	38	Basal	0	0	116.866666666667	TCGA-AO-A124-01	mTP53
TCGA-AO-A125	72	LumA	0	0	115.2	TCGA-AO-A125-01	wtTP53
TCGA-AO-A126	39	LumA	0	0	110.233333333333	TCGA-AO-A126-01	wtTP53
TCGA-AO-A128	61	Basal	0	0	108.266666666667	TCGA-AO-A128-01	mTP53
TCGA-AO-A129	29	Basal	0	0	109.533333333333	TCGA-AO-A129-01	mTP53
TCGA-AO-A12A	47	LumA	0	0	103.733333333333	TCGA-AO-A12A-01	wtTP53
TCGA-AO-A12B	63	LumA	0	0	99.6333333333333	TCGA-AO-A12B-01	wtTP53
TCGA-AO-A12D	43	Her2	0	0	83.8333333333333	TCGA-AO-A12D-01	mTP53
TCGA-AO-A12E	51	LumA	0	0	71.4	TCGA-AO-A12E-01	wtTP53
TCGA-AO-A12F	36	Basal	0	0	61.4	TCGA-AO-A12F-01	wtTP53
TCGA-AO-A12G	75	LumA	0	0	54.6333333333333	TCGA-AO-A12G-01	mTP53
TCGA-AO-A12H	69	LumA	0	0	41.1333333333333	TCGA-AO-A12H-01	wtTP53
TCGA-AO-A1KR	51	Basal	0	0	83.7666666666667	TCGA-AO-A1KR-01	wtTP53
TCGA-AO-A1KT	78	LumB	0	0	18.0333333333333	TCGA-AO-A1KT-01	wtTP53
TCGA-AQ-A04H	61	LumB	0	0	25.1333333333333	TCGA-AQ-A04H-01	mTP53
TCGA-AQ-A0Y5	70	LumA	0	1	5.73333333333333	TCGA-AQ-A0Y5-01	wtTP53
TCGA-AQ-A1H2	84	LumA	0	0	15.8333333333333	TCGA-AQ-A1H2-01	wtTP53
TCGA-AQ-A1H3	49	LumA	0	0	32.9666666666667	TCGA-AQ-A1H3-01	wtTP53
TCGA-AQ-A54O	51	LumB	1	0	33.3666666666667	TCGA-AQ-A54O-01	wtTP53
TCGA-AQ-A7U7	55	LumA	0	1	19.4666666666667	TCGA-AQ-A7U7-01	wtTP53
TCGA-AR-A0TP	43	Basal	0	0	142.5	TCGA-AR-A0TP-01	mTP53
TCGA-AR-A0TQ	27	LumB	0	0	99.7	TCGA-AR-A0TQ-01	wtTP53
TCGA-AR-A0TR	68	LumA	0	1	5.33333333333333	TCGA-AR-A0TR-01	wtTP53
TCGA-AR-A0TS	46	Basal	0	0	85.2666666666667	TCGA-AR-A0TS-01	mTP53
TCGA-AR-A0TT	53	LumB	0	0	110.533333333333	TCGA-AR-A0TT-01	wtTP53
TCGA-AR-A0TU	35	Basal	0	0	23.6333333333333	TCGA-AR-A0TU-01	wtTP53
TCGA-AR-A0TV	66	LumB	0	0	76.2666666666667	TCGA-AR-A0TV-01	mTP53
TCGA-AR-A0TW	50	LumA	0	0	100.3	TCGA-AR-A0TW-01	wtTP53
TCGA-AR-A0TX	64	Her2	0	0	65.7333333333333	TCGA-AR-A0TX-01	mTP53
TCGA-AR-A0TZ	43	LumA	0	1	108.733333333333	TCGA-AR-A0TZ-01	wtTP53
TCGA-AR-A0U0	73	Basal	0	0	66.2666666666667	TCGA-AR-A0U0-01	mTP53
TCGA-AR-A0U2	47	LumB	0	1	85.0333333333333	TCGA-AR-A0U2-01	mTP53
TCGA-AR-A0U3	59	LumA	0	0	136	TCGA-AR-A0U3-01	wtTP53
TCGA-AR-A0U4	54	Basal	0	0	108.7	TCGA-AR-A0U4-01	mTP53
TCGA-AR-A1AH	51	Basal	0	0	126.9	TCGA-AR-A1AH-01	mTP53
TCGA-AR-A1AI	47	Basal	0	0	109.866666666667	TCGA-AR-A1AI-01	mTP53
TCGA-AR-A1AJ	83	Basal	0	0	102.4	TCGA-AR-A1AJ-01	mTP53
TCGA-AR-A1AK	70	LumA	0	0	105.3	TCGA-AR-A1AK-01	wtTP53
TCGA-AR-A1AL	60	LumA	0	0	99.0333333333333	TCGA-AR-A1AL-01	wtTP53
TCGA-AR-A1AN	46	LumA	0	0	97.3333333333333	TCGA-AR-A1AN-01	mTP53
TCGA-AR-A1AP	80	LumA	0	0	95.2	TCGA-AR-A1AP-01	mTP53
TCGA-AR-A1AQ	49	Basal	0	0	100.7	TCGA-AR-A1AQ-01	mTP53
TCGA-AR-A1AR	50	Basal	0	1	17.4666666666667	TCGA-AR-A1AR-01	mTP53
TCGA-AR-A1AS	54	LumA	0	0	38.3333333333333	TCGA-AR-A1AS-01	mTP53
TCGA-AR-A1AT	62	Her2	0	1	42.4	TCGA-AR-A1AT-01	wtTP53
TCGA-AR-A1AU	39	LumA	0	0	95.6	TCGA-AR-A1AU-01	wtTP53
TCGA-AR-A1AV	68	LumA	1	0	62.1333333333333	TCGA-AR-A1AV-01	wtTP53
TCGA-AR-A1AW	65	LumB	0	0	87.7333333333333	TCGA-AR-A1AW-01	mTP53
TCGA-AR-A1AX	64	LumA	0	0	87.6333333333333	TCGA-AR-A1AX-01	mTP53
TCGA-AR-A1AY	65	Basal	0	0	34.2	TCGA-AR-A1AY-01	mTP53
TCGA-AR-A24H	65	LumB	0	0	163.133333333333	TCGA-AR-A24H-01	wtTP53
TCGA-AR-A24K	46	LumB	0	0	51.6	TCGA-AR-A24K-01	mTP53
TCGA-AR-A24L	26	LumA	0	1	95.5333333333333	TCGA-AR-A24L-01	wtTP53
TCGA-AR-A24M	38	LumA	0	0	122	TCGA-AR-A24M-01	wtTP53
TCGA-AR-A24N	54	LumB	0	0	101.166666666667	TCGA-AR-A24N-01	wtTP53
TCGA-AR-A24O	43	LumA	0	0	120.233333333333	TCGA-AR-A24O-01	wtTP53
TCGA-AR-A24P	47	LumA	0	0	2.8	TCGA-AR-A24P-01	mTP53
TCGA-AR-A24Q	49	Basal	0	0	105.733333333333	TCGA-AR-A24Q-01	mTP53
TCGA-AR-A24R	45	LumB	0	0	114.333333333333	TCGA-AR-A24R-01	wtTP53
TCGA-AR-A24S	61	LumB	0	0	99.2	TCGA-AR-A24S-01	mTP53
TCGA-AR-A24T	46	LumA	0	0	106.733333333333	TCGA-AR-A24T-01	mTP53
TCGA-AR-A24U	47	Her2	0	0	104.266666666667	TCGA-AR-A24U-01	mTP53
TCGA-AR-A24V	52	LumA	0	0	106.766666666667	TCGA-AR-A24V-01	wtTP53
TCGA-AR-A24W	55	LumA	0	0	33.0333333333333	TCGA-AR-A24W-01	wtTP53
TCGA-AR-A24X	52	LumA	0	0	100.133333333333	TCGA-AR-A24X-01	wtTP53
TCGA-AR-A24Z	57	LumB	0	0	100.033333333333	TCGA-AR-A24Z-01	wtTP53
TCGA-AR-A250	58	LumB	0	0	90.2333333333333	TCGA-AR-A250-01	wtTP53
TCGA-AR-A251	51	Basal	0	0	101	TCGA-AR-A251-01	mTP53
TCGA-AR-A252	50	LumA	0	0	94.6	TCGA-AR-A252-01	wtTP53
TCGA-AR-A254	50	Her2	0	0	86.8333333333333	TCGA-AR-A254-01	mTP53
TCGA-AR-A255	62	LumA	0	0	72.0333333333333	TCGA-AR-A255-01	wtTP53
TCGA-AR-A256	45	Basal	0	1	95.1333333333333	TCGA-AR-A256-01	mTP53
TCGA-AR-A2LE	69	LumA	0	0	168.733333333333	TCGA-AR-A2LE-01	wtTP53
TCGA-AR-A2LK	62	LumB	0	1	54.9666666666667	TCGA-AR-A2LK-01	wtTP53
TCGA-AR-A2LL	70	LumB	0	0	67.0666666666667	TCGA-AR-A2LL-01	wtTP53
TCGA-AR-A2LM	49	LumA	0	0	64.5	TCGA-AR-A2LM-01	wtTP53
TCGA-AR-A2LN	65	LumA	0	0	38.7	TCGA-AR-A2LN-01	wtTP53
TCGA-AR-A2LO	46	LumA	0	0	39.9333333333333	TCGA-AR-A2LO-01	wtTP53
TCGA-AR-A2LR	49	Basal	0	0	58.0666666666667	TCGA-AR-A2LR-01	mTP53
TCGA-AR-A5QM	62	LumA	0	0	74.3666666666667	TCGA-AR-A5QM-01	wtTP53
TCGA-AR-A5QN	68	LumA	0	0	33.7666666666667	TCGA-AR-A5QN-01	wtTP53
TCGA-AR-A5QP	54	LumA	0	0	39.5	TCGA-AR-A5QP-01	wtTP53
TCGA-AR-A5QQ	68	Basal	0	1	10.7333333333333	TCGA-AR-A5QQ-01	mTP53
TCGA-B6-A0I1	73	Basal	0	1	78.7	TCGA-B6-A0I1-01	mTP53
TCGA-B6-A0IH	81	LumA	0	1	113.933333333333	TCGA-B6-A0IH-01	wtTP53
TCGA-B6-A0RH	51	Her2	0	1	215.2	TCGA-B6-A0RH-01	mTP53
TCGA-B6-A0RL	60	LumB	0	1	82.3	TCGA-B6-A0RL-01	wtTP53
TCGA-B6-A0RM	57	LumA	0	1	79.1	TCGA-B6-A0RM-01	wtTP53
TCGA-B6-A0RN	60	LumA	0	0	266.933333333333	TCGA-B6-A0RN-01	wtTP53
TCGA-B6-A0RO	71	LumA	0	0	164.3	TCGA-B6-A0RO-01	wtTP53
TCGA-B6-A0RP	73	LumA	0	1	104.2	TCGA-B6-A0RP-01	wtTP53
TCGA-B6-A0RT	39	Basal	0	0	90.7	TCGA-B6-A0RT-01	wtTP53
TCGA-B6-A0RU	40	Basal	0	0	286.833333333333	TCGA-B6-A0RU-01	mTP53
TCGA-B6-A0RV	42	LumA	0	0	171.866666666667	TCGA-B6-A0RV-01	wtTP53
TCGA-B6-A0WS	58	LumA	0	1	98.8333333333333	TCGA-B6-A0WS-01	wtTP53
TCGA-B6-A0WT	61	LumA	0	0	191.3	TCGA-B6-A0WT-01	wtTP53
TCGA-B6-A0WV	67	LumB	0	1	80.5666666666667	TCGA-B6-A0WV-01	wtTP53
TCGA-B6-A0WW	58	LumB	0	1	18.6	TCGA-B6-A0WW-01	wtTP53
TCGA-B6-A0WX	40	Basal	0	1	21.3	TCGA-B6-A0WX-01	mTP53
TCGA-B6-A0WY	40	LumA	0	1	115.366666666667	TCGA-B6-A0WY-01	wtTP53
TCGA-B6-A0WZ	50	LumA	0	0	209.733333333333	TCGA-B6-A0WZ-01	wtTP53
TCGA-B6-A0X0	54	LumA	0	1	131.5	TCGA-B6-A0X0-01	wtTP53
TCGA-B6-A0X1	48	Basal	0	1	248.5	TCGA-B6-A0X1-01	mTP53
TCGA-B6-A0X4	62	LumA	0	1	28.6666666666667	TCGA-B6-A0X4-01	wtTP53
TCGA-B6-A0X5	61	LumB	0	1	69.9	TCGA-B6-A0X5-01	wtTP53
TCGA-B6-A0X7	62	LumA	0	1	59.3666666666667	TCGA-B6-A0X7-01	wtTP53
TCGA-B6-A1KN	57	LumB	0	0	141.1	TCGA-B6-A1KN-01	mTP53
TCGA-B6-A2IU	62	LumA	0	0	172.533333333333	TCGA-B6-A2IU-01	wtTP53
TCGA-B6-A401	47	LumA	0	0	86.5333333333333	TCGA-B6-A401-01	mTP53
TCGA-B6-A409	44	Basal	0	1	19.1	TCGA-B6-A409-01	mTP53
TCGA-B6-A40B	76	LumA	0	0	105.066666666667	TCGA-B6-A40B-01	wtTP53
TCGA-B6-A40C	51	LumA	0	0	72.1333333333333	TCGA-B6-A40C-01	wtTP53
TCGA-BH-A0AU	45	LumB	0	0	63.8	TCGA-BH-A0AU-01	wtTP53
TCGA-BH-A0AV	52	Basal	0	0	60.6666666666667	TCGA-BH-A0AV-01	mTP53
TCGA-BH-A0AZ	47	LumA	0	0	63.9666666666667	TCGA-BH-A0AZ-01	wtTP53
TCGA-BH-A0B0	56	LumA	0	0	82.5666666666667	TCGA-BH-A0B0-01	mTP53
TCGA-BH-A0B3	53	Basal	0	0	40.1	TCGA-BH-A0B3-01	wtTP53
TCGA-BH-A0B6	47	LumA	0	0	82.7666666666667	TCGA-BH-A0B6-01	wtTP53
TCGA-BH-A0B7	42	Her2	0	0	85.3	TCGA-BH-A0B7-01	mTP53
TCGA-BH-A0B8	64	LumA	0	0	52.3	TCGA-BH-A0B8-01	wtTP53
TCGA-BH-A0BA	51	LumA	0	0	37.7333333333333	TCGA-BH-A0BA-01	wtTP53
TCGA-BH-A0BC	60	LumA	0	0	32.4666666666667	TCGA-BH-A0BC-01	mTP53
TCGA-BH-A0BF	56	LumB	0	1	44.1333333333333	TCGA-BH-A0BF-01	mTP53
TCGA-BH-A0BG	73	Basal	0	0	62.3666666666667	TCGA-BH-A0BG-01	mTP53
TCGA-BH-A0BJ	41	LumA	0	0	22	TCGA-BH-A0BJ-01	wtTP53
TCGA-BH-A0BL	35	Basal	0	0	75.9333333333333	TCGA-BH-A0BL-01	mTP53
TCGA-BH-A0BM	54	LumA	0	0	62.5333333333333	TCGA-BH-A0BM-01	wtTP53
TCGA-BH-A0BO	54	LumA	0	0	73.2333333333333	TCGA-BH-A0BO-01	wtTP53
TCGA-BH-A0BP	76	LumA	0	1	76.5333333333333	TCGA-BH-A0BP-01	mTP53
TCGA-BH-A0BQ	39	LumA	0	0	75.1666666666667	TCGA-BH-A0BQ-01	wtTP53
TCGA-BH-A0BS	55	LumA	0	0	87.0666666666667	TCGA-BH-A0BS-01	wtTP53
TCGA-BH-A0BT	56	LumA	0	0	78.8333333333333	TCGA-BH-A0BT-01	mTP53
TCGA-BH-A0BV	78	LumA	0	0	50.6333333333333	TCGA-BH-A0BV-01	wtTP53
TCGA-BH-A0BW	71	Basal	0	0	79.0333333333333	TCGA-BH-A0BW-01	mTP53
TCGA-BH-A0BZ	59	LumB	0	0	75.1666666666667	TCGA-BH-A0BZ-01	wtTP53
TCGA-BH-A0C0	62	LumB	0	0	42.3333333333333	TCGA-BH-A0C0-01	mTP53
TCGA-BH-A0C1	61	LumA	0	1	47.0333333333333	TCGA-BH-A0C1-01	wtTP53
TCGA-BH-A0C3	47	LumB	0	0	90.3	TCGA-BH-A0C3-01	mTP53
TCGA-BH-A0C7	48	LumB	0	0	92.2333333333333	TCGA-BH-A0C7-01	wtTP53
TCGA-BH-A0DD	58	LumB	1	0	82.8666666666667	TCGA-BH-A0DD-01	wtTP53
TCGA-BH-A0DE	62	LumA	0	0	79.0666666666667	TCGA-BH-A0DE-01	wtTP53
TCGA-BH-A0DG	30	LumA	0	0	68.0333333333333	TCGA-BH-A0DG-01	wtTP53
TCGA-BH-A0DH	63	LumA	0	0	38.5333333333333	TCGA-BH-A0DH-01	wtTP53
TCGA-BH-A0DI	63	LumA	0	0	30.4	TCGA-BH-A0DI-01	mTP53
TCGA-BH-A0DK	49	LumA	0	0	14.1	TCGA-BH-A0DK-01	wtTP53
TCGA-BH-A0DL	64	Basal	0	0	79.3666666666667	TCGA-BH-A0DL-01	mTP53
TCGA-BH-A0DO	78	LumA	0	0	54.8	TCGA-BH-A0DO-01	wtTP53
TCGA-BH-A0DP	60	LumA	0	0	15.8666666666667	TCGA-BH-A0DP-01	wtTP53
TCGA-BH-A0DQ	42	LumA	0	0	3.26666666666667	TCGA-BH-A0DQ-01	wtTP53
TCGA-BH-A0DT	41	LumA	0	0	80.1	TCGA-BH-A0DT-01	wtTP53
TCGA-BH-A0DV	54	LumA	0	0	68.8	TCGA-BH-A0DV-01	wtTP53
TCGA-BH-A0DX	62	LumA	0	0	71.8666666666667	TCGA-BH-A0DX-01	wtTP53
TCGA-BH-A0DZ	43	LumA	0	0	16.5	TCGA-BH-A0DZ-01	mTP53
TCGA-BH-A0E0	38	Basal	0	0	4.46666666666667	TCGA-BH-A0E0-01	wtTP53
TCGA-BH-A0E1	52	LumA	0	0	15.9	TCGA-BH-A0E1-01	wtTP53
TCGA-BH-A0E9	53	LumA	0	0	82.9666666666667	TCGA-BH-A0E9-01	wtTP53
TCGA-BH-A0EA	72	LumA	0	1	33.0333333333333	TCGA-BH-A0EA-01	wtTP53
TCGA-BH-A0EI	51	LumA	0	0	64.2	TCGA-BH-A0EI-01	wtTP53
TCGA-BH-A0H3	46	LumA	0	0	64.2666666666667	TCGA-BH-A0H3-01	wtTP53
TCGA-BH-A0H5	45	LumA	0	0	54	TCGA-BH-A0H5-01	wtTP53
TCGA-BH-A0H7	65	LumA	0	0	23.4	TCGA-BH-A0H7-01	wtTP53
TCGA-BH-A0H9	69	LumA	0	0	41.5666666666667	TCGA-BH-A0H9-01	wtTP53
TCGA-BH-A0HA	31	LumA	0	0	53.7	TCGA-BH-A0HA-01	wtTP53
TCGA-BH-A0HI	78	LumA	0	0	20.6666666666667	TCGA-BH-A0HI-01	wtTP53
TCGA-BH-A0HK	81	LumA	0	0	5.93333333333333	TCGA-BH-A0HK-01	wtTP53
TCGA-BH-A0HN	67	LumA	0	0	17.2	TCGA-BH-A0HN-01	wtTP53
TCGA-BH-A0HP	65	LumA	0	0	13.8	TCGA-BH-A0HP-01	wtTP53
TCGA-BH-A0RX	59	Basal	0	0	5.66666666666667	TCGA-BH-A0RX-01	mTP53
TCGA-BH-A0W3	58	LumB	0	0	24.2666666666667	TCGA-BH-A0W3-01	wtTP53
TCGA-BH-A0W4	46	LumA	0	0	25.3	TCGA-BH-A0W4-01	wtTP53
TCGA-BH-A0W5	77	LumA	0	0	42.9333333333333	TCGA-BH-A0W5-01	wtTP53
TCGA-BH-A0W7	49	LumA	0	0	45.4333333333333	TCGA-BH-A0W7-01	wtTP53
TCGA-BH-A0WA	82	Basal	0	0	23.3666666666667	TCGA-BH-A0WA-01	mTP53
TCGA-BH-A18F	50	LumA	0	0	33.3666666666667	TCGA-BH-A18F-01	wtTP53
TCGA-BH-A18G	81	Basal	0	0	4.96666666666667	TCGA-BH-A18G-01	wtTP53
TCGA-BH-A18H	63	LumA	0	0	21.7333333333333	TCGA-BH-A18H-01	mTP53
TCGA-BH-A18I	53	LumA	0	0	36.4333333333333	TCGA-BH-A18I-01	wtTP53
TCGA-BH-A18J	56	LumA	0	1	20.4	TCGA-BH-A18J-01	wtTP53
TCGA-BH-A18K	46	LumA	0	1	92.1	TCGA-BH-A18K-01	wtTP53
TCGA-BH-A18L	50	LumB	0	1	27.0333333333333	TCGA-BH-A18L-01	wtTP53
TCGA-BH-A18M	39	LumA	0	1	73.5666666666667	TCGA-BH-A18M-01	wtTP53
TCGA-BH-A18N	88	LumA	0	1	38.2666666666667	TCGA-BH-A18N-01	wtTP53
TCGA-BH-A18P	60	Her2	0	1	30.7	TCGA-BH-A18P-01	wtTP53
TCGA-BH-A18Q	56	Basal	0	1	56.4	TCGA-BH-A18Q-01	mTP53
TCGA-BH-A18R	50	Her2	0	1	38.0666666666667	TCGA-BH-A18R-01	wtTP53
TCGA-BH-A18S	79	LumA	0	1	66.9666666666667	TCGA-BH-A18S-01	wtTP53
TCGA-BH-A18T	70	Basal	0	1	7.46666666666667	TCGA-BH-A18T-01	mTP53
TCGA-BH-A18U	72	LumB	0	1	52.1	TCGA-BH-A18U-01	mTP53
TCGA-BH-A18V	48	Basal	0	1	51.8666666666667	TCGA-BH-A18V-01	mTP53
TCGA-BH-A1EO	68	LumA	0	1	93.2666666666667	TCGA-BH-A1EO-01	wtTP53
TCGA-BH-A1ET	55	LumA	0	1	84	TCGA-BH-A1ET-01	wtTP53
TCGA-BH-A1EU	83	LumA	0	1	42.8666666666667	TCGA-BH-A1EU-01	wtTP53
TCGA-BH-A1EV	45	Her2	0	1	12.1666666666667	TCGA-BH-A1EV-01	wtTP53
TCGA-BH-A1EW	38	LumA	0	1	56.4666666666667	TCGA-BH-A1EW-01	wtTP53
TCGA-BH-A1EX	67	LumA	0	1	50.2666666666667	TCGA-BH-A1EX-01	wtTP53
TCGA-BH-A1EY	79	LumA	0	1	17.9333333333333	TCGA-BH-A1EY-01	mTP53
TCGA-BH-A1F0	80	Basal	0	1	26.1666666666667	TCGA-BH-A1F0-01	mTP53
TCGA-BH-A1F2	53	LumB	0	1	31.9666666666667	TCGA-BH-A1F2-01	mTP53
TCGA-BH-A1F5	62	LumA	0	1	90.4	TCGA-BH-A1F5-01	wtTP53
TCGA-BH-A1F6	51	Basal	0	1	98.8333333333333	TCGA-BH-A1F6-01	mTP53
TCGA-BH-A1F8	90	LumB	0	1	25.4333333333333	TCGA-BH-A1F8-01	wtTP53
TCGA-BH-A1FC	78	Basal	0	1	115.733333333333	TCGA-BH-A1FC-01	mTP53
TCGA-BH-A1FE	31	LumA	0	1	75.7666666666667	TCGA-BH-A1FE-01	mTP53
TCGA-BH-A1FG	88	LumA	0	1	124.533333333333	TCGA-BH-A1FG-01	wtTP53
TCGA-BH-A1FH	47	LumA	0	1	34.4666666666667	TCGA-BH-A1FH-01	wtTP53
TCGA-BH-A1FJ	66	LumB	0	1	64.2333333333333	TCGA-BH-A1FJ-01	wtTP53
TCGA-BH-A1FL	69	LumA	0	1	55.7666666666667	TCGA-BH-A1FL-01	wtTP53
TCGA-BH-A1FM	44	LumB	0	1	46.2666666666667	TCGA-BH-A1FM-01	wtTP53
TCGA-BH-A1FN	34	LumB	0	1	73.0666666666667	TCGA-BH-A1FN-01	mTP53
TCGA-BH-A1FR	73	LumA	0	1	54.7333333333333	TCGA-BH-A1FR-01	wtTP53
TCGA-BH-A201	64	LumA	0	0	28.5333333333333	TCGA-BH-A201-01	wtTP53
TCGA-BH-A202	60	LumB	0	0	26.5	TCGA-BH-A202-01	mTP53
TCGA-BH-A203	78	Her2	0	1	39.1333333333333	TCGA-BH-A203-01	mTP53
TCGA-BH-A204	80	LumB	0	1	84.4666666666667	TCGA-BH-A204-01	wtTP53
TCGA-BH-A209	77	LumB	0	1	131.966666666667	TCGA-BH-A209-01	wtTP53
TCGA-BH-A28Q	46	LumA	0	0	37.3	TCGA-BH-A28Q-01	wtTP53
TCGA-BH-A2L8	45	LumA	0	0	20.4	TCGA-BH-A2L8-01	wtTP53
TCGA-BH-A42V	41	LumA	0	0	21.1666666666667	TCGA-BH-A42V-01	wtTP53
TCGA-BH-A5IZ	51	Basal	0	0	18.9	TCGA-BH-A5IZ-01	mTP53
TCGA-BH-A5J0	63	LumA	0	0	23.8333333333333	TCGA-BH-A5J0-01	mTP53
TCGA-BH-A6R8	46	LumA	0	0	9.76666666666667	TCGA-BH-A6R8-01	wtTP53
TCGA-BH-A8FY	87	LumA	0	1	9.83333333333333	TCGA-BH-A8FY-01	wtTP53
TCGA-BH-A8G0	54	LumA	0	0	22.0666666666667	TCGA-BH-A8G0-01	wtTP53
TCGA-BH-AB28	53	LumA	0	0	9.56666666666667	TCGA-BH-AB28-01	wtTP53
TCGA-C8-A12L	67	Her2	0	0	12.1	TCGA-C8-A12L-01	mTP53
TCGA-C8-A12M	70	LumB	0	0	11.9333333333333	TCGA-C8-A12M-01	wtTP53
TCGA-C8-A12N	58	LumA	0	0	11.9333333333333	TCGA-C8-A12N-01	wtTP53
TCGA-C8-A12O	50	LumA	0	0	12.8333333333333	TCGA-C8-A12O-01	mTP53
TCGA-C8-A12P	55	Her2	0	0	11.9333333333333	TCGA-C8-A12P-01	mTP53
TCGA-C8-A12Q	78	Her2	0	1	12.8333333333333	TCGA-C8-A12Q-01	mTP53
TCGA-C8-A12U	46	LumB	0	0	12.8333333333333	TCGA-C8-A12U-01	wtTP53
TCGA-C8-A12V	55	Basal	0	0	12.8333333333333	TCGA-C8-A12V-01	mTP53
TCGA-C8-A12W	49	LumB	0	0	12.8333333333333	TCGA-C8-A12W-01	mTP53
TCGA-C8-A12X	62	LumA	0	0	12.8333333333333	TCGA-C8-A12X-01	wtTP53
TCGA-C8-A12Y	44	LumA	0	0	49.2	TCGA-C8-A12Y-01	wtTP53
TCGA-C8-A12Z	45	Her2	0	0	12.7333333333333	TCGA-C8-A12Z-01	mTP53
TCGA-C8-A130	52	LumB	0	0	12.3333333333333	TCGA-C8-A130-01	mTP53
TCGA-C8-A131	82	Basal	0	0	13.7	TCGA-C8-A131-01	mTP53
TCGA-C8-A132	56	LumA	0	0	12.7666666666667	TCGA-C8-A132-01	wtTP53
TCGA-C8-A134	52	Basal	0	0	12.7666666666667	TCGA-C8-A134-01	mTP53
TCGA-C8-A135	64	Her2	0	0	13.1	TCGA-C8-A135-01	mTP53
TCGA-C8-A137	34	Her2	0	0	12.6333333333333	TCGA-C8-A137-01	wtTP53
TCGA-C8-A138	54	Her2	0	0	12.6666666666667	TCGA-C8-A138-01	mTP53
TCGA-C8-A1HE	59	LumA	0	0	12.5	TCGA-C8-A1HE-01	wtTP53
TCGA-C8-A1HG	50	LumB	0	0	11.5	TCGA-C8-A1HG-01	mTP53
TCGA-C8-A1HI	40	LumA	0	0	11.4333333333333	TCGA-C8-A1HI-01	wtTP53
TCGA-C8-A1HJ	53	Basal	0	0	0.166666666666667	TCGA-C8-A1HJ-01	mTP53
TCGA-C8-A1HK	53	Her2	0	0	12.2	TCGA-C8-A1HK-01	mTP53
TCGA-C8-A1HL	38	LumB	0	0	10.5666666666667	TCGA-C8-A1HL-01	wtTP53
TCGA-C8-A1HM	74	LumB	0	0	12.5	TCGA-C8-A1HM-01	mTP53
TCGA-C8-A1HN	56	LumB	0	0	13.1333333333333	TCGA-C8-A1HN-01	wtTP53
TCGA-C8-A1HO	34	LumA	0	0	12.5	TCGA-C8-A1HO-01	wtTP53
TCGA-C8-A26V	47	LumB	0	0	20.5333333333333	TCGA-C8-A26V-01	mTP53
TCGA-C8-A26W	58	LumB	0	0	12.7	TCGA-C8-A26W-01	mTP53
TCGA-C8-A26X	58	Her2	0	0	12.5333333333333	TCGA-C8-A26X-01	wtTP53
TCGA-C8-A26Y	90	Her2	0	0	13.1333333333333	TCGA-C8-A26Y-01	mTP53
TCGA-C8-A26Z	59	LumA	0	0	15.6666666666667	TCGA-C8-A26Z-01	wtTP53
TCGA-C8-A273	29	LumA	0	0	17.1	TCGA-C8-A273-01	wtTP53
TCGA-C8-A274	63	LumB	0	0	16.9333333333333	TCGA-C8-A274-01	wtTP53
TCGA-C8-A275	56	Her2	0	0	0.0333333333333333	TCGA-C8-A275-01	mTP53
TCGA-C8-A278	61	Her2	0	0	9.9	TCGA-C8-A278-01	mTP53
TCGA-C8-A27A	48	LumB	0	0	24.9	TCGA-C8-A27A-01	mTP53
TCGA-C8-A27B	48	Basal	0	0	14.6333333333333	TCGA-C8-A27B-01	mTP53
TCGA-C8-A3M7	60	LumA	0	1	34.4666666666667	TCGA-C8-A3M7-01	wtTP53
TCGA-C8-A3M8	68	LumB	0	0	13.1333333333333	TCGA-C8-A3M8-01	wtTP53
TCGA-C8-A8HP	59	Her2	0	0	13.2	TCGA-C8-A8HP-01	mTP53
TCGA-C8-A8HQ	53	LumB	0	0	12.6666666666667	TCGA-C8-A8HQ-01	wtTP53
TCGA-D8-A13Y	52	LumB	0	0	57.6	TCGA-D8-A13Y-01	mTP53
TCGA-D8-A13Z	51	Her2	0	0	21.1666666666667	TCGA-D8-A13Z-01	mTP53
TCGA-D8-A140	62	LumA	0	0	13.4333333333333	TCGA-D8-A140-01	wtTP53
TCGA-D8-A141	40	LumA	0	0	20.8666666666667	TCGA-D8-A141-01	wtTP53
TCGA-D8-A142	74	Basal	0	0	14.1666666666667	TCGA-D8-A142-01	mTP53
TCGA-D8-A143	51	Basal	0	0	14.3666666666667	TCGA-D8-A143-01	mTP53
TCGA-D8-A145	80	LumA	0	0	13.6666666666667	TCGA-D8-A145-01	wtTP53
TCGA-D8-A146	57	LumA	0	0	21.4333333333333	TCGA-D8-A146-01	wtTP53
TCGA-D8-A147	45	Basal	0	0	19.4666666666667	TCGA-D8-A147-01	mTP53
TCGA-D8-A1J8	77	LumB	0	0	14.3666666666667	TCGA-D8-A1J8-01	wtTP53
TCGA-D8-A1J9	48	LumB	0	0	17.7333333333333	TCGA-D8-A1J9-01	mTP53
TCGA-D8-A1JB	54	LumA	0	0	56.2666666666667	TCGA-D8-A1JB-01	wtTP53
TCGA-D8-A1JC	59	LumB	0	0	16	TCGA-D8-A1JC-01	wtTP53
TCGA-D8-A1JD	41	LumB	0	0	18.4	TCGA-D8-A1JD-01	wtTP53
TCGA-D8-A1JE	62	LumB	0	0	19.1666666666667	TCGA-D8-A1JE-01	wtTP53
TCGA-D8-A1JF	79	Her2	0	0	12.2	TCGA-D8-A1JF-01	mTP53
TCGA-D8-A1JG	62	Her2	0	0	53.7333333333333	TCGA-D8-A1JG-01	mTP53
TCGA-D8-A1JH	56	LumA	0	0	14.2	TCGA-D8-A1JH-01	wtTP53
TCGA-D8-A1JI	54	LumB	0	0	19.2333333333333	TCGA-D8-A1JI-01	wtTP53
TCGA-D8-A1JJ	54	LumB	0	0	20.3666666666667	TCGA-D8-A1JJ-01	mTP53
TCGA-D8-A1JK	90	Basal	0	0	20.4	TCGA-D8-A1JK-01	mTP53
TCGA-D8-A1JL	72	Basal	0	0	20.3666666666667	TCGA-D8-A1JL-01	mTP53
TCGA-D8-A1JM	59	Basal	0	0	19.6666666666667	TCGA-D8-A1JM-01	mTP53
TCGA-D8-A1JN	80	LumA	0	0	20.6666666666667	TCGA-D8-A1JN-01	wtTP53
TCGA-D8-A1JP	73	LumA	0	0	21.3	TCGA-D8-A1JP-01	wtTP53
TCGA-D8-A1JS	77	LumA	0	0	12.3666666666667	TCGA-D8-A1JS-01	wtTP53
TCGA-D8-A1JT	70	LumB	0	0	13.5	TCGA-D8-A1JT-01	wtTP53
TCGA-D8-A1JU	51	LumA	0	0	14.9	TCGA-D8-A1JU-01	wtTP53
TCGA-D8-A1X5	81	LumB	0	0	18.8333333333333	TCGA-D8-A1X5-01	mTP53
TCGA-D8-A1X6	80	LumB	0	0	18.0333333333333	TCGA-D8-A1X6-01	wtTP53
TCGA-D8-A1X7	40	LumB	0	0	16.9666666666667	TCGA-D8-A1X7-01	wtTP53
TCGA-D8-A1X9	66	LumA	0	0	24.2333333333333	TCGA-D8-A1X9-01	wtTP53
TCGA-D8-A1XA	64	LumA	0	0	27.9666666666667	TCGA-D8-A1XA-01	mTP53
TCGA-D8-A1XB	62	LumA	0	0	18.4	TCGA-D8-A1XB-01	wtTP53
TCGA-D8-A1XC	85	LumA	0	1	12.5666666666667	TCGA-D8-A1XC-01	wtTP53
TCGA-D8-A1XF	45	LumB	0	0	15.4333333333333	TCGA-D8-A1XF-01	wtTP53
TCGA-D8-A1XG	86	LumA	0	0	14.9333333333333	TCGA-D8-A1XG-01	wtTP53
TCGA-D8-A1XK	55	Basal	0	0	14.7	TCGA-D8-A1XK-01	mTP53
TCGA-D8-A1XL	34	LumB	0	0	20.2	TCGA-D8-A1XL-01	mTP53
TCGA-D8-A1XM	57	LumA	0	0	17.9333333333333	TCGA-D8-A1XM-01	wtTP53
TCGA-D8-A1XO	56	LumA	0	0	56.0666666666667	TCGA-D8-A1XO-01	wtTP53
TCGA-D8-A1XQ	69	Basal	0	0	16.6333333333333	TCGA-D8-A1XQ-01	mTP53
TCGA-D8-A1XR	56	LumB	0	0	16.0666666666667	TCGA-D8-A1XR-01	wtTP53
TCGA-D8-A1XS	48	LumB	1	0	16.5333333333333	TCGA-D8-A1XS-01	wtTP53
TCGA-D8-A1XT	61	Her2	0	0	16.8666666666667	TCGA-D8-A1XT-01	mTP53
TCGA-D8-A1XU	56	LumA	0	0	13.1666666666667	TCGA-D8-A1XU-01	wtTP53
TCGA-D8-A1XV	84	LumA	0	0	15.3666666666667	TCGA-D8-A1XV-01	wtTP53
TCGA-D8-A1XY	74	LumA	0	0	16.7666666666667	TCGA-D8-A1XY-01	wtTP53
TCGA-D8-A1XZ	81	LumB	0	0	15.5333333333333	TCGA-D8-A1XZ-01	mTP53
TCGA-D8-A1Y0	65	LumA	0	0	15.7333333333333	TCGA-D8-A1Y0-01	wtTP53
TCGA-D8-A1Y1	80	LumB	0	1	10.0666666666667	TCGA-D8-A1Y1-01	wtTP53
TCGA-D8-A1Y2	71	LumB	0	0	14.4333333333333	TCGA-D8-A1Y2-01	wtTP53
TCGA-D8-A1Y3	61	LumB	0	0	14.3333333333333	TCGA-D8-A1Y3-01	mTP53
TCGA-D8-A27E	66	LumA	0	0	17.6666666666667	TCGA-D8-A27E-01	wtTP53
TCGA-D8-A27F	40	Basal	0	0	16.2666666666667	TCGA-D8-A27F-01	mTP53
TCGA-D8-A27G	75	LumA	0	0	13.6333333333333	TCGA-D8-A27G-01	wtTP53
TCGA-D8-A27H	72	Basal	0	0	13.2333333333333	TCGA-D8-A27H-01	wtTP53
TCGA-D8-A27I	58	LumA	0	0	14.6333333333333	TCGA-D8-A27I-01	wtTP53
TCGA-D8-A27K	47	LumA	0	0	48.7	TCGA-D8-A27K-01	wtTP53
TCGA-D8-A27L	49	LumA	0	0	16.6333333333333	TCGA-D8-A27L-01	wtTP53
TCGA-D8-A27M	59	Basal	0	0	13.6666666666667	TCGA-D8-A27M-01	mTP53
TCGA-D8-A27N	36	LumB	0	0	17.3	TCGA-D8-A27N-01	mTP53
TCGA-D8-A27P	64	LumA	0	0	1.63333333333333	TCGA-D8-A27P-01	wtTP53
TCGA-D8-A27R	41	LumB	0	0	0.966666666666667	TCGA-D8-A27R-01	wtTP53
TCGA-D8-A27T	53	LumA	0	0	13.2666666666667	TCGA-D8-A27T-01	wtTP53
TCGA-D8-A27V	62	LumA	0	0	12.7	TCGA-D8-A27V-01	wtTP53
TCGA-D8-A27W	55	LumB	0	0	12.4333333333333	TCGA-D8-A27W-01	wtTP53
TCGA-D8-A3Z6	56	LumA	0	0	18.7666666666667	TCGA-D8-A3Z6-01	wtTP53
TCGA-D8-A4Z1	68	LumA	0	0	21.9666666666667	TCGA-D8-A4Z1-01	wtTP53
TCGA-D8-A73U	88	LumA	0	0	16.4	TCGA-D8-A73U-01	wtTP53
TCGA-D8-A73W	79	LumA	0	1	12.8333333333333	TCGA-D8-A73W-01	wtTP53
TCGA-D8-A73X	53	LumA	0	0	25.5666666666667	TCGA-D8-A73X-01	wtTP53
TCGA-E2-A105	79	LumA	0	0	43.6	TCGA-E2-A105-01	wtTP53
TCGA-E2-A107	54	LumA	0	0	34.9	TCGA-E2-A107-01	wtTP53
TCGA-E2-A109	64	LumB	0	0	47.2333333333333	TCGA-E2-A109-01	mTP53
TCGA-E2-A10A	41	LumA	0	0	40.9666666666667	TCGA-E2-A10A-01	wtTP53
TCGA-E2-A10B	67	LumA	0	0	38.0333333333333	TCGA-E2-A10B-01	wtTP53
TCGA-E2-A10C	54	LumB	0	0	40.6666666666667	TCGA-E2-A10C-01	wtTP53
TCGA-E2-A10F	47	LumA	0	0	29.2666666666667	TCGA-E2-A10F-01	wtTP53
TCGA-E2-A14N	37	Basal	0	0	47.8	TCGA-E2-A14N-01	mTP53
TCGA-E2-A14O	76	LumB	0	0	45.3	TCGA-E2-A14O-01	wtTP53
TCGA-E2-A14P	79	Her2	0	0	41.5333333333333	TCGA-E2-A14P-01	mTP53
TCGA-E2-A14Q	50	LumA	0	0	38.7666666666667	TCGA-E2-A14Q-01	wtTP53
TCGA-E2-A14R	62	Basal	0	0	39.1333333333333	TCGA-E2-A14R-01	mTP53
TCGA-E2-A14T	52	LumA	0	0	77.0333333333333	TCGA-E2-A14T-01	wtTP53
TCGA-E2-A14V	53	Her2	0	0	34.7333333333333	TCGA-E2-A14V-01	wtTP53
TCGA-E2-A14W	78	LumB	1	0	32.4666666666667	TCGA-E2-A14W-01	wtTP53
TCGA-E2-A14X	55	Basal	0	0	32.4	TCGA-E2-A14X-01	mTP53
TCGA-E2-A14Y	35	Basal	0	0	70.3	TCGA-E2-A14Y-01	mTP53
TCGA-E2-A14Z	64	LumA	0	1	18.7666666666667	TCGA-E2-A14Z-01	mTP53
TCGA-E2-A150	48	Basal	0	0	64.5	TCGA-E2-A150-01	mTP53
TCGA-E2-A152	56	Her2	0	0	70.9333333333333	TCGA-E2-A152-01	mTP53
TCGA-E2-A153	51	LumA	0	0	23.5666666666667	TCGA-E2-A153-01	wtTP53
TCGA-E2-A154	68	LumA	0	0	19.7	TCGA-E2-A154-01	wtTP53
TCGA-E2-A155	58	LumB	0	0	21.3333333333333	TCGA-E2-A155-01	mTP53
TCGA-E2-A156	61	LumA	0	0	24.2	TCGA-E2-A156-01	wtTP53
TCGA-E2-A158	43	Basal	0	0	15	TCGA-E2-A158-01	mTP53
TCGA-E2-A159	50	Basal	0	0	25.4	TCGA-E2-A159-01	mTP53
TCGA-E2-A15A	45	LumB	0	0	23.6666666666667	TCGA-E2-A15A-01	wtTP53
TCGA-E2-A15C	61	LumA	0	0	23.1333333333333	TCGA-E2-A15C-01	wtTP53
TCGA-E2-A15D	47	LumA	0	0	17.5333333333333	TCGA-E2-A15D-01	wtTP53
TCGA-E2-A15E	40	LumA	0	0	21	TCGA-E2-A15E-01	mTP53
TCGA-E2-A15F	64	LumA	0	0	21.9333333333333	TCGA-E2-A15F-01	wtTP53
TCGA-E2-A15G	76	LumA	0	0	18.4666666666667	TCGA-E2-A15G-01	wtTP53
TCGA-E2-A15H	38	LumA	0	0	13.1	TCGA-E2-A15H-01	wtTP53
TCGA-E2-A15I	44	LumA	0	0	56.4	TCGA-E2-A15I-01	wtTP53
TCGA-E2-A15J	51	LumA	0	0	54.6666666666667	TCGA-E2-A15J-01	wtTP53
TCGA-E2-A15K	58	LumB	0	0	9.16666666666667	TCGA-E2-A15K-01	wtTP53
TCGA-E2-A15L	65	LumA	0	0	20.8666666666667	TCGA-E2-A15L-01	wtTP53
TCGA-E2-A15M	66	LumA	0	1	11.2	TCGA-E2-A15M-01	mTP53
TCGA-E2-A15O	89	LumA	0	0	51.5	TCGA-E2-A15O-01	wtTP53
TCGA-E2-A15P	61	LumA	0	0	19.8333333333333	TCGA-E2-A15P-01	wtTP53
TCGA-E2-A15R	64	LumA	0	0	57.7333333333333	TCGA-E2-A15R-01	wtTP53
TCGA-E2-A15S	34	LumB	0	0	14.2666666666667	TCGA-E2-A15S-01	wtTP53
TCGA-E2-A15T	65	LumB	0	0	52.1	TCGA-E2-A15T-01	wtTP53
TCGA-E2-A1AZ	63	Basal	0	0	77.6333333333333	TCGA-E2-A1AZ-01	mTP53
TCGA-E2-A1B0	50	Her2	0	0	54.3666666666667	TCGA-E2-A1B0-01	mTP53
TCGA-E2-A1B1	45	LumA	0	0	88.4333333333333	TCGA-E2-A1B1-01	mTP53
TCGA-E2-A1B4	74	LumA	0	1	33.4666666666667	TCGA-E2-A1B4-01	wtTP53
TCGA-E2-A1B5	46	LumA	0	0	32.8	TCGA-E2-A1B5-01	wtTP53
TCGA-E2-A1B6	44	Basal	0	0	28.9	TCGA-E2-A1B6-01	mTP53
TCGA-E2-A1BC	63	LumA	0	0	16.7	TCGA-E2-A1BC-01	wtTP53
TCGA-E2-A1BD	53	LumA	0	0	37.7666666666667	TCGA-E2-A1BD-01	wtTP53
TCGA-E2-A1IE	61	LumA	0	0	78.7333333333333	TCGA-E2-A1IE-01	wtTP53
TCGA-E2-A1IF	74	LumA	0	0	37.9333333333333	TCGA-E2-A1IF-01	wtTP53
TCGA-E2-A1IG	45	LumA	0	0	71.3333333333333	TCGA-E2-A1IG-01	wtTP53
TCGA-E2-A1IH	80	LumA	0	0	34.2	TCGA-E2-A1IH-01	wtTP53
TCGA-E2-A1II	51	Basal	0	0	34.1666666666667	TCGA-E2-A1II-01	mTP53
TCGA-E2-A1IJ	57	LumA	0	0	28.8333333333333	TCGA-E2-A1IJ-01	wtTP53
TCGA-E2-A1IK	71	LumA	0	0	60	TCGA-E2-A1IK-01	wtTP53
TCGA-E2-A1IL	78	LumA	0	0	3.93333333333333	TCGA-E2-A1IL-01	wtTP53
TCGA-E2-A1IN	60	LumA	0	0	22.5	TCGA-E2-A1IN-01	mTP53
TCGA-E2-A1IO	37	LumA	0	0	61.8333333333333	TCGA-E2-A1IO-01	wtTP53
TCGA-E2-A1IU	60	LumA	0	0	11.2333333333333	TCGA-E2-A1IU-01	wtTP53
TCGA-E2-A1L6	44	LumA	0	0	54.9333333333333	TCGA-E2-A1L6-01	wtTP53
TCGA-E2-A1L7	40	LumB	0	0	61.2	TCGA-E2-A1L7-01	mTP53
TCGA-E2-A1L8	52	LumA	0	0	74.6666666666667	TCGA-E2-A1L8-01	wtTP53
TCGA-E2-A1L9	40	LumA	0	0	19.9333333333333	TCGA-E2-A1L9-01	wtTP53
TCGA-E2-A1LA	59	LumA	0	0	24.9333333333333	TCGA-E2-A1LA-01	wtTP53
TCGA-E2-A1LB	41	Her2	0	0	76.8666666666667	TCGA-E2-A1LB-01	wtTP53
TCGA-E2-A1LG	50	Basal	0	0	50.7666666666667	TCGA-E2-A1LG-01	mTP53
TCGA-E2-A1LH	59	Basal	0	0	108.233333333333	TCGA-E2-A1LH-01	mTP53
TCGA-E2-A1LI	57	Basal	0	0	104.033333333333	TCGA-E2-A1LI-01	wtTP53
TCGA-E2-A1LK	84	Basal	0	1	8.86666666666667	TCGA-E2-A1LK-01	mTP53
TCGA-E2-A1LL	73	Basal	0	0	43.6333333333333	TCGA-E2-A1LL-01	wtTP53
TCGA-E2-A2P6	77	LumA	0	0	35.0333333333333	TCGA-E2-A2P6-01	wtTP53
TCGA-E2-A56Z	69	LumB	0	0	8.4	TCGA-E2-A56Z-01	wtTP53
TCGA-E2-A570	47	LumA	0	0	31.0333333333333	TCGA-E2-A570-01	wtTP53
TCGA-E2-A572	72	LumA	0	0	40.2666666666667	TCGA-E2-A572-01	wtTP53
TCGA-E2-A573	48	Basal	0	0	35.4	TCGA-E2-A573-01	mTP53
TCGA-E2-A574	44	Basal	0	0	39.3	TCGA-E2-A574-01	mTP53
TCGA-E2-A576	69	LumA	0	0	34.7666666666667	TCGA-E2-A576-01	wtTP53
TCGA-E2-A9RU	90	LumB	0	0	17.9333333333333	TCGA-E2-A9RU-01	mTP53
TCGA-E9-A1N3	70	LumA	0	0	35.3	TCGA-E9-A1N3-01	wtTP53
TCGA-E9-A1N4	41	LumA	0	0	33.3333333333333	TCGA-E9-A1N4-01	wtTP53
TCGA-E9-A1N5	45	LumA	0	0	37.3333333333333	TCGA-E9-A1N5-01	mTP53
TCGA-E9-A1N8	48	Basal	0	0	34.6333333333333	TCGA-E9-A1N8-01	mTP53
TCGA-E9-A1N9	58	Basal	0	0	36.7	TCGA-E9-A1N9-01	mTP53
TCGA-E9-A1NA	58	LumB	0	0	37.0666666666667	TCGA-E9-A1NA-01	wtTP53
TCGA-E9-A1NE	28	LumA	0	0	36.2666666666667	TCGA-E9-A1NE-01	wtTP53
TCGA-E9-A1NF	60	LumB	0	0	20.3333333333333	TCGA-E9-A1NF-01	mTP53
TCGA-E9-A1NG	62	LumA	0	1	26.2	TCGA-E9-A1NG-01	wtTP53
TCGA-E9-A1NH	71	LumA	0	0	19.2	TCGA-E9-A1NH-01	wtTP53
TCGA-E9-A1QZ	61	LumA	0	0	25.1666666666667	TCGA-E9-A1QZ-01	wtTP53
TCGA-E9-A1R0	58	LumA	0	0	28.6666666666667	TCGA-E9-A1R0-01	wtTP53
TCGA-E9-A1R2	51	LumA	0	0	0.633333333333333	TCGA-E9-A1R2-01	wtTP53
TCGA-E9-A1R3	70	LumA	0	0	2.13333333333333	TCGA-E9-A1R3-01	wtTP53
TCGA-E9-A1R4	66	LumB	0	0	0.966666666666667	TCGA-E9-A1R4-01	wtTP53
TCGA-E9-A1R5	63	LumA	0	0	1.4	TCGA-E9-A1R5-01	wtTP53
TCGA-E9-A1R6	63	LumA	0	0	11.3	TCGA-E9-A1R6-01	wtTP53
TCGA-E9-A1R7	64	LumB	0	0	48.9	TCGA-E9-A1R7-01	wtTP53
TCGA-E9-A1RA	48	LumA	0	0	45.6333333333333	TCGA-E9-A1RA-01	wtTP53
TCGA-E9-A1RB	40	LumB	0	1	32.5333333333333	TCGA-E9-A1RB-01	mTP53
TCGA-E9-A1RC	56	LumA	0	0	40.8	TCGA-E9-A1RC-01	wtTP53
TCGA-E9-A1RD	67	LumA	0	0	0.666666666666667	TCGA-E9-A1RD-01	wtTP53
TCGA-E9-A1RE	74	LumB	0	0	47.3	TCGA-E9-A1RE-01	wtTP53
TCGA-E9-A1RF	68	LumA	0	0	1.26666666666667	TCGA-E9-A1RF-01	wtTP53
TCGA-E9-A1RG	62	LumB	0	0	21.5666666666667	TCGA-E9-A1RG-01	wtTP53
TCGA-E9-A1RH	63	Her2	0	0	47.2333333333333	TCGA-E9-A1RH-01	mTP53
TCGA-E9-A1RI	43	LumA	0	0	48.3	TCGA-E9-A1RI-01	wtTP53
TCGA-E9-A226	45	LumB	0	1	34.9333333333333	TCGA-E9-A226-01	mTP53
TCGA-E9-A227	42	LumA	0	0	0.8	TCGA-E9-A227-01	wtTP53
TCGA-E9-A228	58	LumB	0	0	42.8333333333333	TCGA-E9-A228-01	wtTP53
TCGA-E9-A229	37	LumA	0	0	38.2666666666667	TCGA-E9-A229-01	wtTP53
TCGA-E9-A22A	74	LumB	0	0	23.7666666666667	TCGA-E9-A22A-01	wtTP53
TCGA-E9-A22B	71	LumA	0	0	38.9	TCGA-E9-A22B-01	wtTP53
TCGA-E9-A22D	38	LumB	0	0	13.4	TCGA-E9-A22D-01	wtTP53
TCGA-E9-A22E	56	LumB	0	0	42.3	TCGA-E9-A22E-01	mTP53
TCGA-E9-A22G	47	Basal	0	0	41.3	TCGA-E9-A22G-01	mTP53
TCGA-E9-A22H	42	LumB	0	0	11	TCGA-E9-A22H-01	wtTP53
TCGA-E9-A243	52	Basal	0	0	1.43333333333333	TCGA-E9-A243-01	mTP53
TCGA-E9-A244	54	Basal	0	0	0.7	TCGA-E9-A244-01	mTP53
TCGA-E9-A245	47	LumA	0	0	0.866666666666667	TCGA-E9-A245-01	wtTP53
TCGA-E9-A247	59	LumA	0	0	39.5333333333333	TCGA-E9-A247-01	wtTP53
TCGA-E9-A248	51	Her2	0	0	1.96666666666667	TCGA-E9-A248-01	mTP53
TCGA-E9-A249	45	LumB	0	0	7.23333333333333	TCGA-E9-A249-01	wtTP53
TCGA-E9-A24A	69	LumA	0	0	24.9	TCGA-E9-A24A-01	wtTP53
TCGA-E9-A295	71	LumA	0	0	12.5	TCGA-E9-A295-01	wtTP53
TCGA-E9-A2JS	72	LumB	0	0	18	TCGA-E9-A2JS-01	wtTP53
TCGA-E9-A2JT	63	LumA	0	0	9.6	TCGA-E9-A2JT-01	wtTP53
TCGA-E9-A3HO	49	LumB	0	0	38.6	TCGA-E9-A3HO-01	wtTP53
TCGA-E9-A3QA	33	Basal	0	0	30.6	TCGA-E9-A3QA-01	wtTP53
TCGA-E9-A3X8	48	LumA	0	0	30.8666666666667	TCGA-E9-A3X8-01	wtTP53
TCGA-E9-A54Y	63	LumB	0	0	24.1666666666667	TCGA-E9-A54Y-01	wtTP53
TCGA-E9-A5FK	60	LumA	0	0	27.0666666666667	TCGA-E9-A5FK-01	wtTP53
TCGA-E9-A5FL	65	Basal	0	0	0.8	TCGA-E9-A5FL-01	mTP53
TCGA-E9-A5UO	41	LumB	0	0	26.1666666666667	TCGA-E9-A5UO-01	wtTP53
TCGA-E9-A6HE	45	LumA	0	0	28.2333333333333	TCGA-E9-A6HE-01	mTP53
TCGA-EW-A1IW	80	LumA	0	0	12.3666666666667	TCGA-EW-A1IW-01	wtTP53
TCGA-EW-A1IX	48	LumA	0	0	40.2666666666667	TCGA-EW-A1IX-01	wtTP53
TCGA-EW-A1IY	38	LumB	0	0	8.6	TCGA-EW-A1IY-01	wtTP53
TCGA-EW-A1IZ	53	LumA	0	0	18.4666666666667	TCGA-EW-A1IZ-01	wtTP53
TCGA-EW-A1J1	38	LumA	0	0	19.1666666666667	TCGA-EW-A1J1-01	wtTP53
TCGA-EW-A1J3	61	LumA	0	0	16.8	TCGA-EW-A1J3-01	wtTP53
TCGA-EW-A1J5	59	LumA	0	0	15.9	TCGA-EW-A1J5-01	wtTP53
TCGA-EW-A1J6	70	LumB	0	0	29.1666666666667	TCGA-EW-A1J6-01	wtTP53
TCGA-EW-A1OV	56	Her2	0	0	26.3	TCGA-EW-A1OV-01	wtTP53
TCGA-EW-A1OX	43	LumB	0	0	30.3666666666667	TCGA-EW-A1OX-01	wtTP53
TCGA-EW-A1OZ	56	LumB	0	0	40.9666666666667	TCGA-EW-A1OZ-01	mTP53
TCGA-EW-A1P0	55	LumB	0	0	41.7	TCGA-EW-A1P0-01	wtTP53
TCGA-EW-A1P3	48	LumA	0	0	53.7	TCGA-EW-A1P3-01	wtTP53
TCGA-EW-A1P4	43	Basal	0	0	30.2333333333333	TCGA-EW-A1P4-01	mTP53
TCGA-EW-A1P5	77	LumA	0	0	23.4333333333333	TCGA-EW-A1P5-01	wtTP53
TCGA-EW-A1P6	64	LumA	0	0	18.7333333333333	TCGA-EW-A1P6-01	wtTP53
TCGA-EW-A1P8	58	Basal	0	1	7.96666666666667	TCGA-EW-A1P8-01	mTP53
TCGA-EW-A1PA	59	LumA	0	0	19.1666666666667	TCGA-EW-A1PA-01	mTP53
TCGA-EW-A1PB	70	Basal	0	0	20.2666666666667	TCGA-EW-A1PB-01	mTP53
TCGA-EW-A1PD	61	LumA	1	0	14.1333333333333	TCGA-EW-A1PD-01	wtTP53
TCGA-EW-A1PE	56	LumA	0	0	10.6666666666667	TCGA-EW-A1PE-01	wtTP53
TCGA-EW-A1PH	52	Basal	0	0	20.2333333333333	TCGA-EW-A1PH-01	mTP53
TCGA-EW-A2FR	59	Her2	0	0	55.7666666666667	TCGA-EW-A2FR-01	mTP53
TCGA-EW-A2FS	41	LumA	0	0	53.4666666666667	TCGA-EW-A2FS-01	wtTP53
TCGA-EW-A2FV	39	LumA	0	0	26.2666666666667	TCGA-EW-A2FV-01	wtTP53
TCGA-EW-A2FW	52	LumB	0	0	22.4	TCGA-EW-A2FW-01	wtTP53
TCGA-EW-A423	75	LumA	0	0	17.7666666666667	TCGA-EW-A423-01	wtTP53
TCGA-EW-A6S9	34	LumA	0	0	15.4333333333333	TCGA-EW-A6S9-01	mTP53
TCGA-EW-A6SA	59	LumB	1	0	17	TCGA-EW-A6SA-01	wtTP53
TCGA-EW-A6SB	62	Basal	0	0	25.3333333333333	TCGA-EW-A6SB-01	mTP53
TCGA-EW-A6SC	60	LumA	0	0	31.7333333333333	TCGA-EW-A6SC-01	wtTP53
TCGA-EW-A6SD	32	Her2	0	0	33.6666666666667	TCGA-EW-A6SD-01	mTP53
TCGA-GI-A2C8	63	LumA	0	0	7.5	TCGA-GI-A2C8-01	wtTP53
TCGA-GM-A2D9	69	LumA	0	1	60.4	TCGA-GM-A2D9-01	wtTP53
TCGA-GM-A2DA	46	LumA	0	1	219.766666666667	TCGA-GM-A2DA-01	wtTP53
TCGA-GM-A2DB	62	Her2	0	0	80.2	TCGA-GM-A2DB-01	mTP53
TCGA-GM-A2DC	57	LumA	0	0	84.5	TCGA-GM-A2DC-01	wtTP53
TCGA-GM-A2DF	53	Basal	0	0	71.8333333333333	TCGA-GM-A2DF-01	mTP53
TCGA-GM-A2DH	58	Her2	0	0	73.1	TCGA-GM-A2DH-01	mTP53
TCGA-GM-A2DI	52	LumA	0	0	86.3333333333333	TCGA-GM-A2DI-01	wtTP53
TCGA-GM-A2DK	58	LumA	0	0	88.1666666666667	TCGA-GM-A2DK-01	wtTP53
TCGA-GM-A2DL	50	LumA	0	0	117.3	TCGA-GM-A2DL-01	mTP53
TCGA-GM-A2DM	57	LumA	0	0	107.533333333333	TCGA-GM-A2DM-01	wtTP53
TCGA-GM-A2DN	58	LumA	0	0	103.033333333333	TCGA-GM-A2DN-01	wtTP53
TCGA-GM-A2DO	54	LumB	0	0	86.5333333333333	TCGA-GM-A2DO-01	wtTP53
TCGA-GM-A3NW	63	LumA	0	0	112.033333333333	TCGA-GM-A3NW-01	wtTP53
TCGA-GM-A3XL	49	Basal	0	0	70.2666666666667	TCGA-GM-A3XL-01	mTP53
TCGA-GM-A4E0	67	LumA	0	0	73.0333333333333	TCGA-GM-A4E0-01	wtTP53
TCGA-GM-A5PV	63	LumA	0	0	13.7333333333333	TCGA-GM-A5PV-01	wtTP53
TCGA-GM-A5PX	65	LumA	0	0	18.3666666666667	TCGA-GM-A5PX-01	wtTP53
TCGA-HN-A2NL	56	Basal	0	0	2.63333333333333	TCGA-HN-A2NL-01	wtTP53
TCGA-HN-A2OB	45	LumA	0	1	63.3333333333333	TCGA-HN-A2OB-01	wtTP53
TCGA-JL-A3YX	46	LumA	0	0	11.7333333333333	TCGA-JL-A3YX-01	wtTP53
TCGA-LD-A66U	44	LumA	0	0	21.5333333333333	TCGA-LD-A66U-01	wtTP53
TCGA-LD-A74U	79	LumA	0	0	13.4	TCGA-LD-A74U-01	mTP53
TCGA-LD-A7W5	52	LumA	0	0	7.2	TCGA-LD-A7W5-01	mTP53
TCGA-LD-A7W6	54	LumA	0	0	13.4666666666667	TCGA-LD-A7W6-01	wtTP53
TCGA-LL-A440	61	LumA	0	0	25.3	TCGA-LL-A440-01	wtTP53
TCGA-LL-A50Y	84	LumA	0	0	25.4	TCGA-LL-A50Y-01	wtTP53
TCGA-LL-A5YL	64	LumA	0	0	17.3	TCGA-LL-A5YL-01	wtTP53
TCGA-LL-A5YM	88	LumB	0	0	15.5333333333333	TCGA-LL-A5YM-01	wtTP53
TCGA-LL-A5YN	46	LumA	0	0	14.9	TCGA-LL-A5YN-01	wtTP53
TCGA-LL-A5YO	50	Her2	0	0	14.6666666666667	TCGA-LL-A5YO-01	mTP53
TCGA-LL-A5YP	49	Basal	0	0	15	TCGA-LL-A5YP-01	mTP53
TCGA-LL-A6FP	90	LumA	0	0	22.5666666666667	TCGA-LL-A6FP-01	wtTP53
TCGA-LL-A6FQ	77	LumA	0	0	2.66666666666667	TCGA-LL-A6FQ-01	wtTP53
TCGA-LL-A6FR	50	Basal	0	0	16.3	TCGA-LL-A6FR-01	mTP53
TCGA-LL-A73Y	67	Basal	0	0	15.9	TCGA-LL-A73Y-01	mTP53
TCGA-LL-A740	61	LumA	0	0	14.7	TCGA-LL-A740-01	wtTP53
TCGA-LL-A7SZ	49	LumA	0	0	19.8	TCGA-LL-A7SZ-01	mTP53
TCGA-LL-A7T0	70	LumB	0	0	12.5333333333333	TCGA-LL-A7T0-01	wtTP53
TCGA-LL-A8F5	61	Basal	0	0	19.8666666666667	TCGA-LL-A8F5-01	mTP53
TCGA-LL-A9Q3	69	LumA	0	0	17.7333333333333	TCGA-LL-A9Q3-01	wtTP53
TCGA-OK-A5Q2	59	LumA	0	0	2.13333333333333	TCGA-OK-A5Q2-01	wtTP53
TCGA-OL-A5D7	70	Basal	0	0	59.3333333333333	TCGA-OL-A5D7-01	mTP53
TCGA-OL-A5D8	40	LumA	0	0	32.4333333333333	TCGA-OL-A5D8-01	wtTP53
TCGA-OL-A5DA	61	LumA	0	0	59.4333333333333	TCGA-OL-A5DA-01	wtTP53
TCGA-OL-A5RU	63	LumA	0	0	40.6333333333333	TCGA-OL-A5RU-01	wtTP53
TCGA-OL-A5RV	43	LumA	0	0	35.4	TCGA-OL-A5RV-01	wtTP53
TCGA-OL-A5RW	40	Basal	0	0	36.8666666666667	TCGA-OL-A5RW-01	mTP53
TCGA-OL-A5RX	51	LumA	0	0	29.2666666666667	TCGA-OL-A5RX-01	wtTP53
TCGA-OL-A5RZ	57	Her2	0	0	22.6333333333333	TCGA-OL-A5RZ-01	wtTP53
TCGA-OL-A5S0	66	Basal	0	0	20.6666666666667	TCGA-OL-A5S0-01	wtTP53
TCGA-OL-A66I	36	Basal	0	0	23.8	TCGA-OL-A66I-01	mTP53
TCGA-OL-A66J	80	LumA	0	0	66.5333333333333	TCGA-OL-A66J-01	wtTP53
TCGA-OL-A66K	72	LumA	0	1	42.5	TCGA-OL-A66K-01	wtTP53
TCGA-OL-A66L	71	LumA	0	0	43.3666666666667	TCGA-OL-A66L-01	wtTP53
TCGA-OL-A66N	59	LumA	0	0	26.4	TCGA-OL-A66N-01	wtTP53
TCGA-OL-A66O	39	LumA	0	0	17.6	TCGA-OL-A66O-01	wtTP53
TCGA-OL-A66P	75	Her2	0	0	14.2666666666667	TCGA-OL-A66P-01	wtTP53
TCGA-OL-A6VO	43	Basal	0	0	28.6	TCGA-OL-A6VO-01	mTP53
TCGA-OL-A6VQ	49	LumA	0	0	20	TCGA-OL-A6VQ-01	wtTP53
TCGA-OL-A6VR	48	LumA	0	0	40.6666666666667	TCGA-OL-A6VR-01	wtTP53
TCGA-PE-A5DC	72	LumA	0	1	47.6666666666667	TCGA-PE-A5DC-01	wtTP53
TCGA-PE-A5DD	64	LumA	0	0	65.1	TCGA-PE-A5DD-01	wtTP53
TCGA-PE-A5DE	41	LumA	0	0	88.1666666666667	TCGA-PE-A5DE-01	mTP53
TCGA-PL-A8LV	54	Basal	0	0	-0.233333333333333	TCGA-PL-A8LV-01	mTP53
TCGA-PL-A8LX	35	LumA	0	0	0.166666666666667	TCGA-PL-A8LX-01	wtTP53
TCGA-PL-A8LZ	29	Basal	0	0	10.0666666666667	TCGA-PL-A8LZ-01	mTP53
TCGA-S3-A6ZF	64	LumB	0	0	19.0666666666667	TCGA-S3-A6ZF-01	wtTP53
TCGA-S3-A6ZG	71	LumA	0	0	18.7333333333333	TCGA-S3-A6ZG-01	wtTP53
TCGA-S3-A6ZH	29	LumA	0	0	21.3666666666667	TCGA-S3-A6ZH-01	wtTP53
TCGA-S3-AA0Z	63	Basal	0	0	20.9666666666667	TCGA-S3-AA0Z-01	mTP53
TCGA-S3-AA10	65	Basal	0	0	19.5333333333333	TCGA-S3-AA10-01	mTP53
TCGA-S3-AA11	67	LumA	0	0	14.0333333333333	TCGA-S3-AA11-01	wtTP53
TCGA-S3-AA12	82	LumA	0	0	19.1333333333333	TCGA-S3-AA12-01	wtTP53
TCGA-S3-AA14	47	LumA	0	0	17.6333333333333	TCGA-S3-AA14-01	wtTP53
TCGA-S3-AA15	51	Basal	0	0	17.5	TCGA-S3-AA15-01	wtTP53
TCGA-S3-AA17	64	LumB	0	0	14.1333333333333	TCGA-S3-AA17-01	wtTP53
TCGA-UL-AAZ6	73	LumA	0	0	17.2666666666667	TCGA-UL-AAZ6-01	wtTP53
TCGA-UU-A93S	63	Her2	0	1	3.86666666666667	TCGA-UU-A93S-01	mTP53
TCGA-V7-A7HQ	75	LumA	0	0	67.7666666666667	TCGA-V7-A7HQ-01	wtTP53
TCGA-W8-A86G	66	LumA	0	0	11.5666666666667	TCGA-W8-A86G-01	wtTP53
TCGA-WT-AB41	55	LumA	0	0	53.7	TCGA-WT-AB41-01	wtTP53
TCGA-WT-AB44	77	LumA	0	0	29.4333333333333	TCGA-WT-AB44-01	wtTP53
TCGA-XX-A899	46	LumA	0	0	15.5666666666667	TCGA-XX-A899-01	wtTP53
TCGA-XX-A89A	68	LumA	0	0	16.2666666666667	TCGA-XX-A89A-01	wtTP53
TCGA-Z7-A8R5	61	LumA	0	0	109.566666666667	TCGA-Z7-A8R5-01	wtTP53
TCGA-Z7-A8R6	46	LumB	0	0	108.533333333333	TCGA-Z7-A8R6-01	mTP53
