# Supplementary material for: Comparative Analysis of Gene Correlation Networks of Breast Cancer Patients Based on Mutations in TP53
Source: Biomolecules. 2022 Jul 13;12(7):979. doi: 10.3390/biom12070979 (PMC9313229; doi:10.3390/biom12070979)
Supplement: Supplementary file 1 [file biomolecules-12-00979-s001.zip › Supplementary Materials S2.xlsx]

## Sheet: DEG and C-index
Name	ENSG	logFC	AveExpr	t	P_Value	adj_P_Val	B	mTP53 C-index	wtTP53 C-index
LASP1	ENSG00000002834	-0.4004	5.6368	6.7643	0	0	14.416	0.551	0.5361
SLC25A5	ENSG00000005022	0.4735	7.3841	-11.5189	0	0	53.2835	0.555	0.5574
RPS20	ENSG00000008988	0.2985	7.8637	-5.6317	0	0	7.7427	0.5194	0.6126
BRCA1	ENSG00000012048	0.0434	0.9304	-0.5462	0.5851	0.6167	-7.6346	0.5378	0.5173
LTF	ENSG00000012223	-0.9233	0	3.7368	0.0002	0.0003	-0.8679	0.5374	0.5621
CD74	ENSG00000019582	0.0122	9.0564	-0.1543	0.8774	0.8891	-7.7718	0.5789	0.6194
RB1CC1	ENSG00000023287	0.234	3.454	-4.5455	0	0	2.4038	0.5251	0.5978
TMSB10	ENSG00000034510	0.6372	10.9258	-10.4355	0	0	43.0418	0.5027	0.5138
CDH1	ENSG00000039068	0.5955	5.714	-4.9482	0	0	4.2585	0.5248	0.5749
HSPA5	ENSG00000044574	0.2078	7.6346	-5.2085	0	0	5.5362	0.5422	0.5195
RAD51	ENSG00000051180	1.1779	1.4838	-17.385	0	0	119.156	0.5433	0.5673
CASP8	ENSG00000064012	-0.1261	1.9648	2.685	0.0074	0.0105	-4.1975	0.5145	0.5046
YBX1	ENSG00000065978	0.8827	7.3174	-18.3235	0	0	130.909	0.5108	0.5247
NUCKS1	ENSG00000069275	-0.0141	6.3164	0.3398	0.7341	0.7591	-7.726	0.5354	0.5826
PABPC1	ENSG00000070756	0.7198	8.3727	-13.5643	0	0	74.4645	0.5012	0.5132
HMMR	ENSG00000072571	0.9883	1.7156	-12.519	0	0	63.3572	0.5184	0.5512
TSG101	ENSG00000074319	-0.2634	4.3004	8.2146	0	0	24.5127	0.5175	0.5067
CA12	ENSG00000074410	-2.7708	4.6943	18.1535	0	0	128.762	0.5446	0.5764
ENO1	ENSG00000074800	0.9255	7.759	-18.3353	0	0	131.059	0.5605	0.5422
ACTB	ENSG00000075624	0.2866	10.5618	-7.9942	0	0	22.8711	0.5648	0.5151
HSP90AA1	ENSG00000080824	0.3136	8.0998	-6.2829	0	0	11.4451	0.5381	0.575
PALB2	ENSG00000083093	-0.0194	2.1383	0.4758	0.6344	0.6635	-7.6706	0.5084	0.5539
RPS5	ENSG00000083845	-0.0626	7.0164	1.2207	0.2226	0.2571	-7.0397	0.528	0.6244
GSTP1	ENSG00000084207	0.9985	6.1152	-9.9409	0	0	38.6172	0.5209	0.5385
CD59	ENSG00000085063	0.0344	6.3842	-0.5933	0.5532	0.5853	-7.6078	0.5187	0.5243
RAD54L	ENSG00000085999	1.4209	0.8985	-17.9051	0	0	125.639	0.5376	0.5493
CEACAM6	ENSG00000086548	-1.436	0	5.8747	0	0	9.0816	0.5799	0.5851
FTL	ENSG00000087086	0.3523	10.882	-7.0086	0	0	15.9979	0.5117	0.5186
GNAS	ENSG00000087460	0.4357	6.7305	-9.5852	0	0	35.5373	0.5048	0.5502
RPLP0	ENSG00000089157	0.0345	8.3678	-0.7493	0.4539	0.4894	-7.5032	0.51	0.6688
CHGB	ENSG00000089199	-0.1328	0	0.6917	0.4893	0.5251	-7.5138	0.5664	0.564
PEBP1	ENSG00000089220	-0.1288	7.5329	3.2086	0.0014	0.0021	-2.6731	0.5013	0.5303
FXYD3	ENSG00000089356	-0.3859	5.5918	4.03	0.0001	0.0001	0.2473	0.5484	0.5732
LYZ	ENSG00000090382	0.8453	5.6222	-6.8663	0	0	15.0703	0.5356	0.5321
ESR1	ENSG00000091831	-3.8196	3.2319	19.635	0	0	147.715	0.5445	0.5228
PHGDH	ENSG00000092621	1.6728	3.1559	-15.2979	0	0	94.0294	0.5545	0.5897
EZR	ENSG00000092820	-0.2121	6.8932	4.4286	0	0	1.8929	0.5601	0.5521
BAMBI	ENSG00000095739	0.3049	4.4844	-2.3771	0.0177	0.024	-4.9701	0.556	0.5109
CRISP3	ENSG00000096006	0.8372	0	-3.0329	0.0025	0.0037	-3.1832	0.5439	0.5052
HSP90AB1	ENSG00000096384	0.3718	9.1179	-9.0021	0	0	30.6794	0.5188	0.6825
DSP	ENSG00000096696	0.084	5.9719	-0.8664	0.3866	0.429	-7.4087	0.5344	0.5988
SCD	ENSG00000099194	0.4377	6.3616	-3.8479	0.0001	0.0002	-0.4553	0.508	0.5478
LGALS1	ENSG00000100097	0.0901	8.0014	-1.3844	0.1666	0.2001	-6.827	0.516	0.5157
RPL3	ENSG00000100316	-0.2565	8.5734	5.3676	0	0	6.3468	0.531	0.5795
MYH9	ENSG00000100345	0.1531	7.2344	-3.3881	0.0007	0.0011	-2.0898	0.516	0.5093
CHGA	ENSG00000100604	0.0488	0	-0.2448	0.8067	0.8285	-7.6824	0.588	0.5841
MMP9	ENSG00000100985	1.0085	4.3844	-7.5834	0	0	19.9119	0.5557	0.517
CTSZ	ENSG00000101160	0.3075	6.8812	-6.1053	0	0	10.3992	0.5314	0.5096
EEF1A2	ENSG00000101210	-1.9456	3.2153	8.8166	0	0	29.1852	0.5108	0.5993
WFDC2	ENSG00000101443	-1.0974	0	5.5877	0	0	7.5063	0.5177	0.5195
PLP2	ENSG00000102007	0.3837	6.6331	-7.4173	0	0	18.7531	0.503	0.538
PGK1	ENSG00000102144	0.6038	6.3279	-13.0367	0	0	68.7878	0.6351	0.6722
TIMP1	ENSG00000102265	-0.2816	7.4707	4.5275	0	0	2.3241	0.5434	0.5703
MAGED2	ENSG00000102316	-1.0759	7.5613	14.3357	0	0	83.0046	0.5113	0.513
OLFM4	ENSG00000102837	0.3019	0	-1.1545	0.2487	0.2857	-7.092	0.5642	0.6669
SLC7A5	ENSG00000103257	1.9161	4.015	-18.9774	0	0	139.237	0.5158	0.6267
CA2	ENSG00000104267	-0.281	3.2556	2.0665	0.0391	0.0501	-5.6553	0.5184	0.5389
NBN	ENSG00000104320	0.1137	4.0546	-2.3114	0.0211	0.0284	-5.1229	0.5253	0.5209
LAPTM4B	ENSG00000104341	1.2439	5.6484	-15.2755	0	0	93.7681	0.5168	0.5262
PLAT	ENSG00000104368	-1.3776	3.5319	12.5508	0	0	63.6867	0.5082	0.5531
RPS16	ENSG00000105193	0.2003	7.6766	-3.6423	0.0003	0.0005	-1.211	0.5303	0.6347
RPS19	ENSG00000105372	0.2752	7.4226	-4.5789	0	0	2.552	0.5086	0.6387
CHCHD2	ENSG00000106153	0.2443	7.459	-5.7918	0	0	8.6189	0.5429	0.5534
HSPB1	ENSG00000106211	-0.5185	7.7603	5.4894	0	0	6.9832	0.5655	0.5018
TSPAN13	ENSG00000106537	-0.9082	6.6899	12.2381	0	0	60.4708	0.5677	0.529
AGR2	ENSG00000106541	-3.3808	5.6758	15.1829	0	0	92.6912	0.5158	0.5633
AEBP1	ENSG00000106624	-0.4547	6.9085	5.0984	0	0	4.9883	0.5092	0.5099
GATA3	ENSG00000107485	-2.4895	6.4837	19.0544	0	0	140.226	0.5237	0.562
RPL19	ENSG00000108298	0.0882	8.6851	-1.375	0.1695	0.203	-6.8399	0.5212	0.5997
PSMD3	ENSG00000108344	0.4139	5.0544	-5.6702	0	0	7.9513	0.5128	0.5068
PFN1	ENSG00000108518	0.2974	8.0315	-7.1901	0	0	17.2046	0.5116	0.5154
LGALS3BP	ENSG00000108679	-0.0146	7.2019	0.1913	0.8483	0.8635	-7.7654	0.5949	0.529
COL1A1	ENSG00000108821	-0.6404	9.0504	6.3776	0	0	12.0143	0.5105	0.5345
LRRC59	ENSG00000108829	0.4286	5.336	-8.2143	0	0	24.5103	0.5096	0.5766
YWHAE	ENSG00000108953	0.0005	7.0677	-0.0131	0.9895	0.9895	-7.7836	0.5166	0.619
SLC9A3R1	ENSG00000109062	-0.5776	6.7256	6.9621	0	0	15.6928	0.5407	0.5169
AREG	ENSG00000109321	-1.1759	2.6885	6.2452	0	0	11.2209	0.5186	0.6277
TBC1D9	ENSG00000109436	-2.3567	5.2762	21.1659	0	0	167.789	0.5222	0.5627
HSPA8	ENSG00000109971	0.2358	7.9146	-4.7137	0	0	3.1606	0.556	0.6067
CCND1	ENSG00000110092	-1.0847	5.9769	10.5744	0	0	44.3135	0.502	0.5186
PRPF19	ENSG00000110107	0.047	6.0637	-1.3284	0.1845	0.2176	-6.9028	0.5119	0.5814
SCGB2A2	ENSG00000110484	-3.1511	0	8.8174	0	0	29.168	0.5703	0.528
MDK	ENSG00000110492	0.3852	5.9083	-4.3669	0	0	1.6285	0.5859	0.5237
SLC22A18	ENSG00000110628	-0.8905	1.8671	12.1039	0	0	59.107	0.5181	0.5004
RPS13	ENSG00000110700	-0.1125	7.2867	2.5307	0.0116	0.016	-4.5962	0.5019	0.6135
KRT18	ENSG00000111057	-0.8297	7.5802	10.3922	0	0	42.648	0.5347	0.5006
MGP	ENSG00000111341	-0.8282	8.6607	5.8985	0	0	9.215	0.5584	0.604
ARHGDIB	ENSG00000111348	-0.5134	6.761	8.034	0	0	23.1648	0.5342	0.6333
GAPDH	ENSG00000111640	0.7225	9.4185	-13.2194	0	0	70.7376	0.5067	0.5303
LDHB	ENSG00000111716	1.238	5.356	-12.5429	0	0	63.6042	0.5326	0.5728
RPS12	ENSG00000112306	0.1889	9.848	-3.4666	0.0006	0.0009	-1.8247	0.5139	0.6128
EXOC2	ENSG00000112685	-0.4583	3.5516	7.3514	0	0	18.3	0.5336	0.5191
SPARC	ENSG00000113140	-0.6062	8.852	7.685	0	0	20.6313	0.5313	0.5216
STC2	ENSG00000113739	-2.4199	4.576	16.24	0	0	105.181	0.5024	0.6435
FN1	ENSG00000115414	0.0132	7.7582	-0.1318	0.8952	0.9031	-7.775	0.5015	0.5281
IGFBP5	ENSG00000115461	-0.5899	6.7712	4.6557	0	0	2.8964	0.5113	0.5573
SDC1	ENSG00000115884	0.3957	6.5674	-4.8077	0	0	3.5946	0.5831	0.5619
DHCR24	ENSG00000116133	-0.4357	7.131	5.345	0	0	6.2307	0.5401	0.5438
PRDX1	ENSG00000117450	0.4762	7.8447	-10.8285	0	0	46.6724	0.5821	0.5391
TSPAN1	ENSG00000117472	-2.185	3.8726	13.4161	0	0	72.8556	0.5331	0.5647
CTSD	ENSG00000117984	-0.1058	8.1627	1.4813	0.1389	0.1681	-6.6885	0.5334	0.5519
RPS25	ENSG00000118181	0.0815	8.0384	-1.7659	0.0778	0.0967	-6.2282	0.5548	0.6403
CTGF	ENSG00000118523	-0.3266	6.8005	3.4203	0.0007	0.001	-1.9819	0.5236	0.5669
MYL12B	ENSG00000118680	0.0112	7.8582	-0.3035	0.7616	0.784	-7.7377	0.5482	0.6563
RPN2	ENSG00000118705	0.3552	7.3401	-9.3514	0	0	33.5603	0.5146	0.5906
SPP1	ENSG00000118785	0.6649	6.026	-5.1334	0	0	5.1612	0.5425	0.5071
EPCAM	ENSG00000119888	0.5827	0	-9.0508	0	0	31.0736	0.5041	0.6338
DUSP1	ENSG00000120129	-0.8774	5.6604	9.0482	0	0	31.0544	0.5177	0.5741
EGR1	ENSG00000120738	-0.8476	5.5275	7.7373	0	0	21.0046	0.5119	0.5943
CLU	ENSG00000120885	-0.614	6.1488	5.6085	0	0	7.6175	0.554	0.5985
FABP3	ENSG00000121769	-0.0423	2.528	0.4944	0.6212	0.6513	-7.6616	0.516	0.5046
TNFSF10	ENSG00000121858	-0.4422	5.5471	4.7472	0	0	3.3141	0.5547	0.5835
PIK3CA	ENSG00000121879	0.1595	1.9561	-3.1205	0.0019	0.0028	-2.948	0.5126	0.5194
CXCR4	ENSG00000121966	0.3618	5.1742	-4.8972	0	0	4.0155	0.5225	0.5111
FMOD	ENSG00000122176	-1.08	4.7633	10.3459	0	0	42.2282	0.5257	0.5349
CKS2	ENSG00000123975	0.8862	5.6192	-14.1176	0	0	80.5619	0.5358	0.5429
PI3	ENSG00000124102	2.2539	0	-9.7187	0	0	36.5198	0.5073	0.6125
SLPI	ENSG00000124107	1.5237	0	-8.2047	0	0	24.4361	0.5345	0.5367
SDC4	ENSG00000124145	-0.3419	6.7576	5.951	0	0	9.5119	0.5179	0.5654
PIGT	ENSG00000124155	-0.3472	6.4835	7.0247	0	0	16.1039	0.5291	0.6062
NQO2	ENSG00000124588	0.163	1.6701	-3.4828	0.0005	0.0008	-1.7696	0.5956	0.5333
SCGB1D2	ENSG00000124935	-2.9219	0	9.1623	0	0	31.9503	0.5704	0.5234
SCGB2A1	ENSG00000124939	-1.0805	0	4.5768	0	0	2.5554	0.5908	0.529
MT2A	ENSG00000125148	0.4225	6.2592	-5.1106	0	0	5.0487	0.6073	0.5416
PPDPF	ENSG00000125534	-0.2436	7.8388	3.934	0.0001	0.0002	-0.1269	0.5037	0.5188
RPL23	ENSG00000125691	-0.1446	6.7113	2.5442	0.0112	0.0155	-4.5623	0.5499	0.587
C3	ENSG00000125730	-0.0448	5.6176	0.4513	0.6519	0.6803	-7.6819	0.55	0.621
DSTN	ENSG00000125868	-0.2042	7.0208	4.6413	0	0	2.8315	0.6272	0.5806
XRCC3	ENSG00000126215	0.0704	0.5604	-1.328	0.1846	0.2176	-6.9033	0.5404	0.6
COX6B1	ENSG00000126267	0.2031	7.2933	-4.3513	0	0	1.5624	0.5372	0.5438
IFI6	ENSG00000126709	0.4382	7.7381	-3.4285	0.0006	0.001	-1.9542	0.517	0.5426
ZFP36	ENSG00000128016	-0.5881	5.7373	6.7761	0	0	14.491	0.5375	0.6225
KRT17	ENSG00000128422	0.7973	3.8255	-3.5457	0.0004	0.0007	-1.552	0.5209	0.6456
HERC2	ENSG00000128731	-0.1501	1.7652	3.3819	0.0008	0.0012	-2.1102	0.5002	0.5505
KLK14	ENSG00000129437	0.7572	0	-4.0911	0	0.0001	0.4937	0.5081	0.6227
SAT1	ENSG00000130066	0.2053	6.4463	-3.6614	0.0003	0.0004	-1.1423	0.5987	0.6197
APOE	ENSG00000130203	0.1676	6.5266	-1.7952	0.073	0.0913	-6.1763	0.5011	0.5568
BST2	ENSG00000130303	-0.3324	7.0896	3.0675	0.0022	0.0033	-3.1098	0.5786	0.5792
SH3BGRL	ENSG00000131171	-0.8764	6.7535	10.241	0	0	41.2827	0.5386	0.5553
PPT1	ENSG00000131238	-0.2821	6.4396	5.8396	0	0	8.8844	0.5748	0.5386
RPL27	ENSG00000131469	-0.1371	7.7595	3.0297	0.0025	0.0037	-3.2238	0.5027	0.6506
PPP1R1B	ENSG00000131771	0.5308	0	-2.3587	0.0186	0.0252	-5.0126	0.5208	0.549
EIF5A	ENSG00000132507	0.3598	6.8273	-8.8792	0	0	29.6864	0.5138	0.5545
PCNA	ENSG00000132646	0.5525	6.3082	-11.4046	0	0	52.1681	0.5025	0.5669
ALDH3B2	ENSG00000132746	-0.5692	0	3.5944	0.0003	0.0005	-1.3785	0.5381	0.5101
CHI3L1	ENSG00000133048	1.4181	3.3572	-9.0449	0	0	31.0278	0.5578	0.6317
POSTN	ENSG00000133110	-0.6407	7.3258	5.9676	0	0	9.6065	0.5202	0.55
TPT1	ENSG00000133112	-0.3186	8.2107	7.3454	0	0	18.2588	0.522	0.6369
TCEAL4	ENSG00000133142	-0.9788	5.6889	14.999	0	0	90.5625	0.5809	0.557
BEX1	ENSG00000133169	-1.0532	0	4.1909	0	0.0001	0.9161	0.5621	0.5712
RARRES3	ENSG00000133321	-0.8992	6.011	7.7155	0	0	20.8489	0.5269	0.6111
KRAS	ENSG00000133703	0.0365	3.0673	-0.7795	0.4359	0.4745	-7.4801	0.5269	0.5186
BHLHE40	ENSG00000134107	-1.0458	6.5695	15.2224	0	0	93.15	0.5094	0.5917
VTCN1	ENSG00000134258	-0.1943	4.4869	1.0601	0.2895	0.3284	-7.2225	0.5519	0.5373
LDHA	ENSG00000134333	0.3646	6.6316	-7.7643	0	0	21.1984	0.5025	0.5152
IL6ST	ENSG00000134352	-1.7738	5.2283	20.0791	0	0	153.493	0.5155	0.6156
CSN2	ENSG00000135222	0.39	0	-0.8288	0.4085	0.449	-6.6374	0.5108	0.5076
CGA	ENSG00000135346	-1.1533	0	3.9321	0.0001	0.0002	-0.0289	0.5552	0.5218
CD63	ENSG00000135404	-0.2736	7.6432	6.7744	0	0	14.4804	0.5074	0.5333
LACRT	ENSG00000135413	-0.9072	0	2.4951	0.0131	0.018	-4.2877	0.5444	0.5511
KRT7	ENSG00000135480	0.8715	6.0337	-5.8791	0	0	9.1058	0.5025	0.5318
CD164	ENSG00000135535	-0.3046	6.0755	5.9116	0	0	9.289	0.5288	0.5836
GLUL	ENSG00000135821	-1.011	6.8236	16.1326	0	0	103.893	0.5721	0.6422
BRIP1	ENSG00000136492	0.713	0.191	-8.4546	0	0	26.3431	0.5794	0.5553
ATP6V1G1	ENSG00000136888	-0.2433	6.77	6.1627	0	0	10.734	0.5917	0.5062
RPL35	ENSG00000136942	0.0577	7.7842	-1.0213	0.3074	0.3471	-7.2627	0.5159	0.5944
RPS6	ENSG00000137154	-0.0814	9.0596	1.5348	0.1252	0.152	-6.6081	0.5209	0.6219
MMP7	ENSG00000137673	1.3424	0	-7.6991	0	0	20.7309	0.505	0.6833
RPLP1	ENSG00000137818	-0.2207	8.4383	4.0772	0.0001	0.0001	0.4345	0.5261	0.5978
RPS24	ENSG00000138326	0.0121	7.6373	-0.2372	0.8126	0.8327	-7.7556	0.5457	0.6094
BARD1	ENSG00000138376	0.2487	1.5576	-4.2956	0	0	1.3274	0.5537	0.505
SLC40A1	ENSG00000138449	-1.5981	5.2351	11.3967	0	0	52.0921	0.5617	0.6662
CXCL9	ENSG00000138755	1.1892	3.9971	-7.1772	0	0	17.1178	0.5944	0.5351
SCARB2	ENSG00000138760	-0.1355	5.7837	3.168	0.0016	0.0024	-2.8006	0.5087	0.6283
LUM	ENSG00000139329	-0.5622	7.5055	5.7686	0	0	8.4906	0.5357	0.5132
BRCA2	ENSG00000139618	0.7429	-0.2246	-10.6419	0	0	44.9366	0.5092	0.5164
IGF1R	ENSG00000140443	-1.3513	3.3528	12.32	0	0	61.308	0.5377	0.6188
RPS2	ENSG00000140988	0.0663	8.5917	-1.2627	0.2071	0.2404	-6.9876	0.515	0.636
TOB1	ENSG00000141232	-0.727	5.6728	9.269	0	0	32.8731	0.5035	0.5145
CLTC	ENSG00000141367	-0.0202	5.7913	0.3509	0.7258	0.7522	-7.7222	0.5115	0.5713
SLC39A6	ENSG00000141424	-1.9836	7.1022	18.3108	0	0	130.749	0.5065	0.538
TP53	ENSG00000141510	-0.2735	4.249	4.1307	0	0.0001	0.6489	0.5322	0.562
ERBB2	ENSG00000141736	-0.1508	5.2868	1.3217	0.1867	0.2195	-6.9116	0.5082	0.5293
GRB7	ENSG00000141738	0.276	3.2057	-2.5613	0.0106	0.0148	-4.519	0.5217	0.545
MIEN1	ENSG00000141741	0.2913	4.4601	-3.2077	0.0014	0.0021	-2.6759	0.5158	0.5519
PNMT	ENSG00000141744	-0.4723	0	2.0999	0.0361	0.0468	-5.5678	0.505	0.5242
IGFBP4	ENSG00000141753	-1.1152	7.9384	15.3166	0	0	94.2466	0.5108	0.6838
IFITM3	ENSG00000142089	-0.0816	8.1521	1.0802	0.2804	0.3198	-7.201	0.5283	0.5555
COL6A2	ENSG00000142173	-0.3246	7.0351	3.9342	0.0001	0.0002	-0.1261	0.5177	0.5632
APP	ENSG00000142192	0.214	7.4049	-3.6322	0.0003	0.0005	-1.2469	0.5067	0.5012
AKT1	ENSG00000142208	-0.0965	3.9583	2.2692	0.0235	0.0313	-5.2188	0.501	0.5886
RPS11	ENSG00000142534	-0.0364	9.494	0.7916	0.4288	0.469	-7.4706	0.5063	0.6284
RPL13A	ENSG00000142541	-0.1905	9.2891	3.649	0.0003	0.0005	-1.187	0.5114	0.6443
RPL11	ENSG00000142676	-0.0555	8.3958	1.2218	0.2222	0.2571	-7.0383	0.5226	0.6135
RPS8	ENSG00000142937	0.0462	8.363	-0.9231	0.3563	0.3983	-7.358	0.5112	0.6114
ATP1B1	ENSG00000143153	-0.4093	5.9009	4.6157	0	0	2.7163	0.5339	0.5337
CRABP2	ENSG00000143320	-0.7018	8.1495	5.6511	0	0	7.8476	0.5398	0.5832
ECM1	ENSG00000143369	-0.903	4.0877	7.6764	0	0	20.5698	0.5661	0.6526
S100A8	ENSG00000143546	2.2786	2.3999	-11.3351	0	0	51.4944	0.5448	0.509
S100A7	ENSG00000143556	1.6653	0	-4.5944	0	0	2.6804	0.5831	0.5351
ILF2	ENSG00000143621	0.4575	6.9105	-11.2073	0	0	50.263	0.5468	0.5145
SRP9	ENSG00000143742	-0.1864	7.0793	4.653	0	0	2.8846	0.5384	0.5687
RHOB	ENSG00000143878	-1.311	7.2738	18.313	0	0	130.777	0.5089	0.5938
HSPD1	ENSG00000144381	0.6512	6.4062	-14.0913	0	0	80.2691	0.5208	0.5861
RPL32	ENSG00000144713	-0.0343	7.5948	0.7116	0.4769	0.513	-7.5307	0.5136	0.6102
SFRP2	ENSG00000145423	-0.9783	7.4349	8.7352	0	0	28.5379	0.5544	0.5803
RPS3A	ENSG00000145425	-0.2039	7.3478	4.4591	0	0	2.0249	0.5284	0.6449
CXCL14	ENSG00000145824	-1.7649	5.2808	10.3838	0	0	42.5724	0.5098	0.6737
ARMT1	ENSG00000146476	-1.0623	4.5131	10.9495	0	0	47.8095	0.5125	0.5081
CCT6A	ENSG00000146731	0.5409	5.9064	-13.5574	0	0	74.3893	0.5401	0.6333
RPL7	ENSG00000147604	0.2091	7.8815	-3.9363	0.0001	0.0002	-0.118	0.5173	0.5747
MAL2	ENSG00000147676	0.2774	6.2927	-3.5349	0.0004	0.0007	-1.5897	0.5139	0.5388
RPL7A	ENSG00000148303	-0.16	8.7987	3.6954	0.0002	0.0004	-1.0196	0.5049	0.587
PTGES	ENSG00000148344	-0.483	3.9868	4.6268	0	0	2.7664	0.5469	0.7089
LCN2	ENSG00000148346	1.4521	0	-6.8917	0	0	15.2324	0.5218	0.6632
RPS3	ENSG00000149273	0.1044	7.4126	-1.7898	0.0739	0.0921	-6.1859	0.5041	0.6239
ATM	ENSG00000149311	-0.1511	1.0843	2.558	0.0107	0.0149	-4.5274	0.5355	0.5126
ALDOA	ENSG00000149925	-0.0719	7.8046	1.2971	0.195	0.2287	-6.9437	0.5775	0.5386
THRSP	ENSG00000151365	-1.0505	0	5.288	0	0	5.9403	0.5333	0.6197
GFRA1	ENSG00000151892	-3.5293	0	15.611	0	0	97.663	0.5001	0.6014
TMEM123	ENSG00000152558	0.6995	5.9519	-11.6275	0	0	54.3489	0.524	0.509
GJA1	ENSG00000152661	-0.9085	5.5325	8.1643	0	0	24.1345	0.522	0.5963
CPB1	ENSG00000153002	-3.7201	0	11.4628	0	0	52.6454	0.5192	0.5974
CXCL13	ENSG00000156234	1.2717	2.2786	-6.1777	0	0	10.8222	0.6093	0.5547
RPL30	ENSG00000156482	0.3746	7.4015	-7.6819	0	0	20.6093	0.5136	0.5843
EEF1A1	ENSG00000156508	-0.2186	9.597	5.4726	0	0	6.8946	0.5106	0.5181
SUSD3	ENSG00000157303	-2.4357	4.1808	16.5497	0	0	108.918	0.5623	0.6435
TAGLN2	ENSG00000158710	0.3843	8.2099	-7.7799	0	0	21.3103	0.601	0.5397
ATP5MC1	ENSG00000159199	0.2548	4.3047	-4.2055	0	0.0001	0.9537	0.5739	0.532
CLIC6	ENSG00000159212	-2.1189	1.534	10.2185	0	0	41.0809	0.5085	0.6907
PTMS	ENSG00000159335	-0.0085	7.5472	0.1243	0.9011	0.9071	-7.776	0.5771	0.55
BTG2	ENSG00000159388	-1.7172	6.0078	20.8402	0	0	163.483	0.561	0.6641
PIP	ENSG00000159763	-2.9991	0	10.2467	0	0	41.2921	0.5524	0.5148
TFF3	ENSG00000160180	-4.0201	0	17.1915	0	0	116.692	0.5018	0.5416
TFF1	ENSG00000160182	-4.8056	0	17.4595	0	0	118.992	0.5054	0.6031
CSTB	ENSG00000160213	0.7681	5.8414	-13.0333	0	0	68.7519	0.5271	0.5312
AZGP1	ENSG00000160862	-1.4701	7.5816	9.3696	0	0	33.7127	0.5831	0.5305
LY6E	ENSG00000160932	0.8461	6.6631	-9.3701	0	0	33.7171	0.5094	0.5334
RPL8	ENSG00000161016	0.3109	9.3029	-5.0167	0	0	4.5891	0.5046	0.5346
PGAP3	ENSG00000161395	-0.1059	3.8326	1.1462	0.2521	0.2889	-7.1277	0.5131	0.5192
DCD	ENSG00000161634	0.114	0	-0.3093	0.7572	0.7812	-7.5061	0.5921	0.5118
RPL26	ENSG00000161970	-0.232	6.6245	4.9611	0	0	4.3206	0.542	0.5728
ACTG2	ENSG00000163017	0.32	1.8623	-1.9128	0.0561	0.0708	-5.9593	0.5261	0.6034
S100A11	ENSG00000163191	0.5059	9.4893	-8.5078	0	0	26.7547	0.5674	0.5323
S100A9	ENSG00000163220	2.002	5.2095	-10.1094	0	0	40.1061	0.5631	0.5296
ABRAXAS1	ENSG00000163322	-0.5441	0.0589	11.1728	0	0	49.9321	0.5219	0.5379
NPY1R	ENSG00000164128	-2.679	0	11.1366	0	0	49.5819	0.5698	0.5824
CARTPT	ENSG00000164326	-0.96	0	2.1038	0.0362	0.0468	-5.0997	0.5238	0.5252
FABP7	ENSG00000164434	2.8159	0	-9.9722	0	0	38.5492	0.5667	0.6449
COL1A2	ENSG00000164692	-0.6442	8.4033	6.4281	0	0	12.3207	0.5188	0.5111
COX6C	ENSG00000164919	-0.8239	6.549	8.5109	0	0	26.7786	0.53	0.521
YWHAZ	ENSG00000164924	0.6052	6.8753	-12.6559	0	0	64.7789	0.5285	0.5414
CRABP1	ENSG00000166426	2.2181	0	-8.9147	0	0	29.919	0.5061	0.5163
CLEC3A	ENSG00000166509	-2.0949	0	4.6825	0	0	3.0947	0.6281	0.6073
HSP90B1	ENSG00000166598	0.3356	7.5784	-9.3191	0	0	33.2903	0.5077	0.5981
B2M	ENSG00000166710	0.2595	9.1219	-4.0362	0.0001	0.0001	0.2718	0.5472	0.504
YWHAB	ENSG00000166913	0.0244	6.765	-0.7816	0.4347	0.4743	-7.4785	0.5194	0.5604
PHB	ENSG00000167085	0.2866	4.816	-5.2396	0	0	5.6929	0.5651	0.5778
IGF2	ENSG00000167244	-1.1953	3.1419	9.6722	0	0	36.2825	0.5449	0.5698
GPX4	ENSG00000167468	-0.2851	6.7483	5.404	0	0	6.5358	0.5524	0.5817
LY6D	ENSG00000167656	2.2156	0	-8.6302	0	0	27.5278	0.5606	0.5169
EEF2	ENSG00000167658	-0.337	9.0641	7.5684	0	0	19.806	0.5079	0.5488
KLK5	ENSG00000167754	0.9191	0	-3.6864	0.0002	0.0004	-1.025	0.5248	0.6503
FTH1	ENSG00000167996	-0.0096	8.181	0.2214	0.8249	0.8434	-7.7592	0.5053	0.558
COL3A1	ENSG00000168542	-0.6287	8.9672	6.0958	0	0	10.3439	0.5176	0.5235
NDUFS5	ENSG00000168653	0.3453	7.6906	-6.8543	0	0	14.993	0.5168	0.5266
SLC25A6	ENSG00000169100	0.01	7.3784	-0.1878	0.8511	0.8644	-7.7661	0.5065	0.541
CXCL10	ENSG00000169245	1.4707	4.5673	-10.9883	0	0	48.1763	0.5586	0.5173
CD52	ENSG00000169442	0.1759	3.9316	-1.6097	0.1079	0.1316	-6.4909	0.5601	0.6586
HINT1	ENSG00000169567	-0.0591	6.3556	1.359	0.1745	0.2076	-6.8617	0.5089	0.5129
FASN	ENSG00000169710	-0.3381	6.1851	3.2734	0.0011	0.0017	-2.4661	0.5097	0.5521
SERPINA6	ENSG00000170099	-1.6722	0	4.787	0	0	3.5878	0.5079	0.5553
UBB	ENSG00000170315	-0.0846	8.1228	2.1281	0.0336	0.0439	-5.5268	0.5523	0.5225
FOS	ENSG00000170345	-1.0909	5.2767	8.8663	0	0	29.5834	0.5295	0.6313
CST5	ENSG00000170367	-1.7159	0	5.0182	0	0	4.7562	0.5555	0.5339
KRT8	ENSG00000170421	-0.4912	7.6379	5.907	0	0	9.2628	0.5254	0.5518
ARL6IP1	ENSG00000170540	0.1263	6.4574	-2.7549	0.006	0.0086	-4.0095	0.5402	0.5367
PPM1D	ENSG00000170836	-0.0844	1.9242	1.6604	0.0972	0.1196	-6.4082	0.547	0.6048
TRH	ENSG00000170893	-1.8285	0	9.0847	0	0	31.1954	0.5712	0.6606
SMR3B	ENSG00000171201	0.7723	0	-1.9873	0.0478	0.0605	-5.3401	0.595	0.5691
CSN3	ENSG00000171209	2.0189	0	-4.9553	0	0	4.4643	0.534	0.6077
KRT19	ENSG00000171345	-0.6717	8.8989	6.1798	0	0	10.8347	0.5006	0.5352
NAT1	ENSG00000171428	-3.416	3.5938	20.1609	0	0	154.562	0.5335	0.5959
RPS21	ENSG00000171858	0.2306	8.1626	-4.0719	0.0001	0.0001	0.4132	0.5107	0.5762
PTEN	ENSG00000171862	-0.4055	3.0965	8.1022	0	0	23.6704	0.5117	0.53
ORMDL3	ENSG00000172057	-0.1438	4.885	1.7319	0.0837	0.1038	-6.2874	0.5218	0.5083
MUCL1	ENSG00000172551	-0.3237	0	1.0148	0.3105	0.3497	-7.259	0.5655	0.5075
CCL19	ENSG00000172724	-0.1229	0	0.6019	0.5474	0.5806	-7.6019	0.5177	0.6606
SAA1	ENSG00000173432	-0.0061	0	0.0326	0.974	0.9762	-7.7818	0.5263	0.7052
AGR3	ENSG00000173467	-4.7464	0	19.7708	0	0	148.746	0.5135	0.5869
EIF1	ENSG00000173812	-0.1185	6.997	3.6507	0.0003	0.0005	-1.1808	0.5225	0.5463
RPL4	ENSG00000174444	0.0239	7.6823	-0.5456	0.5855	0.6167	-7.6349	0.5198	0.6117
MARCKSL1	ENSG00000175130	0.2418	7.7168	-4.7518	0	0	3.3357	0.5133	0.6082
A2M	ENSG00000175899	-0.0473	6.4979	0.6626	0.5078	0.5424	-7.5643	0.5644	0.5616
COX8A	ENSG00000176340	0.1097	7.6478	-2.3011	0.0217	0.029	-5.1464	0.52	0.5491
TCIM	ENSG00000176907	-1.0965	4.1828	8.6628	0	0	27.9656	0.5283	0.5647
RPLP2	ENSG00000177600	0.0358	8.1228	-0.618	0.5368	0.5706	-7.5929	0.511	0.6163
RPS27	ENSG00000177954	-0.1113	9.4077	2.4707	0.0137	0.0188	-4.745	0.5303	0.6061
CALML5	ENSG00000178372	2.0631	0	-7.6468	0	0	20.3559	0.5271	0.5003
GRINA	ENSG00000178719	0.0859	6.9036	-1.665	0.0963	0.1188	-6.4007	0.5492	0.5539
TUFM	ENSG00000178952	-0.0638	6.5695	1.5985	0.1104	0.1343	-6.5088	0.5371	0.5827
MRFAP1	ENSG00000179010	-0.3681	6.8338	10.3536	0	0	42.2985	0.5381	0.5799
CALR	ENSG00000179218	0.525	8.4397	-12.733	0	0	65.5853	0.5298	0.5448
ALOX15B	ENSG00000179593	-0.7524	1.1499	3.8696	0.0001	0.0002	-0.3732	0.5739	0.5851
SEPHS2	ENSG00000179918	-0.076	5.7288	1.4413	0.1499	0.1809	-6.7468	0.576	0.5306
SHISA2	ENSG00000180730	-1.4829	2.0409	8.1541	0	0	24.0581	0.501	0.584
NQO1	ENSG00000181019	-0.3893	5.117	3.6851	0.0002	0.0004	-1.0569	0.5183	0.5635
NPM1	ENSG00000181163	0.0747	7.1938	-2.0272	0.043	0.0546	-5.7352	0.5207	0.5117
FDCSP	ENSG00000181617	1.5418	0	-5.4948	0	0	7.0227	0.5017	0.6458
BGN	ENSG00000182492	-0.1563	8.0852	2.1437	0.0324	0.0425	-5.4938	0.517	0.5709
CHEK2	ENSG00000183765	0.7997	1.632	-16.8714	0	0	112.835	0.5147	0.5075
ZNF703	ENSG00000183779	-1.6206	4.9092	15.8207	0	0	100.176	0.5344	0.5737
ACTG1	ENSG00000184009	0.0756	10.2509	-2.0606	0.0397	0.0507	-5.6674	0.6029	0.5734
SLITRK6	ENSG00000184564	-1.7991	0	8.0418	0	0	23.2186	0.5255	0.5189
CIB1	ENSG00000185043	-0.378	6.3075	7.1865	0	0	17.1805	0.5631	0.5664
DLK1	ENSG00000185559	0.6239	0	-1.9666	0.0498	0.0629	-5.6588	0.5076	0.5822
P4HB	ENSG00000185624	0.4163	7.4556	-9.3257	0	0	33.3457	0.5072	0.5272
KRT5	ENSG00000186081	0.7723	3.0785	-3.058	0.0023	0.0034	-3.1385	0.51	0.6647
CYP4Z1	ENSG00000186160	-2.856	0	10.0558	0	0	39.58	0.5984	0.5314
KRT16	ENSG00000186832	2.1063	0	-9.3101	0	0	33.2061	0.5091	0.5949
KRT14	ENSG00000186847	-0.2033	0	0.7571	0.4492	0.4855	-7.4941	0.5133	0.6755
PTMA	ENSG00000187514	0.3563	7.7955	-9.0746	0	0	31.27	0.6112	0.5107
ISG15	ENSG00000187608	0.5296	5.8621	-4.0471	0.0001	0.0001	0.3147	0.5015	0.5257
HIST1H1C	ENSG00000187837	0.1578	6.1682	-1.3471	0.1784	0.2113	-6.8778	0.5335	0.5616
TUBB4B	ENSG00000188229	0.0484	7.0688	-0.9831	0.3259	0.3652	-7.3009	0.5044	0.5314
SELL	ENSG00000188404	0.1313	2.0025	-1.0967	0.2731	0.3122	-7.183	0.5399	0.588
S100A16	ENSG00000188643	0.0132	6.8064	-0.1444	0.8852	0.895	-7.7733	0.59	0.5709
APOD	ENSG00000189058	-1.0558	5.6471	5.9292	0	0	9.3887	0.5105	0.6443
H1F0	ENSG00000189060	-0.3884	7.1589	6.5759	0	0	13.2301	0.5583	0.561
S100A14	ENSG00000189334	-0.2921	0	2.0923	0.0367	0.0474	-5.6013	0.521	0.5836
CXCL17	ENSG00000189377	0.5921	0	-2.6192	0.009	0.0126	-4.3658	0.5227	0.5124
MYBPC1	ENSG00000196091	-0.3257	0	1.197	0.2317	0.2669	-7.057	0.5448	0.642
HLA-DRB1	ENSG00000196126	0.113	7.9924	-1.3683	0.1716	0.205	-6.8491	0.5472	0.6117
S100A4	ENSG00000196154	0.3096	5.981	-4.0466	0.0001	0.0001	0.3128	0.5038	0.5558
TUBB	ENSG00000196230	0.6186	8.0254	-15.8566	0	0	100.603	0.5212	0.5019
XRCC2	ENSG00000196584	0.9223	0.5103	-12.9275	0	0	67.6304	0.5335	0.5576
S100A2	ENSG00000196754	1.1796	0	-6.7857	0	0	14.5521	0.5194	0.6145
SERPINA1	ENSG00000197249	-0.5597	4.0317	4.3314	0	0	1.4782	0.5845	0.5917
PSAP	ENSG00000197746	0.1176	9.0187	-2.8807	0.0041	0.0059	-3.6589	0.5228	0.5898
S100A10	ENSG00000197747	0.5967	6.7094	-8.3992	0	0	25.9168	0.5148	0.504
HIST1H2BK	ENSG00000197903	0.5302	6.0599	-5.879	0	0	9.1055	0.5094	0.5371
S100A6	ENSG00000197956	0.3767	8.1435	-4.1172	0	0.0001	0.5947	0.5193	0.5546
RPL12	ENSG00000197958	-0.1351	7.994	2.8096	0.0051	0.0073	-3.8589	0.5155	0.6333
RPS4X	ENSG00000198034	-0.3006	8.994	6.5985	0	0	13.3705	0.5207	0.6364
RPL23A	ENSG00000198242	-0.1062	7.2771	2.125	0.0339	0.0441	-5.5334	0.5152	0.5715
HLA-DRB5	ENSG00000198502	0.0418	6.1626	-0.3972	0.6913	0.7181	-7.7048	0.5549	0.6055
MT-ND6	ENSG00000198695	-0.2836	10.2356	3.8204	0.0001	0.0002	-0.5586	0.5509	0.5401
MT-CO2	ENSG00000198712	0.3173	12.3656	-5.4245	0	0	6.6423	0.5532	0.5095
MT-CYB	ENSG00000198727	0.025	11.4733	-0.4098	0.682	0.7101	-7.6998	0.5464	0.5148
MTCO3P12	ENSG00000198744	0.1011	1.4354	-0.88	0.3792	0.4218	-7.3969	0.5788	0.5053
RPL10A	ENSG00000198755	-0.1525	8.5738	3.8361	0.0001	0.0002	-0.4996	0.5135	0.5922
MT-ND2	ENSG00000198763	0.2349	11.3304	-3.6456	0.0003	0.0005	-1.1991	0.5012	0.5132
MT-ND5	ENSG00000198786	-0.1452	9.9846	2.0291	0.0428	0.0546	-5.7315	0.5261	0.5059
MT-CO1	ENSG00000198804	-0.0915	12.2951	1.6314	0.1032	0.1266	-6.4558	0.5696	0.5324
MT-ND3	ENSG00000198840	-0.0443	11.3793	0.6681	0.5043	0.5399	-7.5607	0.5168	0.5679
MT-ND4	ENSG00000198886	0.1968	12.1837	-3.3346	0.0009	0.0014	-2.2668	0.5216	0.5286
MT-ND1	ENSG00000198888	-0.0816	11.3768	1.2719	0.2038	0.2372	-6.976	0.5023	0.5957
MT-ATP6	ENSG00000198899	0.0463	11.7655	-0.7724	0.4401	0.4768	-7.4856	0.5332	0.5031
MT-CO3	ENSG00000198938	-0.0442	12.4552	0.7736	0.4394	0.4768	-7.4847	0.5823	0.5379
RF00100	ENSG00000202198	-0.1343	3.4737	1.0737	0.2833	0.3222	-7.2079	0.5103	0.6466
HLA-DRA	ENSG00000204287	0.0862	8.9189	-1.0577	0.2905	0.3288	-7.2249	0.5698	0.6034
HLA-C	ENSG00000204525	0.1797	8.4797	-2.6259	0.0088	0.0124	-4.353	0.5175	0.5127
C6orf15	ENSG00000204542	1.3645	0	-6.7807	0	0	14.4918	0.5027	0.5667
AARD	ENSG00000205002	0.5648	0	-3.3089	0.001	0.0015	-2.3497	0.5247	0.5537
KRT81	ENSG00000205426	1.9864	1.3434	-8.3487	0	0	25.5299	0.5085	0.5558
TMSB4X	ENSG00000205542	0.0681	9.2162	-1.2754	0.2026	0.2363	-6.9716	0.5285	0.5592
HLA-A	ENSG00000206503	0.4587	8.1287	-5.899	0	0	9.2179	0.5104	0.5232
MT-RNR2	ENSG00000210082	0.0666	11.8599	-0.9209	0.3574	0.3986	-7.3601	0.5787	0.5127
MT-TP	ENSG00000210196	0.2439	9.232	-3.6987	0.0002	0.0004	-1.0076	0.5808	0.6154
MT-RNR1	ENSG00000211459	0.2179	9.4133	-2.7464	0.0062	0.0087	-4.0327	0.5479	0.5439
IGKC	ENSG00000211592	0.993	7.5993	-5.1543	0	0	5.2654	0.5538	0.6764
IGKV4-1	ENSG00000211598	0.9936	5.4715	-4.7929	0	0	3.526	0.5686	0.6389
IGLV4-69	ENSG00000211637	0.942	0	-4.6183	0	0	2.7347	0.548	0.655
IGLV8-61	ENSG00000211638	0.5006	0	-2.1644	0.0308	0.0406	-5.4184	0.5233	0.6972
IGLV6-57	ENSG00000211640	1.1052	0	-5.3178	0	0	6.0945	0.607	0.6099
IGLV1-51	ENSG00000211644	0.679	4.545	-3.6042	0.0003	0.0005	-1.3465	0.5897	0.641
IGLV1-47	ENSG00000211648	1.0658	0	-5.1308	0	0	5.1503	0.5731	0.6392
IGLV1-44	ENSG00000211651	1.0692	0	-5.2815	0	0	5.9078	0.5723	0.6276
IGLV1-40	ENSG00000211653	0.8867	0	-4.5373	0	0	2.3698	0.5594	0.6423
IGLV1-36	ENSG00000211655	0.4911	0	-2.5217	0.0119	0.0164	-4.5784	0.5449	0.6745
IGLV3-27	ENSG00000211658	0.7596	0	-3.6899	0.0002	0.0004	-0.9993	0.5394	0.6021
IGLV3-25	ENSG00000211659	1.1779	0	-5.5861	0	0	7.4991	0.5534	0.5918
IGLV2-23	ENSG00000211660	0.8106	0	-4.0441	0.0001	0.0001	0.3038	0.5618	0.6342
IGLV3-21	ENSG00000211662	1.0568	0	-5.048	0	0	4.742	0.5828	0.6276
IGLV3-19	ENSG00000211663	0.8994	0	-4.2724	0	0	1.233	0.5631	0.6626
IGLV2-14	ENSG00000211666	0.8396	0	-4.1558	0	0.0001	0.7523	0.5653	0.6253
IGLV2-11	ENSG00000211668	0.7459	0	-3.8009	0.0002	0.0003	-0.6284	0.5469	0.6389
IGLV3-10	ENSG00000211669	0.7783	0	-3.6356	0.0003	0.0005	-1.2227	0.5015	0.6157
IGLV3-9	ENSG00000211670	0.4782	0	-2.3844	0.0174	0.0237	-4.9203	0.5549	0.6408
IGLV3-1	ENSG00000211673	1.1205	0	-5.3506	0	0	6.2622	0.5698	0.5902
IGLC2	ENSG00000211677	1.0541	6.6258	-5.6429	0	0	7.8034	0.5667	0.6647
IGLC3	ENSG00000211679	0.9237	0	-4.7188	0	0	3.1845	0.5432	0.6415
IGLC7	ENSG00000211685	0.3907	0	-1.8753	0.0612	0.0769	-5.993	0.5731	0.6481
IGHA2	ENSG00000211890	-0.5837	0	3.0094	0.0027	0.0039	-3.2837	0.5495	0.708
IGHG4	ENSG00000211892	0.2991	0	-1.6661	0.0961	0.1188	-6.3981	0.5623	0.5771
IGHG2	ENSG00000211893	0.9072	0	-5.4013	0	0	6.5219	0.5308	0.6395
IGHA1	ENSG00000211895	-0.0379	7.8725	0.2055	0.8373	0.8542	-7.7626	0.5771	0.6842
IGHG1	ENSG00000211896	1.7096	6.8314	-8.1844	0	0	24.2853	0.5739	0.5777
IGHG3	ENSG00000211897	1.387	0	-7.3716	0	0	18.438	0.5845	0.5897
IGHM	ENSG00000211899	1.0018	0	-4.8028	0	0	3.5726	0.5376	0.6354
IGHV1-2	ENSG00000211934	0.7366	0	-3.37	0.0008	0.0012	-2.1405	0.5946	0.6361
IGHV3-15	ENSG00000211943	0.4323	0	-2.1798	0.0296	0.0391	-5.4106	0.5694	0.677
IGHV1-18	ENSG00000211945	1.2728	0	-5.9389	0	0	9.4438	0.569	0.654
IGHV3-21	ENSG00000211947	1.0814	0	-5.1871	0	0	5.4319	0.5595	0.6367
IGHV3-23	ENSG00000211949	1.0331	0	-5.0572	0	0	4.7871	0.5759	0.6487
IGHV1-24	ENSG00000211950	0.7368	0	-3.6232	0.0003	0.0005	-1.2693	0.5562	0.6179
IGHV2-26	ENSG00000211951	0.6199	0	-2.9407	0.0034	0.0049	-3.4586	0.5316	0.5744
IGHV3-33	ENSG00000211955	0.9424	0	-4.6908	0	0	3.0624	0.5256	0.5881
IGHV4-39	ENSG00000211959	0.9976	0	-4.7947	0	0	3.5366	0.5386	0.6314
IGHV3-48	ENSG00000211964	0.9658	0	-4.7365	0	0	3.2752	0.5429	0.6246
IGHV3-49	ENSG00000211965	0.4709	0	-2.3106	0.0211	0.0284	-5.1133	0.5215	0.6535
IGHV5-51	ENSG00000211966	0.8671	0	-4.305	0	0	1.3703	0.553	0.6406
IGHV1-58	ENSG00000211968	0.4531	0	-2.2752	0.0232	0.031	-5.154	0.5063	0.6665
IGHV3-73	ENSG00000211976	0.6669	0	-3.153	0.0017	0.0025	-2.8337	0.5777	0.6145
MT-ND4L	ENSG00000212907	0.1744	10.3655	-2.3311	0.02	0.027	-5.0774	0.5228	0.5257
IGHV4-59	ENSG00000224373	1.0343	0	-5.0733	0	0	4.8673	0.5713	0.6572
MTND2P28	ENSG00000225630	0.1777	6.3937	-1.6174	0.1062	0.1299	-6.4784	0.5131	0.5574
IGHV3-72	ENSG00000225698	0.0942	0	-0.5126	0.6084	0.6393	-7.6398	0.5134	0.6792
MTND1P23	ENSG00000225972	0.2874	0.9367	-1.3585	0.1747	0.2076	-6.8624	0.5137	0.5897
U62317.1	ENSG00000226738	1.6009	0	-9.0837	0	0	31.2903	0.5642	0.5065
RPL41P1	ENSG00000227063	-0.3647	0	4.9215	0	0	4.1315	0.5436	0.5252
RPS28P7	ENSG00000227097	-0.114	7.081	0.6567	0.5116	0.5451	-7.5682	0.5266	0.5811
KLLN	ENSG00000227268	-0.3064	-1.7998	4.5007	0	0	2.2066	0.579	0.6268
MT-ATP8	ENSG00000228253	0.0962	10.6232	-1.2891	0.1978	0.2313	-6.954	0.5269	0.5127
RPS18	ENSG00000231500	0.05	9.546	-1.0053	0.3151	0.354	-7.2789	0.5027	0.6098
CYP2T1P	ENSG00000233622	-1.6902	2.4608	8.1223	0	0	23.8209	0.5029	0.5919
RPS28	ENSG00000233927	-0.0516	6.4967	0.8391	0.4017	0.4425	-7.4319	0.5219	0.5707
HLA-B	ENSG00000234745	0.3929	8.8021	-5.1381	0	0	5.1848	0.547	0.521
MTCO1P12	ENSG00000237973	0.0808	5.4596	-0.8408	0.4007	0.4425	-7.4305	0.5553	0.5536
IGKV1-6	ENSG00000239855	0.4031	0	-2.0876	0.0372	0.0478	-5.6033	0.5571	0.6906
IGKV3-20	ENSG00000239951	1.0158	0	-5.3042	0	0	6.022	0.57	0.6335
IGKV1-17	ENSG00000240382	0.4298	0	-2.1541	0.0316	0.0415	-5.4638	0.5362	0.6409
IGKV1-16	ENSG00000240864	0.4383	0	-2.2622	0.024	0.0318	-5.2232	0.531	0.6452
IGKV3-11	ENSG00000241351	1.0299	0	-5.2662	0	0	5.8289	0.5422	0.6209
PEG10	ENSG00000242265	0.6459	3.0522	-2.972	0.0031	0.0044	-3.3947	0.5822	0.5851
IGHJ3	ENSG00000242887	0.4846	0	-2.8697	0.0042	0.0061	-3.6415	0.5737	0.6108
IGKV2D-29	ENSG00000243264	0.6222	0	-3.0472	0.0024	0.0035	-3.1448	0.5341	0.6395
IGKV1-5	ENSG00000243466	1.0656	0	-5.3836	0	0	6.4313	0.5783	0.646
AC093001.1	ENSG00000244468	-0.8722	0	2.6411	0.0084	0.0119	-4.2846	0.5465	0.5516
AC005150.1	ENSG00000248431	-0.3306	0	0.8505	0.3958	0.4382	-6.9069	0.5002	0.5384
MTATP6P1	ENSG00000248527	0.1066	8.6292	-1.4339	0.152	0.183	-6.7575	0.5558	0.5209
IGKV2D-40	ENSG00000251039	0.4983	0	-2.3862	0.0173	0.0236	-4.8771	0.5511	0.6725
GLYATL1P4	ENSG00000254399	-0.1375	0	0.8199	0.4126	0.4524	-7.3715	0.5117	0.5544
CYP2A6	ENSG00000255974	-2.0019	0	8.0932	0	0	23.5519	0.6072	0.5016
RPL41P5	ENSG00000256393	-0.3775	6.1247	5.2708	0	0	5.8509	0.5306	0.5727
MSMB	ENSG00000263639	-0.7374	0	3.5095	0.0005	0.0007	-1.6586	0.5044	0.5513
AC099850.3	ENSG00000265415	1.6575	0	-17.2227	0	0	117.125	0.5066	0.5759
TXNIP	ENSG00000265972	-0.7599	7.0284	11.5791	0	0	53.8732	0.5301	0.5219
SCGB1B2P	ENSG00000268751	-0.2428	0	1.8565	0.0638	0.0799	-6.0643	0.5735	0.5084
IGHV3-30	ENSG00000270550	0.7825	0	-3.9436	0.0001	0.0002	-0.0858	0.546	0.5874
CD24	ENSG00000272398	0.778	7.8982	-6.6025	0	0	13.3957	0.5715	0.5744
RN7SL2	ENSG00000274012	0.0125	5.4805	-0.1144	0.9089	0.9129	-7.7772	0.5149	0.5206
PSMB3	ENSG00000277791	0.2268	6.47	-3.8691	0.0001	0.0002	-0.3751	0.518	0.5309
IGHV1-69D	ENSG00000280411	1.1607	0	-5.5711	0	0	7.4203	0.5976	0.6136
FP671120.4	ENSG00000281383	0.2173	0	-2.1392	0.0327	0.0428	-5.5013	0.5149	0.5482
