# Supplementary material for: Comparative Analysis of Gene Correlation Networks of Breast Cancer Patients Based on Mutations in TP53
Source: Biomolecules. 2022 Jul 13;12(7):979. doi: 10.3390/biom12070979 (PMC9313229; doi:10.3390/biom12070979)
Supplement: Supplementary file 1 [file biomolecules-12-00979-s001.zip › Supplementary Materials S3.csv]

Category	ID	Term	Genes	adj_pval
GOTERM_CC_DIRECT	GO:0005615	extracellular space	IGHG1, FMOD, IGHG3, S100A8, IL6ST, MMP9, S100A9, MMP7, CXCL9, IGHM, CXCL10, KRT81, AZGP1, APOD, SERPINA6, IGHV3-23, PIP, TFF3, CEACAM6, TFF1, PLAT, STC2, CHI3L1, IGF2, LCN2, SCGB2A1, CXCL14, CXCL13, SCGB1D2, CST5, SLPI, IGKV3-20, AREG, IGLC2, CPB1, AGR2, WFDC2, CSN3, IGFBP4	2.71E-17
GOTERM_CC_DIRECT	GO:0005576	extracellular region	FDCSP, IGHG1, CGA, FMOD, IGHG3, S100A8, IGLV1-44, S100A7, IL6ST, MMP9, IGLV1-47, S100A9, MMP7, CXCL9, TRH, CXCL10, AZGP1, APOD, IGHV3-23, IGLV6-57, PIP, TFF3, PLAT, STC2, IGF2, IGLV3-1, LCN2, IGKV1-5, CXCL14, CXCL13, CLEC3A, CST5, IGKV3-20, IGLV3-25, IGLC2, IGHV4-59, WFDC2, CSN3, IGFBP4, IGLV3-21	7.32E-16
GOTERM_MF_DIRECT	GO:0003823	antigen binding	IGHG1, IGHG3, IGLV1-44, IGLV1-47, IGHM, IGLV3-1, AZGP1, IGKV1-5, IGLV6-57, IGHV3-23, IGKV3-20, IGLV3-25, IGLC2, IGHV4-59, IGLV3-21	4.80E-14
GOTERM_BP_DIRECT	GO:0006958	complement activation, classical pathway	IGHG1, IGHG3, IGLV1-44, IGLV1-47, IGHM, IGLV3-1, IGKV1-5, IGLV6-57, IGHV3-23, IGKV3-20, IGLV3-25, IGLC2, IGHV4-59, IGLV3-21	4.11E-12
GOTERM_BP_DIRECT	GO:0006956	complement activation	IGHG1, IGKV1-5, IGHG3, IGLV1-44, IGLV1-47, IGHV3-23, IGLV6-57, IGKV3-20, IGLV3-25, IGLC2, IGHV4-59, IGLV3-21, IGLV3-1	1.30E-11
GOTERM_BP_DIRECT	GO:0038096	Fc-gamma receptor signaling pathway involved in phagocytosis	IGHG1, IGKV1-5, IGHG3, IGLV1-44, IGLV1-47, IGHV3-23, IGLV6-57, IGKV3-20, IGLV3-25, IGLC2, IGHV4-59, IGLV3-21, IGLV3-1	8.82E-10
GOTERM_MF_DIRECT	GO:0004252	serine-type endopeptidase activity	PLAT, IGHG1, IGHG3, IGLV1-44, MMP9, IGLV1-47, MMP7, IGLV3-1, IGKV1-5, IGLV6-57, IGHV3-23, IGKV3-20, IGLV3-25, IGLC2, IGHV4-59, IGLV3-21	5.81E-10
GOTERM_CC_DIRECT	GO:0070062	extracellular exosome	IGHG1, LDHB, IGHG3, TSPAN1, S100A8, S100A7, IL6ST, MMP9, IGLV1-47, S100A9, MMP7, IGHM, SLC7A5, AZGP1, APOD, SERPINA6, IGHV3-23, IGLV6-57, PIP, TFF3, RHOB, CALML5, PLAT, CHI3L1, IGF2, LCN2, GLUL, IGKV1-5, BTG2, KRT16, PI3, CLIC6, CST5, PHGDH, GFRA1, SLPI, IGKV3-20, IGLV3-25, IGLC2, IGHV4-59, WFDC2, IGLV3-21	2.00E-09
GOTERM_BP_DIRECT	GO:0006508	proteolysis	PLAT, IGHG1, IGHG3, IGLV1-44, MMP9, IGLV1-47, MMP7, IGLV3-1, IGKV1-5, IGLV6-57, IGHV3-23, PIP, IGKV3-20, IGLV3-25, CPB1, IGLC2, IGHV4-59, WFDC2, IGLV3-21	2.66E-08
GOTERM_BP_DIRECT	GO:0038095	Fc-epsilon receptor signaling pathway	FOS, IGKV1-5, IGLV1-44, IGLV6-57, IGLV1-47, IGHV3-23, IGKV3-20, IGLV3-25, IGLC2, IGHV4-59, IGLV3-21, IGLV3-1	4.25E-07
GOTERM_BP_DIRECT	GO:0006955	immune response	IGLV1-44, IGLV1-47, CXCL9, IGLV3-1, CXCL10, IGF1R, IGKV1-5, CXCL14, CXCL13, IGLV6-57, IGHV3-23, SLPI, IGKV3-20, IGLV3-25, IGHV4-59, IGLV3-21	8.19E-07
GOTERM_BP_DIRECT	GO:0050776	regulation of immune response	IGKV1-5, IGLV1-44, IGLV6-57, IGLV1-47, IGHV3-23, IGKV3-20, IGLV3-25, IGLC2, IGHV4-59, IGLV3-21, IGLV3-1	4.09E-06
GOTERM_BP_DIRECT	GO:0006898	receptor-mediated endocytosis	IGKV1-5, IGLV1-44, IGLV6-57, IGLV1-47, IGHV3-23, IGKV3-20, IGLV3-25, IGLC2, IGHV4-59, IGLV3-21, IGLV3-1	5.43E-06
GOTERM_CC_DIRECT	GO:0072562	blood microparticle	IGHG1, IGHG3, IGKV1-5, IGLV1-47, IGHV3-23, IGKV3-20, IGLV3-25, IGLC2, IGHM, IGLV3-21	2.17E-06
GOTERM_MF_DIRECT	GO:0034987	immunoglobulin receptor binding	IGHG1, IGHG3, IGHV3-23, IGLC2, IGHM	7.43E-04
GOTERM_BP_DIRECT	GO:0050871	positive regulation of B cell activation	IGHG1, IGHG3, IGHV3-23, IGLC2, IGHM	8.23E-04
GOTERM_BP_DIRECT	GO:0006910	phagocytosis, recognition	IGHG1, IGHG3, IGHV3-23, IGLC2, IGHM	0.001006205
GOTERM_BP_DIRECT	GO:0045087	innate immune response	IGHG1, LCN2, IGHG3, S100A8, S100A7, KRT16, GATA3, IGHV3-23, S100A9, SLPI, IGLC2, IGHM	0.001254379
GOTERM_BP_DIRECT	GO:0006911	phagocytosis, engulfment	IGHG1, IGHG3, IGHV3-23, IGLC2, IGHM	0.002081925
GOTERM_BP_DIRECT	GO:0007267	cell-cell signaling	CGA, CXCL14, CXCL13, S100A9, CXCL9, CEACAM6, AREG, TRH, CXCL10	0.003652138
GOTERM_CC_DIRECT	GO:0009897	external side of plasma membrane	IGHG1, IGHG3, IL6ST, IGHV3-23, CXCL9, IGLC2, IGHM, CXCL10	0.002264998
GOTERM_CC_DIRECT	GO:0042571	immunoglobulin complex, circulating	IGHG1, IGHG3, IGHV3-23, IGLC2	0.001959062
GOTERM_BP_DIRECT	GO:0042742	defense response to bacterium	IGHG1, IGHG3, S100A8, CXCL13, IGHV3-23, S100A9, IGLC2	0.00653147
GOTERM_BP_DIRECT	GO:0050853	B cell receptor signaling pathway	IGHG1, IGHG3, IGHV3-23, IGLC2, IGHM	0.009267264
GOTERM_BP_DIRECT	GO:0032496	response to lipopolysaccharide	FOS, S100A8, S100A7, CXCL13, CXCL9, SLPI, CXCL10	0.011132173
GOTERM_MF_DIRECT	GO:0048248	CXCR3 chemokine receptor binding	CXCL13, CXCL9, CXCL10	0.014911564
GOTERM_BP_DIRECT	GO:0006954	inflammatory response	FOS, S100A8, CXCL13, KRT16, S100A9, CHI3L1, CXCL9, IGFBP4, CXCL10	0.040385158
GOTERM_MF_DIRECT	GO:0050786	RAGE receptor binding	S100A8, S100A7, S100A9	0.062727107
GOTERM_BP_DIRECT	GO:0043434	response to peptide hormone	BTG2, STC2, TFF1, AREG	0.062910367
GOTERM_MF_DIRECT	GO:0008009	chemokine activity	CXCL14, CXCL13, CXCL9, CXCL10	0.078269311
GOTERM_BP_DIRECT	GO:0060749	mammary gland alveolus development	CCND1, ESR1, AREG	0.124500465
GOTERM_BP_DIRECT	GO:0051412	response to corticosterone	FOS, CCND1, TRH	0.132061816
GOTERM_BP_DIRECT	GO:0042493	response to drug	LCN2, FOS, CCND1, APOD, GATA3, RAD54L, RAD51	0.179966504
GOTERM_MF_DIRECT	GO:0008201	heparin binding	FMOD, CXCL13, C6ORF15, MMP7, CXCL10	0.27959036
GOTERM_BP_DIRECT	GO:0070488	neutrophil aggregation	S100A8, S100A9	0.282850525
GOTERM_CC_DIRECT	GO:0005578	proteinaceous extracellular matrix	FMOD, MMP9, PI3, CHI3L1, MMP7, TFF3	0.160985851
GOTERM_BP_DIRECT	GO:0008284	positive regulation of cell proliferation	IGF1R, CGA, ZNF703, IL6ST, CEACAM6, IGF2, AREG, CXCL10	0.323581778
GOTERM_CC_DIRECT	GO:0005886	plasma membrane	TSPAN1, S100A8, IGLV1-44, IL6ST, IGLV1-47, S100A9, IGHM, TRH, SLC7A5, AZGP1, IGF1R, LY6D, IGHV3-23, IGLV6-57, CEACAM6, RHOB, SLC39A6, CA12, ESR1, IGF2, NPY1R, IGLV3-1, IGKV1-5, CLIC6, GFRA1, IGKV3-20, IGLV3-25, SUSD3, IGLC2, SLC40A1, IGHV4-59, IGLV3-21	0.152884181
GOTERM_MF_DIRECT	GO:0004867	serine-type endopeptidase inhibitor activity	SERPINA6, PI3, SLPI, WFDC2	0.336335846
GOTERM_BP_DIRECT	GO:0032602	chemokine production	S100A8, S100A9	0.366921758
GOTERM_BP_DIRECT	GO:0009409	response to cold	FOS, TRH, CXCL10	0.356415817
GOTERM_MF_DIRECT	GO:0004866	endopeptidase inhibitor activity	PI3, SLPI, WFDC2	0.372460693
GOTERM_BP_DIRECT	GO:0045471	response to ethanol	CCND1, S100A8, GATA3, TRH	0.397796852
GOTERM_BP_DIRECT	GO:0001895	retina homeostasis	AZGP1, IGHG3, PIP	0.392935774
GOTERM_MF_DIRECT	GO:0035662	Toll-like receptor 4 binding	S100A8, S100A9	0.369920756
GOTERM_BP_DIRECT	GO:0002793	positive regulation of peptide secretion	S100A8, S100A9	0.406955364
GOTERM_BP_DIRECT	GO:0032119	sequestering of zinc ion	S100A8, S100A9	0.406955364
GOTERM_BP_DIRECT	GO:0060750	epithelial cell proliferation involved in mammary gland duct elongation	ESR1, AREG	0.406955364
GOTERM_BP_DIRECT	GO:0007165	signal transduction	IGF1R, CGA, CRABP1, CXCL14, GATA3, S100A9, CXCL9, ESR1, CEACAM6, CALML5, TRH, IGFBP4, CXCL10	0.411272252
GOTERM_MF_DIRECT	GO:0050544	arachidonic acid binding	S100A8, S100A9	0.408393144
GOTERM_BP_DIRECT	GO:0010951	negative regulation of endopeptidase activity	SERPINA6, PI3, SLPI, WFDC2	0.471548354
GOTERM_BP_DIRECT	GO:0030816	positive regulation of cAMP metabolic process	CXCL9, CXCL10	0.507335081
GOTERM_MF_DIRECT	GO:0036094	small molecule binding	LCN2, APOD	0.490170193
GOTERM_BP_DIRECT	GO:0001501	skeletal system development	CLEC3A, MMP9, IGF2, IGFBP4	0.56095826
GOTERM_BP_DIRECT	GO:0033601	positive regulation of mammary gland epithelial cell proliferation	CCND1, ZNF703	0.588006693
GOTERM_CC_DIRECT	GO:0043209	myelin sheath	LDHB, GLUL, EEF1A2, PHGDH	0.384260399
GOTERM_MF_DIRECT	GO:0002162	dystroglycan binding	AGR3, AGR2	0.5504813
GOTERM_MF_DIRECT	GO:0001948	glycoprotein binding	PLAT, AZGP1, PIP	0.524812229
GOTERM_BP_DIRECT	GO:0002544	chronic inflammatory response	S100A8, CXCL13	0.620264259
GOTERM_BP_DIRECT	GO:0060326	cell chemotaxis	CXCL14, CXCL9, CXCL10	0.615375552
GOTERM_BP_DIRECT	GO:0043627	response to estrogen	CCND1, GATA3, ESR1	0.615375552
GOTERM_BP_DIRECT	GO:0006006	glucose metabolic process	APOD, IGF2, NPY1R	0.625457169
GOTERM_BP_DIRECT	GO:0006952	defense response	GATA3, CXCL9, TFF3	0.625457169
GOTERM_BP_DIRECT	GO:0010820	positive regulation of T cell chemotaxis	S100A7, CXCL13	0.627926344
GOTERM_CC_DIRECT	GO:0030141	secretory granule	PLAT, TFF3, TRH	0.428006694
GOTERM_BP_DIRECT	GO:0070098	chemokine-mediated signaling pathway	CXCL13, CXCL9, CXCL10	0.644546393
GOTERM_BP_DIRECT	GO:0002523	leukocyte migration involved in inflammatory response	S100A8, S100A9	0.643631458
GOTERM_BP_DIRECT	GO:0007568	aging	FOS, APOD, KRT16, MMP7	0.650147056
GOTERM_CC_DIRECT	GO:0009986	cell surface	PLAT, LY6D, MMP7, SLC39A6, AREG, SLITRK6, IGHM	0.42781308
GOTERM_BP_DIRECT	GO:0007166	cell surface receptor signaling pathway	TSPAN1, CXCL13, GFRA1, NPY1R, CXCL10	0.648474299
GOTERM_MF_DIRECT	GO:0031994	insulin-like growth factor I binding	IGF1R, IGFBP4	0.603087315
GOTERM_BP_DIRECT	GO:0043950	positive regulation of cAMP-mediated signaling	CXCL9, CXCL10	0.648385876
GOTERM_CC_DIRECT	GO:0031012	extracellular matrix	PLAT, FMOD, S100A9, MMP7, SLPI	0.429112188
GOTERM_BP_DIRECT	GO:0042060	wound healing	S100A8, TFF3, TFF1	0.678546757
GOTERM_BP_DIRECT	GO:0007399	nervous system development	FOS, BEX1, GFRA1, FABP7, SLC7A5	0.673689845
GOTERM_BP_DIRECT	GO:0060065	uterus development	GATA3, ESR1	0.679603978
GOTERM_BP_DIRECT	GO:0051897	positive regulation of protein kinase B signaling	GATA3, CHI3L1, IGF2	0.685953652
GOTERM_BP_DIRECT	GO:0008544	epidermis development	S100A7, KRT16, CALML5	0.685852849
GOTERM_BP_DIRECT	GO:0030335	positive regulation of cell migration	IGF1R, CGA, ZNF703, CEACAM6	0.680983069
GOTERM_BP_DIRECT	GO:0090026	positive regulation of monocyte chemotaxis	S100A7, CXCL10	0.697199464
GOTERM_BP_DIRECT	GO:0014002	astrocyte development	S100A8, S100A9	0.697199464
GOTERM_BP_DIRECT	GO:0032355	response to estradiol	CCND1, ESR1, AREG	0.707561697
GOTERM_MF_DIRECT	GO:0005179	hormone activity	CGA, STC2, IGF2	0.718894596
GOTERM_BP_DIRECT	GO:0002690	positive regulation of leukocyte chemotaxis	CXCL9, CXCL10	0.72511069
GOTERM_BP_DIRECT	GO:0033280	response to vitamin D	STC2, CXCL10	0.72511069
GOTERM_BP_DIRECT	GO:0010039	response to iron ion	CCND1, TFF1	0.72511069
GOTERM_MF_DIRECT	GO:0005215	transporter activity	LCN2, APOD, CRABP1, FABP7	0.712265214
GOTERM_BP_DIRECT	GO:0051493	regulation of cytoskeleton organization	S100A8, S100A9	0.73735616
