# Supplementary material for: Comparative Analysis of Gene Correlation Networks of Breast Cancer Patients Based on Mutations in TP53
Source: Biomolecules. 2022 Jul 13;12(7):979. doi: 10.3390/biom12070979 (PMC9313229; doi:10.3390/biom12070979)
Supplement: Supplementary file 1 [file biomolecules-12-00979-s001.zip › Supplementary Materials S4.csv]

gene1	gene2
ABCB1	ABCG2
ABCB1	AHR
ABCB1	AKIP1
ABCB1	AKT1
ABCB1	ALDH1A1
ABCB1	ANKRD30A
ABCB1	ANXA1
ABCB1	ARFGEF3
ABCB1	ARID4B
ABCB1	BAG1
ABCB1	BAK1
ABCB1	BARD1
ABCB1	BCAR3
ABCB1	BCAS1
ABCB1	BCAS3
ABCB1	BCYRN1
ABCB1	BEX2
ABCB1	BMP1
ABCB1	BMPR1A
ABCB1	BRAF
ABCB1	BSG
ABCB1	CA9
ABCB1	CASC2
ABCB1	CASP3
ABCB1	CASP8
ABCB1	CASP9
ABCB1	CCND1
ABCB1	CCNE1
ABCB1	CD44
ABCB1	CDC25B
ABCB1	CDH1
ABCB1	CDH2
ABCB1	CDH3
ABCB1	CDK2
ABCB1	CDK6
ABCB1	CDKN1B
ABCB1	CEP85L
ABCB1	CHEK2
ABCB1	CLDN7
ABCB1	CLDND1
ABCB1	CRNDE
ABCB1	CTCF
ABCB1	CTSD
ABCB1	CXCL12
ABCB1	CYCS
ABCB1	CYP19A1
ABCB1	CYP1A1
ABCB1	DIRC3
ABCB1	DNMT3B
ABCB1	DRAIC
ABCB1	E2F3
ABCB1	ECM1
ABCB1	EGF
ABCB1	EGOT
ABCB1	EPCAM
ABCB1	ERBB2
ABCB1	ERBB3
ABCB1	ERBB4
ABCB1	ERVH48-1
ABCB1	ESR1
ABCB1	ESR2
ABCB1	ESRRA
ABCB1	ETV4
ABCB1	FASN
ABCB1	FBLN1
ABCB1	FBXW7
ABCB1	FGF1
ABCB1	FGFR2
ABCB1	FHIT
ABCB1	FOS
ABCB1	FOSL1
ABCB1	FOXA1
ABCB1	FOXC1
ABCB1	FOXO1
ABCB1	GADD45A
ABCB1	GAS5
ABCB1	GATA3
ABCB1	GLI1
ABCB1	GNRH1
ABCB1	GNRH2
ABCB1	GPX1
ABCB1	GRB2
ABCB1	GRB7
ABCB1	GREB1
ABCB1	GSK3B
ABCB1	HBEGF
ABCB1	HDAC1
ABCB1	HERC2
ABCB1	HFE
ABCB1	HGF
ABCB1	HOXA11-AS
ABCB1	HOXA-AS2
ABCB1	IDH1
ABCB1	IGF1
ABCB1	IGF1R
ABCB1	IGF2
ABCB1	IGF2R
ABCB1	IL2
ABCB1	IL6
ABCB1	ING1
ABCB1	ITGB1
ABCB1	ITGB3BP
ABCB1	JUN
ABCB1	KCNK15-AS1
ABCB1	KDM5B
ABCB1	KIAA0100
ABCB1	KIT
ABCB1	KLF3-AS1
ABCB1	KLK10
ABCB1	KLLN
ABCB1	KRT14
ABCB1	KRT18
ABCB1	KRT19
ABCB1	KRT5
ABCB1	KRT8
ABCB1	LASP1
ABCB1	LINC00472
ABCB1	LINC00511
ABCB1	LINC00598
ABCB1	LINC00636
ABCB1	LINC00993
ABCB1	LINC01016
ABCB1	LINC01116
ABCB1	LSINCT5
ABCB1	MAGED2
ABCB1	MALAT1
ABCB1	MAPK10
ABCB1	MAPK12
ABCB1	MAPK14
ABCB1	MAPK8
ABCB1	MCM2
ABCB1	MDM2
ABCB1	MEG3
ABCB1	MMP17
ABCB1	MMP9
ABCB1	MSH6
ABCB1	MSR1
ABCB1	MST1R
ABCB1	MTA1
ABCB1	MTOR
ABCB1	MUC1
ABCB1	MUCL1
ABCB1	NAT2
ABCB1	NBAT1
ABCB1	NCOA1
ABCB1	NF1
ABCB1	NME1
ABCB1	NOTCH1
ABCB1	NOTCH4
ABCB1	NQO2
ABCB1	NR3C1
ABCB1	NRG1
ABCB1	NTRK3
ABCB1	ODC1
ABCB1	PAK1
ABCB1	PALB2
ABCB1	PARP1
ABCB1	PBOV1
ABCB1	PELP1
ABCB1	PGR
ABCB1	PHB
ABCB1	PIK3CA
ABCB1	PINK1-AS
ABCB1	PIP
ABCB1	PLAU
ABCB1	PLK1
ABCB1	PPM1D
ABCB1	PRKACA
ABCB1	PRLR
ABCB1	PTEN
ABCB1	PTENP1
ABCB1	PTGS2
ABCB1	PTHLH
ABCB1	PTK2
ABCB1	PTK6
ABCB1	PTN
ABCB1	PTPRG-AS1
ABCB1	PVT1
ABCB1	RAD51C
ABCB1	RARA
ABCB1	RARB
ABCB1	RASSF1
ABCB1	RASSF1-AS1
ABCB1	RBBP8
ABCB1	RHOA
ABCB1	RMST
ABCB1	RRAS2
ABCB1	SCGB2A2
ABCB1	SERPINB5
ABCB1	SERPINE1
ABCB1	SGK3
ABCB1	SHC1
ABCB1	SLC22A18
ABCB1	SLC9A3R1
ABCB1	SMAD4
ABCB1	SNHG16
ABCB1	SOX2-OT
ABCB1	SPRY4-IT1
ABCB1	SRC
ABCB1	ST8SIA6-AS1
ABCB1	STAT3
ABCB1	STMN1
ABCB1	STS
ABCB1	SUSD2
ABCB1	TFAP2C
ABCB1	TGFA
ABCB1	TGFBR2
ABCB1	TIMP2
ABCB1	TIMP4
ABCB1	TNF
ABCB1	TNFSF10
ABCB1	TOX3
ABCB1	TPD52L2
ABCB1	TUG1
ABCB1	TYMP
ABCB1	TYMS
ABCB1	VEGFA
ABCB1	VEGFC
ABCB1	WNT10B
ABCB1	WNT5A
ABCB1	WWOX
ABCB1	XBP1
ABCB1	XIST
ABCB1	XRCC2
ABCB1	YBX1
ABCB1	ZFAS1
ABCB1	ZNF667-AS1
ABCB1	ZNF703
ABCC1	ABCC11
ABCC1	AKAP13
ABCC1	AKIP1
ABCC1	AKT1
ABCC1	AKT2
ABCC1	AMPH
ABCC1	ANKRD30A
ABCC1	ANXA1
ABCC1	APC
ABCC1	ARFGEF3
ABCC1	AXL
ABCC1	BAG1
ABCC1	BCAR1
ABCC1	BECN1
ABCC1	BEX2
ABCC1	BMP1
ABCC1	BMP6
ABCC1	CASC22
ABCC1	CASP3
ABCC1	CAV1
ABCC1	CCNB1
ABCC1	CCND1
ABCC1	CCND2
ABCC1	CCNE1
ABCC1	CCNH
ABCC1	CDC25B
ABCC1	CDC27
ABCC1	CDC42
ABCC1	CDH1
ABCC1	CDH3
ABCC1	CDKN1A
ABCC1	CLDN7
ABCC1	CRNDE
ABCC1	CSF3
ABCC1	CTCF
ABCC1	CTSD
ABCC1	CTTN
ABCC1	CYCS
ABCC1	CYP17A1
ABCC1	CYP19A1
ABCC1	DANCR
ABCC1	DDR1
ABCC1	DIRC3
ABCC1	DRAIC
ABCC1	E2F3
ABCC1	ECM1
ABCC1	EFNA3
ABCC1	EGF
ABCC1	EPCAM
ABCC1	ERBB2
ABCC1	ERBB3
ABCC1	ERBB4
ABCC1	EREG
ABCC1	ESR1
ABCC1	ETV4
ABCC1	FBLN1
ABCC1	FGF1
ABCC1	FGF14-AS2
ABCC1	FGF2
ABCC1	FGF8
ABCC1	FGFR1
ABCC1	FGFR2
ABCC1	FHIT
ABCC1	FLT1
ABCC1	FOSL1
ABCC1	FOXA1
ABCC1	FOXC1
ABCC1	FOXCUT
ABCC1	GADD45A
ABCC1	GAS5
ABCC1	GATA3
ABCC1	GPER1
ABCC1	GPX1
ABCC1	GRB2
ABCC1	GRB7
ABCC1	GRN
ABCC1	GSN
ABCC1	H19
ABCC1	HDAC1
ABCC1	HDAC4
ABCC1	HERC2
ABCC1	HIF1A
ABCC1	HOXA11-AS
ABCC1	HOXA-AS2
ABCC1	HPR
ABCC1	IGF1
ABCC1	IGF2R
ABCC1	IGFBP5
ABCC1	IGKV1-5
ABCC1	IL6
ABCC1	IRS1
ABCC1	ITGB1
ABCC1	ITGB3BP
ABCC1	KCNK15-AS1
ABCC1	KDR
ABCC1	KIAA0100
ABCC1	KIT
ABCC1	KLK10
ABCC1	KRAS
ABCC1	KRT14
ABCC1	KRT18
ABCC1	KRT19
ABCC1	KRT5
ABCC1	KRT8
ABCC1	LASP1
ABCC1	LINC00160
ABCC1	LINC00598
ABCC1	LINC00993
ABCC1	LINC01089
ABCC1	LINC01405
ABCC1	MAGED2
ABCC1	MAGI2-AS3
ABCC1	MALAT1
ABCC1	MAPK14
ABCC1	MAPK9
ABCC1	MCM2
ABCC1	MIR2052HG
ABCC1	MIR663A
ABCC1	MMP14
ABCC1	MMP2
ABCC1	MSH2
ABCC1	MSH6
ABCC1	MSR1
ABCC1	MST1R
ABCC1	MUC1
ABCC1	MUCL1
ABCC1	NOTCH1
ABCC1	NOTCH4
ABCC1	NQO1
ABCC1	NRG1
ABCC1	NRP1
ABCC1	PAK1
ABCC1	PDGFRB
ABCC1	PGR
ABCC1	PIK3CA
ABCC1	PIP
ABCC1	PLAUR
ABCC1	PRKACA
ABCC1	PTEN
ABCC1	PTENP1
ABCC1	PTK6
ABCC1	PTN
ABCC1	RAD51C
ABCC1	RARA
ABCC1	RARB
ABCC1	RB1CC1
ABCC1	RBBP8
ABCC1	RHOA
ABCC1	RHOBTB2
ABCC1	RMST
ABCC1	ROBO1
ABCC1	RRAS2
ABCC1	S100A4
ABCC1	SCGB2A2
ABCC1	SERPINB5
ABCC1	SERPINE1
ABCC1	SFN
ABCC1	SGK3
ABCC1	SHBG
ABCC1	SHC1
ABCC1	SLC9A3R1
ABCC1	SMAD2
ABCC1	SMAD7
ABCC1	SNCG
ABCC1	SNHG16
ABCC1	SPRY4-IT1
ABCC1	SRA1
ABCC1	ST14
ABCC1	ST18
ABCC1	STAT3
ABCC1	STS
ABCC1	STXBP5-AS1
ABCC1	TACC1
ABCC1	TEK
ABCC1	TFAP2C
ABCC1	TGFA
ABCC1	TGFB1
ABCC1	TGFBR1
ABCC1	TGFBR2
ABCC1	TIMP1
ABCC1	TIMP4
ABCC1	TNF
ABCC1	TNFSF10
ABCC1	TOX3
ABCC1	TPD52L2
ABCC1	TRIM25
ABCC1	TWIST1
ABCC1	TYMP
ABCC1	VEGFA
ABCC1	XBP1
ABCC1	XIST
ABCC1	YBX1
ABCC1	ZFAS1
ABCC11	ADARB2-AS1
ABCC11	AHR
ABCC11	AMPH
ABCC11	ANKRD30A
ABCC11	ANXA1
ABCC11	APC
ABCC11	APOD
ABCC11	AR
ABCC11	ARFGEF3
ABCC11	ARID4B
ABCC11	ATM
ABCC11	ATR
ABCC11	AXIN2
ABCC11	AXL
ABCC11	BARD1
ABCC11	BCAR3
ABCC11	BCAS1
ABCC11	BCAS3
ABCC11	BEX2
ABCC11	BIRC5
ABCC11	BMP1
ABCC11	BMP6
ABCC11	BRAF
ABCC11	BRIP1
ABCC11	BSG
ABCC11	CASC2
ABCC11	CASP3
ABCC11	CASP9
ABCC11	CAV1
ABCC11	CCNB1
ABCC11	CCNB2
ABCC11	CCNH
ABCC11	CDC27
ABCC11	CDC42
ABCC11	CDH1
ABCC11	CDH3
ABCC11	CDK1
ABCC11	CDK2
ABCC11	CDK7
ABCC11	CDKN1A
ABCC11	CDKN2B-AS1
ABCC11	CHEK2
ABCC11	CLCA2
ABCC11	CLDN7
ABCC11	CRNDE
ABCC11	CSF3
ABCC11	CSN2
ABCC11	CTCF
ABCC11	CTNNB1
ABCC11	CTSD
ABCC11	CYCS
ABCC11	CYP19A1
ABCC11	DANCR
ABCC11	DDR1
ABCC11	DIRC3
ABCC11	DNMT3B
ABCC11	DRAIC
ABCC11	E2F3
ABCC11	ECM1
ABCC11	EFNA3
ABCC11	EGF
ABCC11	EGOT
ABCC11	EPCAM
ABCC11	ERBB2
ABCC11	ERBB3
ABCC11	ERBB4
ABCC11	ERVH48-1
ABCC11	ESR1
ABCC11	ETV4
ABCC11	EZH2
ABCC11	FGF1
ABCC11	FGF14-AS2
ABCC11	FGF2
ABCC11	FGFR2
ABCC11	FHIT
ABCC11	FLT1
ABCC11	FOSL1
ABCC11	FOXA1
ABCC11	GADD45A
ABCC11	GAS5
ABCC11	GATA3
ABCC11	GLI1
ABCC11	GNAS
ABCC11	GNRH1
ABCC11	GPER1
ABCC11	GPX1
ABCC11	GRB7
ABCC11	GREB1
ABCC11	GSN
ABCC11	H19
ABCC11	HBEGF
ABCC11	HDAC1
ABCC11	HDAC4
ABCC11	HEATR6
ABCC11	HFE
ABCC11	HIF1A
ABCC11	HOTAIR
ABCC11	HOXA11-AS
ABCC11	HOXA-AS2
ABCC11	HSPB1
ABCC11	IDH1
ABCC11	IGF1R
ABCC11	IGF2
ABCC11	IGF2R
ABCC11	IGFBP3
ABCC11	IGFBP5
ABCC11	IGKV1-5
ABCC11	IL2
ABCC11	IL6
ABCC11	IRS1
ABCC11	ITGB1
ABCC11	ITGB3BP
ABCC11	KCNK15-AS1
ABCC11	KDM5B
ABCC11	KDR
ABCC11	KIT
ABCC11	KLF3-AS1
ABCC11	KLK10
ABCC11	KRT14
ABCC11	KRT18
ABCC11	KRT19
ABCC11	KRT5
ABCC11	KRT8
ABCC11	LASP1
ABCC11	LINC00160
ABCC11	LINC00472
ABCC11	LINC00511
ABCC11	LINC00628
ABCC11	LINC00636
ABCC11	LINC00993
ABCC11	LINC01016
ABCC11	LINC01089
ABCC11	LSINCT5
ABCC11	MAGED2
ABCC11	MAGI2-AS3
ABCC11	MAPK10
ABCC11	MAPK12
ABCC11	MAPK14
ABCC11	MAPK3
ABCC11	MAPK8
ABCC11	MAPK9
ABCC11	MCM2
ABCC11	MEG3
ABCC11	MET
ABCC11	MIAT
ABCC11	MIR205
ABCC11	MIR2052HG
ABCC11	MMP1
ABCC11	MMP9
ABCC11	MNX1-AS1
ABCC11	MSH6
ABCC11	MSR1
ABCC11	MST1R
ABCC11	MTA1
ABCC11	MUC1
ABCC11	MUCL1
ABCC11	NAT2
ABCC11	NBAT1
ABCC11	NCOA1
ABCC11	NCOA3
ABCC11	NF1
ABCC11	NNT-AS1
ABCC11	NOTCH1
ABCC11	NOTCH4
ABCC11	NQO1
ABCC11	NQO2
ABCC11	NR3C1
ABCC11	NRG1
ABCC11	NRP1
ABCC11	NTRK3
ABCC11	PAK1
ABCC11	PALB2
ABCC11	PBOV1
ABCC11	PDGFRB
ABCC11	PELP1
ABCC11	PGR
ABCC11	PIK3CA
ABCC11	PIK3CG
ABCC11	PIK3R1
ABCC11	PINK1-AS
ABCC11	PIP
ABCC11	PLK1
ABCC11	PPM1D
ABCC11	PRKACA
ABCC11	PRL
ABCC11	PRLR
ABCC11	PTEN
ABCC11	PTENP1
ABCC11	PTHLH
ABCC11	PTK6
ABCC11	PTN
ABCC11	PTPRG-AS1
ABCC11	PVT1
ABCC11	RAD51D
ABCC11	RARB
ABCC11	RB1
ABCC11	RBBP8
ABCC11	RHOA
ABCC11	RHOBTB2
ABCC11	RHOC
ABCC11	RMST
ABCC11	RRAS2
ABCC11	S100A4
ABCC11	SCGB2A2
ABCC11	SERPINB5
ABCC11	SERPINE1
ABCC11	SFN
ABCC11	SGK3
ABCC11	SHBG
ABCC11	SHC1
ABCC11	SLC22A18
ABCC11	SLC9A3R1
ABCC11	SMAD2
ABCC11	SMAD7
ABCC11	SNAI2
ABCC11	SNCG
ABCC11	SNHG16
ABCC11	SNHG7
ABCC11	SOX2-OT
ABCC11	SPRY4-IT1
ABCC11	SRC
ABCC11	ST14
ABCC11	ST8SIA6-AS1
ABCC11	STAT1
ABCC11	STS
ABCC11	TACC1
ABCC11	TEK
ABCC11	TERT
ABCC11	TFAP2C
ABCC11	TFF1
ABCC11	TGFA
ABCC11	TGFB1
ABCC11	TGFBR2
ABCC11	TIMP3
ABCC11	TIMP4
ABCC11	TNF
ABCC11	TNFSF10
ABCC11	TNFSF11
ABCC11	TOX3
ABCC11	TP53
ABCC11	TP53BP1
ABCC11	TPD52L2
ABCC11	TRIM25
ABCC11	TUG1
ABCC11	TWIST1
ABCC11	TYMP
ABCC11	TYMS
ABCC11	VEGFA
ABCC11	VEGFC
ABCC11	WNT1
ABCC11	WNT10B
ABCC11	WNT5A
ABCC11	WWOX
ABCC11	XBP1
ABCC11	XIST
ABCC11	XRCC2
ABCC11	XRCC3
ABCC11	YBX1
ABCC11	ZNF667-AS1
ABCC11	ZNF703
ABCG2	AHR
ABCG2	ARID4B
ABCG2	BARD1
ABCG2	BCAS1
ABCG2	BCAS3
ABCG2	BCL2
ABCG2	BMP1
ABCG2	BRAF
ABCG2	BSG
ABCG2	CA9
ABCG2	CASC2
ABCG2	CASP9
ABCG2	CD44
ABCG2	CDK1
ABCG2	CDK4
ABCG2	CDKN1B
ABCG2	CDKN2B-AS1
ABCG2	CEP85L
ABCG2	CLDND1
ABCG2	CXCR4
ABCG2	CYCS
ABCG2	CYP19A1
ABCG2	DANCR
ABCG2	DNMT3B
ABCG2	EP300
ABCG2	ESR1
ABCG2	ESRRA
ABCG2	FASN
ABCG2	FBXW7
ABCG2	FOS
ABCG2	FOXC1
ABCG2	FOXC2-AS1
ABCG2	GLI1
ABCG2	GPX1
ABCG2	HDAC1
ABCG2	HGF
ABCG2	HIF1A-AS2
ABCG2	IDH1
ABCG2	IGF1
ABCG2	IGF1R
ABCG2	IGF2
ABCG2	ING1
ABCG2	ITGB3BP
ABCG2	JUN
ABCG2	KDM5B
ABCG2	KIAA0100
ABCG2	KLF3-AS1
ABCG2	KLLN
ABCG2	LINC00339
ABCG2	LINC00472
ABCG2	MAGED2
ABCG2	MAPK3
ABCG2	MAPK8
ABCG2	MIR663A
ABCG2	MMP14
ABCG2	MMP17
ABCG2	MMP2
ABCG2	MSH2
ABCG2	MTOR
ABCG2	NBN
ABCG2	NCOA1
ABCG2	NCOA3
ABCG2	NET1
ABCG2	NF1
ABCG2	NME1
ABCG2	NNT-AS1
ABCG2	NQO2
ABCG2	PARP1
ABCG2	PBOV1
ABCG2	PHB
ABCG2	PPM1D
ABCG2	PTGS2
ABCG2	PTK2
ABCG2	RB1CC1
ABCG2	SGK3
ABCG2	SLC22A18
ABCG2	SMAD4
ABCG2	SNHG16
ABCG2	SOX2-OT
ABCG2	ST8SIA6-AS1
ABCG2	STMN1
ABCG2	SULT1E1
ABCG2	TIMP4
ABCG2	TRIM24
ABCG2	TUG1
ABCG2	ZNF667-AS1
ADARB2-AS1	APOD
ADARB2-AS1	AXL
ADARB2-AS1	BAG1
ADARB2-AS1	BRCA1
ADARB2-AS1	BRMS1
ADARB2-AS1	BRMS1L
ADARB2-AS1	CAV1
ADARB2-AS1	CCAT1
ADARB2-AS1	CDC27
ADARB2-AS1	CDK4
ADARB2-AS1	CEP85L
ADARB2-AS1	CLCA2
ADARB2-AS1	CXCR4
ADARB2-AS1	DANCR
ADARB2-AS1	DDR1
ADARB2-AS1	DLEU1
ADARB2-AS1	EFNA3
ADARB2-AS1	EGF
ADARB2-AS1	ESRRA
ADARB2-AS1	ETV4
ADARB2-AS1	FGFR1
ADARB2-AS1	GAS5
ADARB2-AS1	H19
ADARB2-AS1	HOTAIR
ADARB2-AS1	HOXA-AS2
ADARB2-AS1	HRAS
ADARB2-AS1	IRS1
ADARB2-AS1	KDR
ADARB2-AS1	KIT
ADARB2-AS1	KLK10
ADARB2-AS1	KRAS
ADARB2-AS1	MET
ADARB2-AS1	MIR22
ADARB2-AS1	MIR663A
ADARB2-AS1	MNX1-AS1
ADARB2-AS1	MST1R
ADARB2-AS1	MTA1
ADARB2-AS1	MUCL1
ADARB2-AS1	NAT2
ADARB2-AS1	NKILA
ADARB2-AS1	NNT-AS1
ADARB2-AS1	PALB2
ADARB2-AS1	PELP1
ADARB2-AS1	PIP
ADARB2-AS1	PVT1
ADARB2-AS1	RASSF1-AS1
ADARB2-AS1	SLC9A3R1
ADARB2-AS1	STK11
ADARB2-AS1	TEK
ADARB2-AS1	TERT
ADARB2-AS1	TGFBR1
ADARB2-AS1	TGFBR2
ADARB2-AS1	TP53
ADARB2-AS1	XIST
ADARB2-AS1	ZFAS1
AHR	AKAP13
AHR	AKT1
AHR	AKT2
AHR	ALDH1A1
AHR	AR
AHR	ARID4B
AHR	ATM
AHR	AURKA
AHR	AXL
AHR	BAK1
AHR	BARD1
AHR	BCAR1
AHR	BCAS3
AHR	BIRC5
AHR	BMP1
AHR	BMPR1A
AHR	BRAF
AHR	BRMS1L
AHR	BSG
AHR	CASC2
AHR	CASP7
AHR	CASP9
AHR	CCND2
AHR	CCNE1
AHR	CD44
AHR	CDC27
AHR	CDH3
AHR	CDK2
AHR	CDK6
AHR	CDKN1A
AHR	CDKN1B
AHR	CEP85L
AHR	CLDND1
AHR	CTCF
AHR	CTNNB1
AHR	CXCL12
AHR	CXCR4
AHR	CYP1A1
AHR	CYP1B1
AHR	DANCR
AHR	DNMT3B
AHR	EIF4E
AHR	EP300
AHR	ERVH48-1
AHR	ESRRA
AHR	FASN
AHR	FBLN1
AHR	FBXW7
AHR	FGF1
AHR	FGF2
AHR	FLT1
AHR	FOS
AHR	FOXC1
AHR	GADD45A
AHR	GAS5
AHR	GLI1
AHR	GPX1
AHR	GRB2
AHR	HBEGF
AHR	HFE
AHR	HGF
AHR	HIF1A
AHR	HOXA-AS2
AHR	HPR
AHR	HRAS
AHR	IDH1
AHR	IGF1R
AHR	IGF2
AHR	IL6
AHR	ITGB3BP
AHR	JUN
AHR	KDM5B
AHR	KDR
AHR	KIAA0100
AHR	KLF3-AS1
AHR	KLLN
AHR	KRAS
AHR	LINC00511
AHR	LINC00636
AHR	LINC01116
AHR	MAPK1
AHR	MAPK3
AHR	MAPK8
AHR	MAPK9
AHR	MDM2
AHR	MET
AHR	MIAT
AHR	MIR143
AHR	MMP17
AHR	MSH6
AHR	MYC
AHR	NBAT1
AHR	NBN
AHR	NCOA1
AHR	NCOA6
AHR	NF1
AHR	NME1
AHR	NNT-AS1
AHR	NQO2
AHR	NR3C1
AHR	NRP1
AHR	PHB
AHR	PIK3CG
AHR	PLAU
AHR	PLK1
AHR	PPM1D
AHR	PRKCA
AHR	PTGS2
AHR	PTHLH
AHR	PTK2
AHR	PTPRC
AHR	PTPRG-AS1
AHR	PVT1
AHR	RAD51
AHR	RARA
AHR	RASSF1-AS1
AHR	RB1
AHR	RB1CC1
AHR	RBBP8
AHR	ROBO1
AHR	RPS6KB1
AHR	S100A7
AHR	SMAD2
AHR	SMAD4
AHR	SNCG
AHR	SNHG15
AHR	SNHG16
AHR	SOX2-OT
AHR	SP1
AHR	SPRY4-IT1
AHR	ST18
AHR	STMN1
AHR	SUSD2
AHR	TEK
AHR	TGFA
AHR	TGFB1
AHR	TIMP2
AHR	TIMP4
AHR	TNFSF10
AHR	TOP1
AHR	TP53
AHR	TP53BP1
AHR	TPD52L2
AHR	TRIM24
AHR	TUG1
AHR	VEGFC
AHR	WNT10B
AHR	WWOX
AHR	ZNF667-AS1
AKAP13	AKIP1
AKAP13	AMPH
AKAP13	APC
AKAP13	ARID4B
AKAP13	ATM
AKAP13	ATR
AKAP13	AXL
AKAP13	BARD1
AKAP13	BCAS1
AKAP13	BCAS3
AKAP13	BECN1
AKAP13	BMP1
AKAP13	BRAF
AKAP13	BRCA2
AKAP13	CASP3
AKAP13	CASP8
AKAP13	CASP9
AKAP13	CCAT2
AKAP13	CCNA2
AKAP13	CCNB1
AKAP13	CCND2
AKAP13	CCND3
AKAP13	CDC25B
AKAP13	CDC27
AKAP13	CDK2
AKAP13	CDK4
AKAP13	CDKN1A
AKAP13	CEP85L
AKAP13	CSF1R
AKAP13	CSK
AKAP13	CTNNB1
AKAP13	CTTN
AKAP13	CXCR4
AKAP13	CYP17A1
AKAP13	DPP10-AS1
AKAP13	E2F3
AKAP13	ECM1
AKAP13	EGFR
AKAP13	EP300
AKAP13	EREG
AKAP13	ERVH48-1
AKAP13	ESR2
AKAP13	EZH2
AKAP13	FBXW7
AKAP13	FGF2
AKAP13	FGFR1
AKAP13	FOXO1
AKAP13	GADD45A
AKAP13	GNRH1
AKAP13	GSK3B
AKAP13	GSN
AKAP13	GSTP1
AKAP13	HDAC1
AKAP13	HDAC4
AKAP13	HERC2
AKAP13	HIF1A
AKAP13	HRAS
AKAP13	HSPB1
AKAP13	IGF1
AKAP13	IGF1R
AKAP13	IGF2R
AKAP13	IGFBP3
AKAP13	KCNQ1OT1
AKAP13	KDM5B
AKAP13	KIAA0100
AKAP13	KLF3-AS1
AKAP13	KRAS
AKAP13	LINC00472
AKAP13	LINC00598
AKAP13	LINC01116
AKAP13	LINC01234
AKAP13	LSINCT5
AKAP13	MAGED2
AKAP13	MAGI2-AS3
AKAP13	MAPK1
AKAP13	MAPK14
AKAP13	MAPK8
AKAP13	MAPK9
AKAP13	MDM2
AKAP13	MEG3
AKAP13	MIAT
AKAP13	MMP14
AKAP13	MMP2
AKAP13	MSR1
AKAP13	MTA1
AKAP13	MTOR
AKAP13	MYC
AKAP13	NAT2
AKAP13	NCOA1
AKAP13	NCOA3
AKAP13	NCOA6
AKAP13	NEAT1
AKAP13	NET1
AKAP13	NF1
AKAP13	NKILA
AKAP13	PCNA
AKAP13	PDGFRB
AKAP13	PIK3CA
AKAP13	PIK3CB
AKAP13	PIK3CG
AKAP13	PIK3R1
AKAP13	PINK1-AS
AKAP13	PPM1D
AKAP13	PRKCA
AKAP13	PTEN
AKAP13	PTK2
AKAP13	PTPRC
AKAP13	RAD51C
AKAP13	RASSF1-AS1
AKAP13	RB1CC1
AKAP13	RHOC
AKAP13	RPS6KB1
AKAP13	SERPINE1
AKAP13	SHC1
AKAP13	SMAD2
AKAP13	SMAD4
AKAP13	SNHG15
AKAP13	SP1
AKAP13	SPRY4-IT1
AKAP13	ST18
AKAP13	STAT3
AKAP13	STMN1
AKAP13	STS
AKAP13	TACC1
AKAP13	TCF7L2
AKAP13	TGFBR2
AKAP13	TIMP2
AKAP13	TIMP3
AKAP13	TOP1
AKAP13	TP53BP1
AKAP13	TRIM24
AKAP13	TRIM25
AKAP13	TUG1
AKAP13	VEGFA
AKAP13	WNT10B
AKAP13	XRCC3
AKIP1	ALDH1A1
AKIP1	AMPH
AKIP1	ANKRD30A
AKIP1	APOD
AKIP1	AREG
AKIP1	ARID4B
AKIP1	ATM
AKIP1	AURKA
AKIP1	AXIN2
AKIP1	AXL
AKIP1	BARD1
AKIP1	BAX
AKIP1	BCAS1
AKIP1	BCL2
AKIP1	BCL2L1
AKIP1	BEX2
AKIP1	BIRC5
AKIP1	BMP1
AKIP1	BMP6
AKIP1	BRCA1
AKIP1	BRIP1
AKIP1	BRMS1
AKIP1	BSG
AKIP1	CA9
AKIP1	CASC2
AKIP1	CASP3
AKIP1	CAV1
AKIP1	CCNA2
AKIP1	CCNB1
AKIP1	CCNB2
AKIP1	CCNG1
AKIP1	CCNH
AKIP1	CD44
AKIP1	CDC25B
AKIP1	CDH1
AKIP1	CDH3
AKIP1	CDK1
AKIP1	CDK4
AKIP1	CDK6
AKIP1	CDK7
AKIP1	CDKN1A
AKIP1	CDKN1B
AKIP1	CDKN2B-AS1
AKIP1	CHEK1
AKIP1	CHEK2
AKIP1	CLDN7
AKIP1	CRNDE
AKIP1	CSF3
AKIP1	CSK
AKIP1	CTCF
AKIP1	CXCL12
AKIP1	CXCR4
AKIP1	CYP1A1
AKIP1	DANCR
AKIP1	DLEU1
AKIP1	DNMT3B
AKIP1	DRAIC
AKIP1	E2F1
AKIP1	E2F3
AKIP1	ECT2
AKIP1	EFNA3
AKIP1	EGF
AKIP1	EGFR
AKIP1	EGOT
AKIP1	EPCAM
AKIP1	ERBB2
AKIP1	ERBB3
AKIP1	ERBB4
AKIP1	EREG
AKIP1	ESR1
AKIP1	ESR2
AKIP1	ESRRA
AKIP1	ETV4
AKIP1	EZH2
AKIP1	FASN
AKIP1	FBLN1
AKIP1	FGF1
AKIP1	FGF2
AKIP1	FGFR2
AKIP1	FLT1
AKIP1	FOS
AKIP1	FOSL1
AKIP1	FOXA1
AKIP1	FOXC1
AKIP1	FOXO1
AKIP1	GAS5
AKIP1	GATA3
AKIP1	GLI1
AKIP1	GRB7
AKIP1	GRN
AKIP1	GSK3B
AKIP1	GSN
AKIP1	GSTP1
AKIP1	HDAC1
AKIP1	HEATR6
AKIP1	HFE
AKIP1	HGF
AKIP1	HMMR
AKIP1	HOXA-AS2
AKIP1	HPR
AKIP1	HRAS
AKIP1	HSPB1
AKIP1	IDH1
AKIP1	IGF1
AKIP1	IGF2
AKIP1	IGF2R
AKIP1	IGFBP3
AKIP1	IGKV1-5
AKIP1	IL2
AKIP1	ING1
AKIP1	ITGB1
AKIP1	ITGB3BP
AKIP1	JUN
AKIP1	KIAA0100
AKIP1	KIF15
AKIP1	KIT
AKIP1	KLF3-AS1
AKIP1	KLK10
AKIP1	KLLN
AKIP1	KRT14
AKIP1	KRT18
AKIP1	KRT19
AKIP1	KRT5
AKIP1	KRT8
AKIP1	LINC00160
AKIP1	LINC00339
AKIP1	LINC00511
AKIP1	LINC00598
AKIP1	LINC00636
AKIP1	LINC00993
AKIP1	LINC01016
AKIP1	LINC01089
AKIP1	LINC01116
AKIP1	MAGED2
AKIP1	MAGI2-AS3
AKIP1	MAPK10
AKIP1	MAPK3
AKIP1	MCM2
AKIP1	MDM2
AKIP1	MIR29C
AKIP1	MLH1
AKIP1	MMP11
AKIP1	MSH2
AKIP1	MSH6
AKIP1	MSR1
AKIP1	MST1R
AKIP1	MTA1
AKIP1	MTOR
AKIP1	MUC1
AKIP1	MUCL1
AKIP1	MYC
AKIP1	NAT2
AKIP1	NBAT1
AKIP1	NBN
AKIP1	NCOA3
AKIP1	NKILA
AKIP1	NNT-AS1
AKIP1	NOTCH4
AKIP1	NRG1
AKIP1	PAK1
AKIP1	PALB2
AKIP1	PARP1
AKIP1	PCNA
AKIP1	PDCD4-AS1
AKIP1	PELP1
AKIP1	PGR
AKIP1	PIK3CA
AKIP1	PIK3CG
AKIP1	PIP
AKIP1	PLAU
AKIP1	PRLR
AKIP1	PTEN
AKIP1	PTENP1
AKIP1	PTGS2
AKIP1	PTHLH
AKIP1	PTK6
AKIP1	PTN
AKIP1	PTPRG-AS1
AKIP1	PVT1
AKIP1	RAD51
AKIP1	RAD51C
AKIP1	RAD51D
AKIP1	RAD54L
AKIP1	RARA
AKIP1	RARB
AKIP1	RB1CC1
AKIP1	RHOBTB2
AKIP1	RMST
AKIP1	RPS6KB1
AKIP1	RRAS2
AKIP1	S100A4
AKIP1	S100A7
AKIP1	SCGB2A2
AKIP1	SERPINB5
AKIP1	SERPINE1
AKIP1	SFN
AKIP1	SGK3
AKIP1	SHC1
AKIP1	SKP2
AKIP1	SLC22A18
AKIP1	SLC9A3R1
AKIP1	SMAD2
AKIP1	SMAD7
AKIP1	SNAI2
AKIP1	SNHG16
AKIP1	SOX2-OT
AKIP1	SPRY4-IT1
AKIP1	SRC
AKIP1	ST14
AKIP1	ST8SIA6-AS1
AKIP1	STAT3
AKIP1	STK11
AKIP1	STMN1
AKIP1	STS
AKIP1	SUSD2
AKIP1	TACC1
AKIP1	TERT
AKIP1	TFAP2C
AKIP1	TFF1
AKIP1	TGFA
AKIP1	TGFB1
AKIP1	TGFBR2
AKIP1	TIMELESS
AKIP1	TIMP1
AKIP1	TIMP2
AKIP1	TIMP3
AKIP1	TIMP4
AKIP1	TNF
AKIP1	TNFSF10
AKIP1	TOP2A
AKIP1	TP53
AKIP1	TP53BP1
AKIP1	TYMS
AKIP1	VEGFA
AKIP1	WNT1
AKIP1	WNT10B
AKIP1	WNT5A
AKIP1	WT1-AS
AKIP1	WWOX
AKIP1	XBP1
AKIP1	XIST
AKIP1	XRCC2
AKIP1	XRCC3
AKIP1	YBX1
AKIP1	ZFAS1
AKIP1	ZNF667-AS1
AKIP1	ZNF703
AKT1	AKT2
AKT1	ALDH1A1
AKT1	APOD
AKT1	AR
AKT1	ARID4B
AKT1	ATM
AKT1	BAG1
AKT1	BAK1
AKT1	BARD1
AKT1	BCAR3
AKT1	BCAS1
AKT1	BCL2L1
AKT1	BCYRN1
AKT1	BECN1
AKT1	BEX2
AKT1	BMP1
AKT1	BMPR1A
AKT1	BRMS1
AKT1	BSG
AKT1	CCNA2
AKT1	CCND1
AKT1	CCND3
AKT1	CCNE1
AKT1	CCNH
AKT1	CDC42
AKT1	CDH1
AKT1	CDH3
AKT1	CDK6
AKT1	CDKN1B
AKT1	CDKN2B-AS1
AKT1	CEP85L
AKT1	CHEK2
AKT1	CLDND1
AKT1	CSF3
AKT1	CTCF
AKT1	CTSD
AKT1	CTTN
AKT1	CXCL12
AKT1	CXCR4
AKT1	CYCS
AKT1	CYP17A1
AKT1	CYP1A1
AKT1	CYP1B1
AKT1	DDR1
AKT1	DIRC3
AKT1	DNMT3B
AKT1	E2F3
AKT1	EFNA3
AKT1	EGF
AKT1	EPCAM
AKT1	ERBB2
AKT1	ERBB3
AKT1	ESR1
AKT1	ESR2
AKT1	ESRRA
AKT1	FASN
AKT1	FBLN1
AKT1	FGF1
AKT1	FGF14-AS2
AKT1	FGF8
AKT1	FGFR1
AKT1	FGFR2
AKT1	FOS
AKT1	FOSL1
AKT1	FOXC1
AKT1	FOXO1
AKT1	GAS5
AKT1	GNAS
AKT1	GPX1
AKT1	GRB2
AKT1	GRB7
AKT1	GRN
AKT1	GSK3B
AKT1	GSN
AKT1	GSTP1
AKT1	HDAC1
AKT1	HERC2
AKT1	HFE
AKT1	HGF
AKT1	HOTAIR
AKT1	HPR
AKT1	HRAS
AKT1	IDH1
AKT1	IGF1
AKT1	IGF1R
AKT1	IGF2R
AKT1	IGFBP3
AKT1	IGKV1-5
AKT1	IL2
AKT1	ITGB3BP
AKT1	JUN
AKT1	KIAA0100
AKT1	KIT
AKT1	KLF3-AS1
AKT1	KLK10
AKT1	KLLN
AKT1	KRT14
AKT1	KRT18
AKT1	KRT19
AKT1	KRT5
AKT1	LASP1
AKT1	LINC00598
AKT1	LINC01016
AKT1	LINC01116
AKT1	MAGED2
AKT1	MALAT1
AKT1	MAPK12
AKT1	MAPK14
AKT1	MCM2
AKT1	MDM2
AKT1	MIAT
AKT1	MIR29C
AKT1	MMP17
AKT1	MSH2
AKT1	MSH6
AKT1	MST1R
AKT1	MTA1
AKT1	MTOR
AKT1	NBAT1
AKT1	NME1
AKT1	NNT-AS1
AKT1	NOTCH1
AKT1	NQO1
AKT1	NQO2
AKT1	NRG1
AKT1	PAK1
AKT1	PGR
AKT1	PHB
AKT1	PIK3CG
AKT1	PLK1
AKT1	PPM1D
AKT1	PRKACA
AKT1	PRKCA
AKT1	PRLR
AKT1	PTEN
AKT1	PTENP1
AKT1	PTGS2
AKT1	PTK6
AKT1	PTN
AKT1	PTPRC
AKT1	PVT1
AKT1	RARB
AKT1	RASSF1-AS1
AKT1	RBBP8
AKT1	RHOA
AKT1	RMST
AKT1	RRAS2
AKT1	SERPINB5
AKT1	SGK3
AKT1	SHBG
AKT1	SHC1
AKT1	SMAD7
AKT1	SNAI2
AKT1	SNHG16
AKT1	SNHG7
AKT1	SOX2-OT
AKT1	SPRY4-IT1
AKT1	SRA1
AKT1	STAT3
AKT1	STK11
AKT1	STS
AKT1	SUSD2
AKT1	TACC1
AKT1	TFAP2C
AKT1	TGFA
AKT1	TIMP2
AKT1	TIMP4
AKT1	TNFSF10
AKT1	TOP1
AKT1	TOX3
AKT1	TP53BP1
AKT1	TP73-AS1
AKT1	TPD52L2
AKT1	TSG101
AKT1	TWIST1
AKT1	TYMP
AKT1	VEGFA
AKT1	WNT10B
AKT1	WNT5A
AKT1	YBX1
AKT1	ZNF667-AS1
AKT2	ALK
AKT2	ANXA1
AKT2	AR
AKT2	BCAS3
AKT2	BCL2
AKT2	BCYRN1
AKT2	BEX2
AKT2	BMP1
AKT2	BRCA1
AKT2	BRMS1L
AKT2	BSG
AKT2	CAV1
AKT2	CCAT1
AKT2	CCND1
AKT2	CCND2
AKT2	CCNH
AKT2	CDC27
AKT2	CDC42
AKT2	CDH1
AKT2	CTSD
AKT2	CTTN
AKT2	CYP17A1
AKT2	CYP1B1
AKT2	DIRC3
AKT2	EPCAM
AKT2	EPOR
AKT2	ERBB3
AKT2	ESR2
AKT2	ESRRA
AKT2	FASN
AKT2	FGF14-AS2
AKT2	FGF8
AKT2	FGFR1
AKT2	FOXO1
AKT2	GAS5
AKT2	GNAS
AKT2	GPER1
AKT2	GPX1
AKT2	GRB2
AKT2	GRB7
AKT2	GRN
AKT2	GSK3B
AKT2	GSN
AKT2	HDAC4
AKT2	HERC2
AKT2	HGF
AKT2	HIF1A-AS2
AKT2	HMMR-AS1
AKT2	HOTTIP
AKT2	HOXA11-AS
AKT2	HSPB1
AKT2	IDH1
AKT2	IGF1
AKT2	IGF2R
AKT2	IGFBP5
AKT2	IGKV1-5
AKT2	ITGB1
AKT2	KCNQ1OT1
AKT2	KIAA0100
AKT2	KIT
AKT2	KLK10
AKT2	KLLN
AKT2	KRT14
AKT2	KRT18
AKT2	KRT19
AKT2	KRT5
AKT2	KRT8
AKT2	LASP1
AKT2	LINC00160
AKT2	LINC00598
AKT2	LINC01016
AKT2	MAGI2-AS3
AKT2	MAPK1
AKT2	MAPK10
AKT2	MAPK12
AKT2	MAPK14
AKT2	MDM2
AKT2	MIR29C
AKT2	MMP13
AKT2	MMP17
AKT2	MTA1
AKT2	MUC1
AKT2	NEAT1
AKT2	NOTCH1
AKT2	NOTCH4
AKT2	NQO2
AKT2	NR3C1
AKT2	NRG1
AKT2	OR3A4P
AKT2	PGR
AKT2	PIK3CA
AKT2	PIK3CB
AKT2	PLK1
AKT2	PRDM14
AKT2	PRKACA
AKT2	PRL
AKT2	PTEN
AKT2	PTENP1
AKT2	PTK6
AKT2	PTN
AKT2	PVT1
AKT2	RAD51D
AKT2	RASSF1-AS1
AKT2	RBBP8
AKT2	RMST
AKT2	ROBO1
AKT2	RRAS2
AKT2	SCGB2A2
AKT2	SERPINB5
AKT2	SFN
AKT2	SGK3
AKT2	SHBG
AKT2	SHC1
AKT2	SKP2
AKT2	SMAD2
AKT2	SMAD7
AKT2	SNAI2
AKT2	SNCG
AKT2	SNHG7
AKT2	SP1
AKT2	SPRY4-IT1
AKT2	ST14
AKT2	STK11
AKT2	STS
AKT2	TCF7L2
AKT2	TFAP2C
AKT2	TGFA
AKT2	TIMP4
AKT2	TOX3
AKT2	TPD52L2
AKT2	TRIM25
AKT2	VEGFA
AKT2	XBP1
AKT2	XRCC3
AKT2	YBX1
ALDH1A1	ANKRD30A
ALDH1A1	APOD
ALDH1A1	ARFGEF3
ALDH1A1	ARID4B
ALDH1A1	AXL
ALDH1A1	BAG1
ALDH1A1	BAK1
ALDH1A1	BARD1
ALDH1A1	BCAR3
ALDH1A1	BCAS1
ALDH1A1	BCAS3
ALDH1A1	BCL2
ALDH1A1	BCL2L1
ALDH1A1	BCYRN1
ALDH1A1	BEX2
ALDH1A1	BMP1
ALDH1A1	BMPR1A
ALDH1A1	BRAF
ALDH1A1	BRIP1
ALDH1A1	BRMS1
ALDH1A1	BSG
ALDH1A1	CA9
ALDH1A1	CASC2
ALDH1A1	CASP3
ALDH1A1	CASP7
ALDH1A1	CASP9
ALDH1A1	CCND3
ALDH1A1	CCNE1
ALDH1A1	CD44
ALDH1A1	CDH1
ALDH1A1	CDH3
ALDH1A1	CDK1
ALDH1A1	CDK2
ALDH1A1	CDK6
ALDH1A1	CDKN1B
ALDH1A1	CDKN2B-AS1
ALDH1A1	CEP85L
ALDH1A1	CHEK2
ALDH1A1	CLDND1
ALDH1A1	CSF1R
ALDH1A1	CSK
ALDH1A1	CTCF
ALDH1A1	CXCL12
ALDH1A1	CXCR4
ALDH1A1	CYCS
ALDH1A1	CYP1A1
ALDH1A1	DNMT3B
ALDH1A1	DRAIC
ALDH1A1	E2F3
ALDH1A1	EGF
ALDH1A1	EGOT
ALDH1A1	EPCAM
ALDH1A1	ERBB2
ALDH1A1	ERBB3
ALDH1A1	ERBB4
ALDH1A1	ESR1
ALDH1A1	ESR2
ALDH1A1	ESRRA
ALDH1A1	ETV4
ALDH1A1	FASN
ALDH1A1	FBLN1
ALDH1A1	FGF1
ALDH1A1	FGFR1
ALDH1A1	FGFR2
ALDH1A1	FLT4
ALDH1A1	FOS
ALDH1A1	FOSL1
ALDH1A1	FOXA1
ALDH1A1	FOXC1
ALDH1A1	FOXO1
ALDH1A1	GADD45A
ALDH1A1	GAS5
ALDH1A1	GATA3
ALDH1A1	GLI1
ALDH1A1	GNRH1
ALDH1A1	GPX1
ALDH1A1	GRB2
ALDH1A1	GRB7
ALDH1A1	HBEGF
ALDH1A1	HDAC1
ALDH1A1	HDAC4
ALDH1A1	HERC2
ALDH1A1	HFE
ALDH1A1	HGF
ALDH1A1	HOTAIR
ALDH1A1	HOXA-AS2
ALDH1A1	HPR
ALDH1A1	IDH1
ALDH1A1	IGF1
ALDH1A1	IGF1R
ALDH1A1	IGF2
ALDH1A1	IGF2R
ALDH1A1	IGFBP5
ALDH1A1	IGKV1-5
ALDH1A1	IL6
ALDH1A1	ING1
ALDH1A1	ITGB3BP
ALDH1A1	JUN
ALDH1A1	KCNK15-AS1
ALDH1A1	KDM5B
ALDH1A1	KIAA0100
ALDH1A1	KIT
ALDH1A1	KLF3-AS1
ALDH1A1	KLK10
ALDH1A1	KLLN
ALDH1A1	KRT14
ALDH1A1	KRT18
ALDH1A1	KRT19
ALDH1A1	KRT5
ALDH1A1	KRT8
ALDH1A1	LASP1
ALDH1A1	LINC00472
ALDH1A1	LINC00511
ALDH1A1	LINC00598
ALDH1A1	LINC00636
ALDH1A1	LINC00993
ALDH1A1	LINC01016
ALDH1A1	LINC01116
ALDH1A1	MAGED2
ALDH1A1	MAPK12
ALDH1A1	MAPK3
ALDH1A1	MAPK8
ALDH1A1	MCM2
ALDH1A1	MDM2
ALDH1A1	MEG3
ALDH1A1	MIAT
ALDH1A1	MMP11
ALDH1A1	MMP17
ALDH1A1	MSH6
ALDH1A1	MST1R
ALDH1A1	MTOR
ALDH1A1	MUCL1
ALDH1A1	NBAT1
ALDH1A1	NBN
ALDH1A1	NCOA1
ALDH1A1	NF1
ALDH1A1	NME1
ALDH1A1	NOTCH1
ALDH1A1	NOTCH4
ALDH1A1	NQO2
ALDH1A1	NR3C1
ALDH1A1	NRG1
ALDH1A1	NTRK3
ALDH1A1	PAK1
ALDH1A1	PARP1
ALDH1A1	PBOV1
ALDH1A1	PELP1
ALDH1A1	PGR
ALDH1A1	PHB
ALDH1A1	PIK3CG
ALDH1A1	PINK1-AS
ALDH1A1	PIP
ALDH1A1	PLAU
ALDH1A1	PLAUR
ALDH1A1	PPM1D
ALDH1A1	PRKCA
ALDH1A1	PRLR
ALDH1A1	PTEN
ALDH1A1	PTENP1
ALDH1A1	PTGS2
ALDH1A1	PTHLH
ALDH1A1	PTK2
ALDH1A1	PTK6
ALDH1A1	PTN
ALDH1A1	PTPRC
ALDH1A1	PTPRG-AS1
ALDH1A1	PVT1
ALDH1A1	RAD51C
ALDH1A1	RAD51D
ALDH1A1	RARA
ALDH1A1	RARB
ALDH1A1	RASSF1
ALDH1A1	ROBO1
ALDH1A1	RRAS2
ALDH1A1	S100A4
ALDH1A1	SCGB2A2
ALDH1A1	SERPINB5
ALDH1A1	SFN
ALDH1A1	SGK3
ALDH1A1	SHC1
ALDH1A1	SLC22A18
ALDH1A1	SMAD4
ALDH1A1	SNCG
ALDH1A1	SNHG16
ALDH1A1	SOX2-OT
ALDH1A1	SPRY4-IT1
ALDH1A1	SRC
ALDH1A1	ST8SIA6-AS1
ALDH1A1	STAT3
ALDH1A1	STMN1
ALDH1A1	SUSD2
ALDH1A1	TFAP2C
ALDH1A1	TGFA
ALDH1A1	TGFBR2
ALDH1A1	TIMELESS
ALDH1A1	TIMP1
ALDH1A1	TIMP2
ALDH1A1	TIMP4
ALDH1A1	TNF
ALDH1A1	TNFSF10
ALDH1A1	TOP1
ALDH1A1	TOX3
ALDH1A1	TP73-AS1
ALDH1A1	TPD52L2
ALDH1A1	TUG1
ALDH1A1	VEGFA
ALDH1A1	VEGFC
ALDH1A1	WNT10B
ALDH1A1	WNT5A
ALDH1A1	WWOX
ALDH1A1	XRCC3
ALDH1A1	YBX1
ALDH1A1	ZFAS1
ALDH1A1	ZNF667-AS1
ALDH1A1	ZNF703
ALK	ARFGEF3
ALK	ARID4B
ALK	ATM
ALK	ATR
ALK	BCAS3
ALK	BCL2
ALK	BCYRN1
ALK	BEX2
ALK	BMPR1A
ALK	BRAF
ALK	BRIP1
ALK	CASC2
ALK	CASP8
ALK	CCND3
ALK	CDH1
ALK	CDH3
ALK	CDK7
ALK	CDKN1A
ALK	CLDN7
ALK	CRNDE
ALK	CTNNB1
ALK	CTTN
ALK	CYCS
ALK	DDR1
ALK	DPP10-AS1
ALK	EFNA3
ALK	EGF
ALK	EGOT
ALK	EP300
ALK	EPCAM
ALK	ERBB2
ALK	ERBB3
ALK	ERBB4
ALK	ERVH48-1
ALK	ESR2
ALK	ETV4
ALK	FBXW7
ALK	FGF1
ALK	FGFR1
ALK	FGFR2
ALK	FHIT
ALK	FOXC1
ALK	GATA3
ALK	GNRH1
ALK	GSK3B
ALK	HFE
ALK	HOXA-AS2
ALK	IGF1R
ALK	IGKV1-5
ALK	IL2
ALK	ING1
ALK	IRS1
ALK	ITGB3BP
ALK	KCNQ1OT1
ALK	KDM5B
ALK	KIT
ALK	KLK10
ALK	KRT14
ALK	KRT19
ALK	KRT5
ALK	KRT8
ALK	LINC00472
ALK	LINC00511
ALK	LINC01089
ALK	MALAT1
ALK	MCM2
ALK	MIR205
ALK	MIR2052HG
ALK	MIR429
ALK	MSH6
ALK	MST1R
ALK	MTA1
ALK	MUC1
ALK	NCOA1
ALK	NCOA6
ALK	NEAT1
ALK	NET1
ALK	NF1
ALK	NOTCH4
ALK	NQO1
ALK	NRG1
ALK	NTRK3
ALK	PAK1
ALK	PALB2
ALK	PANDAR
ALK	PARP1
ALK	PBOV1
ALK	PDCD4-AS1
ALK	PELP1
ALK	PIK3CB
ALK	PIK3R1
ALK	PINK1-AS
ALK	PRKCA
ALK	PTK6
ALK	PTN
ALK	RAD51D
ALK	RARB
ALK	RBBP8
ALK	RHOA
ALK	S100A7
ALK	SERPINB5
ALK	SERPINE1
ALK	SFN
ALK	SLC22A18
ALK	SLC9A3R1
ALK	SMAD4
ALK	SP1
ALK	ST14
ALK	ST8SIA6-AS1
ALK	TCF7L2
ALK	TEK
ALK	TFAP2C
ALK	TGFA
ALK	TGFBR2
[truncated: 44,879 more rows]
