# Supplementary material for: Comparative Analysis of Gene Correlation Networks of Breast Cancer Patients Based on Mutations in TP53
Source: Biomolecules. 2022 Jul 13;12(7):979. doi: 10.3390/biom12070979 (PMC9313229; doi:10.3390/biom12070979)
Supplement: Supplementary file 1 [file biomolecules-12-00979-s001.zip › Supplementary Materials S5.csv]

id	project_id	gene_pair	group1	group2	logrank_p_value	fdr	hr	hr_p_value	source	target
0	wtTP53	MAPK10_PTK6	22	474	4.13e-08	0.00018	9.254	1.02e-06	MAPK10	PTK6
1	wtTP53	ECT2_HIF1A-AS2	15	481	2.11e-05	0.0148	8.616	9.470000000000001e-05	ECT2	HIF1A-AS2
2	wtTP53	HIF1A-AS2_KIF15	16	480	2.11e-05	0.0148	8.616	9.470000000000001e-05	HIF1A-AS2	KIF15
3	wtTP53	CLDN7_MAPK10	16	480	1.75e-06	0.00331	8.611	1.0199999999999999e-05	CLDN7	MAPK10
4	wtTP53	CDH3_FGFR2	13	483	3.8799999999999994e-05	0.0218	7.95	9.13e-05	CDH3	FGFR2
5	wtTP53	PTGS2_SUSD2	20	476	8.62e-09	5.36e-05	7.695	5.77e-06	PTGS2	SUSD2
6	wtTP53	LSINCT5_SUSD2	14	482	1.01e-05	0.009590000000000001	6.7860000000000005	6.11e-05	LSINCT5	SUSD2
7	wtTP53	AHR_SUSD2	29	467	5.06e-10	1.1e-05	6.557	7.85e-07	AHR	SUSD2
8	wtTP53	GLI1_RMST	14	482	1.51e-06	0.00314	6.059	3.6e-05	GLI1	RMST
9	wtTP53	CDH3_GLI1	32	464	1.3800000000000002e-09	1.88e-05	5.945	1.72e-07	CDH3	GLI1
10	wtTP53	GREB1_TOX3	22	474	2.7100000000000003e-07	0.000982	5.515	4.46e-05	GREB1	TOX3
11	wtTP53	TOX3_YBX1	24	472	2.1e-05	0.0148	5.345	4.88e-05	TOX3	YBX1
12	wtTP53	GLI1_PTENP1	30	466	1.89e-06	0.0033399999999999997	5.231	2.84e-05	GLI1	PTENP1
13	wtTP53	CDKN1A_HBEGF	25	471	1.9399999999999997e-05	0.0143	4.9719999999999995	8.05e-05	CDKN1A	HBEGF
14	wtTP53	DNMT3B_PTPRG-AS1	20	476	1.16e-08	6.3e-05	4.942	5.489999999999999e-05	DNMT3B	PTPRG-AS1
15	wtTP53	BEX2_GLI1	49	447	7.68e-09	5.36e-05	4.52	3.96e-06	BEX2	GLI1
16	wtTP53	CDKN1A_IL6	46	450	0.000134	0.042	4.493	3.6e-05	CDKN1A	IL6
17	wtTP53	ANKRD30A_NQO1	87	409	2.25e-06	0.0036299999999999995	4.013	1.95e-06	ANKRD30A	NQO1
18	wtTP53	CLCA2_SCGB2A2	59	437	3.47e-07	0.00116	3.9939999999999998	3.73e-05	CLCA2	SCGB2A2
19	wtTP53	ABCB1_RMST	58	438	4.11e-07	0.00119	3.891	1.1900000000000001e-05	ABCB1	RMST
20	wtTP53	CLCA2_PTHLH	50	446	6.91e-05	0.0292	3.8160000000000003	2.9299999999999997e-05	CLCA2	PTHLH
21	wtTP53	LINC01234_SP1	77	419	3.04e-05	0.0189	3.6510000000000002	1.06e-05	LINC01234	SP1
22	wtTP53	AMPH_IL2	62	434	1.6899999999999997e-05	0.0129	3.4789999999999996	3.18e-05	AMPH	IL2
23	wtTP53	DRAIC_FHIT	148	348	5.12e-05	0.0247	3.425	2.98e-06	DRAIC	FHIT
24	wtTP53	LINC01234_TGFBR2	61	435	1.65e-05	0.0128	3.4	7.75e-05	LINC01234	TGFBR2
25	wtTP53	PRKCA_SUSD2	58	438	3.9e-07	0.00119	3.344	3.06e-05	PRKCA	SUSD2
26	wtTP53	MIR2052HG_SCGB2A2	59	437	3.18e-06	0.00446	3.338	5.9999999999999995e-05	MIR2052HG	SCGB2A2
27	wtTP53	EREG_SUSD2	62	434	2.2899999999999998e-05	0.0149	3.2289999999999996	5.44e-05	EREG	SUSD2
28	wtTP53	AKIP1_SUSD2	79	417	1.32e-06	0.00303	3.1919999999999997	5.18e-05	AKIP1	SUSD2
29	wtTP53	H19_PGR	83	413	2.2e-05	0.0148	3.18	3.3100000000000005e-05	H19	PGR
30	wtTP53	ABCB1_SNHG16	129	367	1.51e-06	0.00314	3.1310000000000002	1.52e-05	ABCB1	SNHG16
31	wtTP53	CLCA2_GSN	222	274	8.209999999999999e-05	0.0319	3.1	4.61e-05	CLCA2	GSN
32	wtTP53	FHIT_SP1	109	387	0.000153	0.0452	3.085	3.17e-05	FHIT	SP1
33	wtTP53	AKT2_IGF1	143	353	1.68e-07	0.000666	2.915	5.920000000000001e-05	AKT2	IGF1
34	wtTP53	KDM5B_KLLN	205	291	0.0001	0.0358	2.906	6.54e-05	KDM5B	KLLN
35	mTP53	KDM5B_ST14	18	243	6.19e-06	0.0407	6.712999999999999	7.51e-06	KDM5B	ST14
36	mTP53	NAT2_PBOV1	27	234	7.69e-06	0.0407	5.867999999999999	3.4899999999999995e-05	NAT2	PBOV1
37	mTP53	KIT_RHOBTB2	24	237	5.24e-06	0.0407	5.702999999999999	1.09e-05	KIT	RHOBTB2
38	mTP53	PBOV1_TWIST1	49	212	2.8e-07	0.0121	5.68	1.51e-06	PBOV1	TWIST1
39	mTP53	FLT1_MDM2	30	231	5.81e-07	0.0125	5.247000000000001	7.97e-06	FLT1	MDM2
40	mTP53	PIK3CA_PRLR	33	228	1.13e-06	0.0163	5.138999999999999	6.96e-06	PIK3CA	PRLR
41	mTP53	EPCAM_SERPINE1	28	233	6.46e-06	0.0407	4.7139999999999995	1.85e-05	EPCAM	SERPINE1
42	mTP53	CDC27_MDM2	25	236	6.92e-06	0.0407	4.644	9.7e-05	CDC27	MDM2
43	mTP53	CLDN7_PIK3CA	38	223	8.5e-06	0.0407	4.082	6.790000000000001e-05	CLDN7	PIK3CA
