# Supplementary material for: Comparative Analysis of Gene Correlation Networks of Breast Cancer Patients Based on Mutations in TP53
Source: Biomolecules. 2022 Jul 13;12(7):979. doi: 10.3390/biom12070979 (PMC9313229; doi:10.3390/biom12070979)
Supplement: Supplementary file 1 [file biomolecules-12-00979-s001.zip › Supplementary Materials S6.csv]

	gene_pair	group1	group2	gene_pair_hazard	gene_pair_p_value	CI_lower	CI_upper	age_hazard	age_p_value
9	MAPK10_PTK6	22	474	9.254486	1.02E-06	3.791951	22.586134	1.044532	0.000022
60	ECT2_HIF1A-AS2	15	481	8.616054	9.47E-05	2.922193	25.404341	1.043793	0.000025
61	HIF1A-AS2_KIF15	16	480	8.616054	9.47E-05	2.922193	25.404341	1.043793	0.000025
22	CLDN7_MAPK10	16	480	8.610686	1.02E-05	3.309548	22.403034	1.044601	0.000021
75	CDH3_FGFR2	13	483	7.949826	9.13E-05	2.814043	22.458695	1.043644	0.000024
331	ERBB2_ITGB3BP	22	474	7.759598	3.90E-05	2.923248	20.59742	1.047165	0.000005
6	PTGS2_SUSD2	20	476	7.694693	5.77E-06	3.18548	18.586936	1.04085	0.000077
44	LSINCT5_SUSD2	14	482	6.785909	6.11E-05	2.660629	17.307398	1.041757	0.000029
1	AHR_SUSD2	29	467	6.556897	7.85E-07	3.108892	13.829007	1.036723	0.000138
20	GLI1_RMST	14	482	6.059398	3.60E-05	2.577897	14.242734	1.042129	0.000047
3	CDH3_GLI1	32	464	5.944721	1.72E-07	3.047059	11.597974	1.04295	0.000051
4	CDH3_GLI1	32	464	5.944721	1.72E-07	3.047059	11.597974	1.04295	0.000051
2	CDH3_GLI1	32	464	5.944721	1.72E-07	3.047059	11.597974	1.04295	0.000051
670	ERBB2_LINC00160	27	469	5.671099	5.36E-05	2.443386	13.162618	1.04976	0.000003
11	GREB1_TOX3	22	474	5.515082	4.46E-05	2.429501	12.519495	1.03966	0.000105
989	FGF1_SNHG16	31	465	5.435727	3.71E-05	2.43157	12.15146	1.051133	0.000001
59	TOX3_YBX1	24	472	5.345426	4.88E-05	2.380524	12.003061	1.04211	0.000026
23	GLI1_PTENP1	30	466	5.230552	2.84E-05	2.410496	11.349813	1.042262	0.000051
58	CDKN1A_HBEGF	25	471	4.972067	8.05E-05	2.240322	11.034775	1.043369	0.000035
8	DNMT3B_PTPRG-AS1	20	476	4.942324	5.49E-05	2.273747	10.742872	1.036834	0.000417
7	DNMT3B_PTPRG-AS1	20	476	4.942324	5.49E-05	2.273747	10.742872	1.036834	0.000417
5	BEX2_GLI1	49	447	4.520431	3.96E-06	2.381416	8.580736	1.038311	0.000242
138	CDKN1A_IL6	46	450	4.492643	3.60E-05	2.202882	9.16247	1.044837	0.00001
26	ANKRD30A_NQO1	87	409	4.012889	1.95E-06	2.264077	7.112513	1.046749	0.000013
27	ANKRD30A_NQO1	87	409	4.012889	1.95E-06	2.264077	7.112513	1.046749	0.000013
12	CLCA2_SCGB2A2	59	437	3.994084	3.73E-05	2.068038	7.713933	1.03911	0.000207
14	ABCB1_RMST	58	438	3.890552	1.19E-05	2.118295	7.145557	1.039988	0.000096
102	CLCA2_PTHLH	50	446	3.81601	2.93E-05	2.036295	7.151191	1.046118	0.000013
69	LINC01234_SP1	77	419	3.650687	1.06E-05	2.051569	6.496256	1.044322	0.00001
173	KCNK15-AS1_PLAU	60	436	3.623167	1.82E-05	2.011122	6.527372	1.048191	0.000005
207	LINC00511_SRC	82	414	3.607356	1.91E-05	2.003198	6.49612	1.049729	0.000004
56	AMPH_IL2	62	434	3.47916	3.18E-05	1.933645	6.259967	1.042626	0.000029
89	DRAIC_FHIT	148	348	3.425201	2.98E-06	2.043617	5.740802	1.051019	0.000003
192	AXIN2_CCNG1	45	451	3.415415	8.19E-05	1.853536	6.293409	1.046099	0.000012
55	LINC01234_TGFBR2	61	435	3.400415	7.75E-05	1.85322	6.239313	1.041048	0.000063
191	CSK_HOXA-AS2	69	427	3.354767	1.86E-05	1.927681	5.838342	1.047723	0.000004
13	PRKCA_SUSD2	58	438	3.343797	3.06E-05	1.895702	5.898065	1.037403	0.000281
30	MIR2052HG_SCGB2A2	59	437	3.337952	6.00E-05	1.852714	6.013837	1.040424	0.000122
65	EREG_SUSD2	62	434	3.22917	5.44E-05	1.827464	5.706017	1.04142	0.000041
18	AKIP1_SUSD2	79	417	3.192043	5.18E-05	1.819619	5.599601	1.03783	0.000232
64	H19_PGR	83	413	3.180446	3.31E-05	1.841737	5.492224	1.042649	0.000031
19	ABCB1_SNHG16	129	367	3.130821	1.52E-05	1.866646	5.251152	1.041153	0.000106
111	CLCA2_GSN	222	274	3.099507	4.61E-05	1.798765	5.340856	1.045607	0.000012
145	FHIT_SP1	109	387	3.085181	3.17E-05	1.814674	5.245208	1.046042	0.000009
10	AKT2_IGF1	143	353	2.914811	5.92E-05	1.729237	4.913219	1.031248	0.002441
121	KDM5B_KLLN	205	291	2.906111	6.54E-05	1.721286	4.906495	1.043505	0.000016
170	CTTN_DNMT3B	105	391	2.894313	6.88E-05	1.715032	4.884485	1.047133	0.000012
179	AKT2_PTENP1	146	350	2.754828	8.37E-05	1.662685	4.564349	1.045272	0.00001
