# Supplementary material for: Comparative Analysis of Gene Correlation Networks of Breast Cancer Patients Based on Mutations in TP53
Source: Biomolecules. 2022 Jul 13;12(7):979. doi: 10.3390/biom12070979 (PMC9313229; doi:10.3390/biom12070979)
Supplement: Supplementary file 1 [file biomolecules-12-00979-s001.zip › Supplementary Materials S7.xlsx]

## Sheet: The module by WGCNA
nodeName	altName	nodeAttr.nodesPresent...
ATP6V1G1	ATP6V1G1	turquoise
C6orf15	C6orf15	turquoise
GRINA	GRINA	turquoise
KRT17	KRT17	turquoise
KRT81	KRT81	turquoise
RPS16	RPS16	turquoise
TFF3	TFF3	turquoise
ENO1	ENO1	turquoise
ILF2	ILF2	turquoise
PLAT	PLAT	turquoise
RARRES3	RARRES3	turquoise
RPS20	RPS20	turquoise
TRH	TRH	turquoise
ZNF703	ZNF703	turquoise
CGA	CGA	turquoise
HSPB1	HSPB1	turquoise
SDC4	SDC4	turquoise
SLC7A5	SLC7A5	turquoise
TOB1	TOB1	turquoise
VTCN1	VTCN1	turquoise
AGR3	AGR3	turquoise
CCND1	CCND1	turquoise
FASN	FASN	turquoise
IGFBP4	IGFBP4	turquoise
IGKC	IGKC	turquoise
RPS6	RPS6	turquoise
TFF1	TFF1	turquoise
CD63	CD63	turquoise
CIB1	CIB1	turquoise
GFRA1	GFRA1	turquoise
KRT18	KRT18	turquoise
ACTG2	ACTG2	turquoise
GAPDH	GAPDH	turquoise
KLK5	KLK5	turquoise
NAT1	NAT1	turquoise
LDHB	LDHB	turquoise
PIP	PIP	turquoise
RHOB	RHOB	turquoise
S100A4	S100A4	turquoise
TUFM	TUFM	turquoise
S100A2	S100A2	turquoise
SAA1	SAA1	turquoise
SCGB1D2	SCGB1D2	turquoise
SLC40A1	SLC40A1	turquoise
TMSB10	TMSB10	turquoise
BTG2	BTG2	turquoise
CALR	CALR	turquoise
CLTC	CLTC	turquoise
IGF1R	IGF1R	turquoise
KRT19	KRT19	turquoise
KRT7	KRT7	turquoise
XRCC2	XRCC2	turquoise
NDUFS5	NDUFS5	turquoise
CRABP1	CRABP1	turquoise
CSTB	CSTB	turquoise
IGLV2-14	IGLV2-14	turquoise
KRT14	KRT14	turquoise
SLC39A6	SLC39A6	turquoise
AGR2	AGR2	turquoise
CST5	CST5	turquoise
RPS25	RPS25	turquoise
S100A8	S100A8	turquoise
DHCR24	DHCR24	turquoise
RAD54L	RAD54L	turquoise
CA12	CA12	turquoise
CCT6A	CCT6A	turquoise
FABP7	FABP7	turquoise
IGKV1-5	IGKV1-5	turquoise
PI3	PI3	turquoise
S100A9	S100A9	turquoise
TMEM123	TMEM123	turquoise
EEF1A2	EEF1A2	turquoise
ESR1	ESR1	turquoise
LY6D	LY6D	turquoise
NQO1	NQO1	turquoise
S100A10	S100A10	turquoise
SUSD3	SUSD3	turquoise
TBC1D9	TBC1D9	turquoise
TSPAN13	TSPAN13	turquoise
GSTP1	GSTP1	turquoise
LASP1	LASP1	turquoise
PHGDH	PHGDH	turquoise
STC2	STC2	turquoise
TSG101	TSG101	turquoise
YBX1	YBX1	turquoise
CD59	CD59	turquoise
CHEK2	CHEK2	turquoise
EXOC2	EXOC2	turquoise
SLPI	SLPI	turquoise
TUBB	TUBB	turquoise
KRT5	KRT5	turquoise
LCN2	LCN2	turquoise
S100A6	S100A6	turquoise
SLC22A18	SLC22A18	turquoise
IL6ST	IL6ST	turquoise
MRFAP1	MRFAP1	turquoise
PTMA	PTMA	turquoise
RPS19	RPS19	turquoise
S100A11	S100A11	turquoise
SCGB2A2	SCGB2A2	turquoise
CEACAM6	CEACAM6	turquoise
CHI3L1	CHI3L1	turquoise
GATA3	GATA3	turquoise
KRT8	KRT8	turquoise
MMP7	MMP7	turquoise
TSPAN1	TSPAN1	turquoise
ALDOA	ALDOA	turquoise
COX6C	COX6C	turquoise
FXYD3	FXYD3	turquoise
IGHM	IGHM	turquoise
OLFM4	OLFM4	turquoise
PABPC1	PABPC1	turquoise
PIGT	PIGT	turquoise
SH3BGRL	SH3BGRL	turquoise
SLC9A3R1	SLC9A3R1	turquoise
CPB1	CPB1	turquoise
GLUL	GLUL	turquoise
KRT16	KRT16	turquoise
MAGED2	MAGED2	turquoise
SEPHS2	SEPHS2	turquoise
TCEAL4	TCEAL4	turquoise
YWHAB	YWHAB	turquoise

## Sheet: GCN by WGCNA
fromNode	toNode	weight	direction	fromAltName	toAltName
ATP6V1G1	AGR3	0.0261946	undirected	ATP6V1G1	AGR3
ATP6V1G1	AGR2	0.0269479	undirected	ATP6V1G1	AGR2
ATP6V1G1	CA12	0.0222706	undirected	ATP6V1G1	CA12
ATP6V1G1	ESR1	0.0248741	undirected	ATP6V1G1	ESR1
ATP6V1G1	TBC1D9	0.0289702	undirected	ATP6V1G1	TBC1D9
ATP6V1G1	TSPAN13	0.0273894	undirected	ATP6V1G1	TSPAN13
ATP6V1G1	GATA3	0.0256417	undirected	ATP6V1G1	GATA3
C6orf15	KRT17	0.0848555	undirected	C6orf15	KRT17
C6orf15	TFF3	0.0274393	undirected	C6orf15	TFF3
C6orf15	AGR3	0.0541336	undirected	C6orf15	AGR3
C6orf15	GFRA1	0.0225639	undirected	C6orf15	GFRA1
C6orf15	KRT18	0.029522	undirected	C6orf15	KRT18
C6orf15	ACTG2	0.0279041	undirected	C6orf15	ACTG2
C6orf15	KLK5	0.0740053	undirected	C6orf15	KLK5
C6orf15	NAT1	0.0290356	undirected	C6orf15	NAT1
C6orf15	LDHB	0.0251998	undirected	C6orf15	LDHB
C6orf15	S100A2	0.0477449	undirected	C6orf15	S100A2
C6orf15	KRT14	0.0645155	undirected	C6orf15	KRT14
C6orf15	SLC39A6	0.0211855	undirected	C6orf15	SLC39A6
C6orf15	AGR2	0.0478631	undirected	C6orf15	AGR2
C6orf15	CA12	0.049644	undirected	C6orf15	CA12
C6orf15	FABP7	0.0317142	undirected	C6orf15	FABP7
C6orf15	ESR1	0.055674	undirected	C6orf15	ESR1
C6orf15	LY6D	0.056031	undirected	C6orf15	LY6D
C6orf15	TBC1D9	0.0488141	undirected	C6orf15	TBC1D9
C6orf15	TSPAN13	0.0259902	undirected	C6orf15	TSPAN13
C6orf15	YBX1	0.0242608	undirected	C6orf15	YBX1
C6orf15	KRT5	0.0663665	undirected	C6orf15	KRT5
C6orf15	IL6ST	0.0208151	undirected	C6orf15	IL6ST
C6orf15	GATA3	0.0613568	undirected	C6orf15	GATA3
C6orf15	TSPAN1	0.0225077	undirected	C6orf15	TSPAN1
C6orf15	KRT16	0.0837274	undirected	C6orf15	KRT16
C6orf15	MAGED2	0.0256671	undirected	C6orf15	MAGED2
GRINA	KRT18	0.0294132	undirected	GRINA	KRT18
GRINA	KRT8	0.025359	undirected	GRINA	KRT8
GRINA	ALDOA	0.0310092	undirected	GRINA	ALDOA
GRINA	SLC9A3R1	0.021012	undirected	GRINA	SLC9A3R1
KRT17	KRT81	0.0214055	undirected	KRT17	KRT81
KRT17	VTCN1	0.0265457	undirected	KRT17	VTCN1
KRT17	ACTG2	0.287003	undirected	KRT17	ACTG2
KRT17	KLK5	0.328182	undirected	KRT17	KLK5
KRT17	LDHB	0.026707	undirected	KRT17	LDHB
KRT17	S100A2	0.212131	undirected	KRT17	S100A2
KRT17	SAA1	0.0990972	undirected	KRT17	SAA1
KRT17	KRT7	0.0276693	undirected	KRT17	KRT7
KRT17	KRT14	0.39184	undirected	KRT17	KRT14
KRT17	FABP7	0.0849924	undirected	KRT17	FABP7
KRT17	PI3	0.052922	undirected	KRT17	PI3
KRT17	LY6D	0.110147	undirected	KRT17	LY6D
KRT17	GSTP1	0.038007	undirected	KRT17	GSTP1
KRT17	CD59	0.0714407	undirected	KRT17	CD59
KRT17	SLPI	0.0757311	undirected	KRT17	SLPI
KRT17	KRT5	0.360028	undirected	KRT17	KRT5
KRT17	LCN2	0.0436485	undirected	KRT17	LCN2
KRT17	S100A6	0.0208875	undirected	KRT17	S100A6
KRT17	CHI3L1	0.0747997	undirected	KRT17	CHI3L1
KRT17	GATA3	0.0224385	undirected	KRT17	GATA3
KRT17	MMP7	0.108447	undirected	KRT17	MMP7
KRT17	COX6C	0.0258012	undirected	KRT17	COX6C
KRT17	OLFM4	0.127552	undirected	KRT17	OLFM4
KRT17	PIGT	0.0213488	undirected	KRT17	PIGT
KRT17	SLC9A3R1	0.0228562	undirected	KRT17	SLC9A3R1
KRT17	KRT16	0.135028	undirected	KRT17	KRT16
KRT17	SEPHS2	0.0365983	undirected	KRT17	SEPHS2
KRT81	AGR3	0.0550454	undirected	KRT81	AGR3
KRT81	IGKC	0.0601652	undirected	KRT81	IGKC
KRT81	GFRA1	0.0275704	undirected	KRT81	GFRA1
KRT81	NAT1	0.0310571	undirected	KRT81	NAT1
KRT81	IGLV2-14	0.0808992	undirected	KRT81	IGLV2-14
KRT81	SLC39A6	0.0345414	undirected	KRT81	SLC39A6
KRT81	AGR2	0.0391769	undirected	KRT81	AGR2
KRT81	CA12	0.0519472	undirected	KRT81	CA12
KRT81	IGKV1-5	0.050129	undirected	KRT81	IGKV1-5
KRT81	ESR1	0.0616354	undirected	KRT81	ESR1
KRT81	LY6D	0.0296568	undirected	KRT81	LY6D
KRT81	TBC1D9	0.0509336	undirected	KRT81	TBC1D9
KRT81	TSPAN13	0.0228117	undirected	KRT81	TSPAN13
KRT81	YBX1	0.0221222	undirected	KRT81	YBX1
KRT81	IL6ST	0.0273549	undirected	KRT81	IL6ST
KRT81	GATA3	0.0587081	undirected	KRT81	GATA3
KRT81	IGHM	0.0670672	undirected	KRT81	IGHM
KRT81	KRT16	0.033112	undirected	KRT81	KRT16
KRT81	MAGED2	0.0262274	undirected	KRT81	MAGED2
RPS16	RPS20	0.0469527	undirected	RPS16	RPS20
RPS16	RPS6	0.0383871	undirected	RPS16	RPS6
RPS16	RPS19	0.126068	undirected	RPS16	RPS19
TFF3	ENO1	0.0356374	undirected	TFF3	ENO1
TFF3	ILF2	0.0251077	undirected	TFF3	ILF2
TFF3	PLAT	0.0256397	undirected	TFF3	PLAT
TFF3	RARRES3	0.0216978	undirected	TFF3	RARRES3
TFF3	ZNF703	0.0255085	undirected	TFF3	ZNF703
TFF3	SLC7A5	0.0308576	undirected	TFF3	SLC7A5
TFF3	TOB1	0.0228371	undirected	TFF3	TOB1
TFF3	AGR3	0.166702	undirected	TFF3	AGR3
TFF3	CCND1	0.0280066	undirected	TFF3	CCND1
TFF3	IGFBP4	0.0441472	undirected	TFF3	IGFBP4
TFF3	TFF1	0.114615	undirected	TFF3	TFF1
TFF3	CD63	0.0211724	undirected	TFF3	CD63
TFF3	GFRA1	0.064323	undirected	TFF3	GFRA1
TFF3	KRT18	0.0604733	undirected	TFF3	KRT18
TFF3	NAT1	0.0736202	undirected	TFF3	NAT1
TFF3	LDHB	0.0494313	undirected	TFF3	LDHB
TFF3	PIP	0.0265478	undirected	TFF3	PIP
TFF3	RHOB	0.0496411	undirected	TFF3	RHOB
TFF3	SCGB1D2	0.0263768	undirected	TFF3	SCGB1D2
TFF3	SLC40A1	0.0252444	undirected	TFF3	SLC40A1
TFF3	BTG2	0.0277434	undirected	TFF3	BTG2
TFF3	IGF1R	0.0284404	undirected	TFF3	IGF1R
TFF3	CRABP1	0.029098	undirected	TFF3	CRABP1
TFF3	CSTB	0.027702	undirected	TFF3	CSTB
TFF3	SLC39A6	0.0494727	undirected	TFF3	SLC39A6
TFF3	AGR2	0.159815	undirected	TFF3	AGR2
TFF3	CA12	0.135168	undirected	TFF3	CA12
TFF3	FABP7	0.0287112	undirected	TFF3	FABP7
TFF3	TMEM123	0.0430477	undirected	TFF3	TMEM123
TFF3	ESR1	0.134501	undirected	TFF3	ESR1
TFF3	LY6D	0.0345646	undirected	TFF3	LY6D
TFF3	SUSD3	0.0476724	undirected	TFF3	SUSD3
TFF3	TBC1D9	0.112737	undirected	TFF3	TBC1D9
TFF3	TSPAN13	0.06759	undirected	TFF3	TSPAN13
TFF3	GSTP1	0.0268147	undirected	TFF3	GSTP1
TFF3	PHGDH	0.0378005	undirected	TFF3	PHGDH
TFF3	STC2	0.0237507	undirected	TFF3	STC2
TFF3	YBX1	0.0614602	undirected	TFF3	YBX1
TFF3	CHEK2	0.0223419	undirected	TFF3	CHEK2
TFF3	SLC22A18	0.0206495	undirected	TFF3	SLC22A18
TFF3	IL6ST	0.0539608	undirected	TFF3	IL6ST
TFF3	MRFAP1	0.020121	undirected	TFF3	MRFAP1
TFF3	SCGB2A2	0.0312844	undirected	TFF3	SCGB2A2
TFF3	CEACAM6	0.03084	undirected	TFF3	CEACAM6
TFF3	GATA3	0.113708	undirected	TFF3	GATA3
TFF3	KRT8	0.0239002	undirected	TFF3	KRT8
TFF3	TSPAN1	0.0925267	undirected	TFF3	TSPAN1
TFF3	PIGT	0.0213325	undirected	TFF3	PIGT
TFF3	SLC9A3R1	0.024006	undirected	TFF3	SLC9A3R1
TFF3	CPB1	0.0254127	undirected	TFF3	CPB1
TFF3	GLUL	0.0209966	undirected	TFF3	GLUL
TFF3	KRT16	0.0485743	undirected	TFF3	KRT16
TFF3	MAGED2	0.0559395	undirected	TFF3	MAGED2
TFF3	TCEAL4	0.0270376	undirected	TFF3	TCEAL4
ENO1	SLC7A5	0.0258433	undirected	ENO1	SLC7A5
ENO1	AGR3	0.0879081	undirected	ENO1	AGR3
ENO1	GFRA1	0.030376	undirected	ENO1	GFRA1
ENO1	GAPDH	0.0508972	undirected	ENO1	GAPDH
ENO1	NAT1	0.0417137	undirected	ENO1	NAT1
ENO1	BTG2	0.0214488	undirected	ENO1	BTG2
ENO1	SLC39A6	0.0425907	undirected	ENO1	SLC39A6
ENO1	AGR2	0.0586675	undirected	ENO1	AGR2
ENO1	S100A8	0.0223322	undirected	ENO1	S100A8
ENO1	CA12	0.0608981	undirected	ENO1	CA12
ENO1	TMEM123	0.0293628	undirected	ENO1	TMEM123
ENO1	ESR1	0.0884966	undirected	ENO1	ESR1
ENO1	SUSD3	0.0213934	undirected	ENO1	SUSD3
ENO1	TBC1D9	0.0783114	undirected	ENO1	TBC1D9
ENO1	TSPAN13	0.0306432	undirected	ENO1	TSPAN13
ENO1	PHGDH	0.0219256	undirected	ENO1	PHGDH
ENO1	YBX1	0.0332019	undirected	ENO1	YBX1
ENO1	IL6ST	0.0433747	undirected	ENO1	IL6ST
ENO1	GATA3	0.0700338	undirected	ENO1	GATA3
ENO1	TSPAN1	0.0225691	undirected	ENO1	TSPAN1
ENO1	CPB1	0.0203366	undirected	ENO1	CPB1
ENO1	KRT16	0.0308477	undirected	ENO1	KRT16
ENO1	MAGED2	0.0314679	undirected	ENO1	MAGED2
ENO1	TCEAL4	0.0255489	undirected	ENO1	TCEAL4
ILF2	AGR3	0.0408126	undirected	ILF2	AGR3
ILF2	AGR2	0.0367664	undirected	ILF2	AGR2
ILF2	RAD54L	0.0476546	undirected	ILF2	RAD54L
ILF2	CA12	0.0366049	undirected	ILF2	CA12
ILF2	ESR1	0.0385443	undirected	ILF2	ESR1
ILF2	TBC1D9	0.0338544	undirected	ILF2	TBC1D9
ILF2	TUBB	0.0219295	undirected	ILF2	TUBB
ILF2	GATA3	0.0297763	undirected	ILF2	GATA3
PLAT	AGR3	0.0366548	undirected	PLAT	AGR3
PLAT	IGFBP4	0.0244537	undirected	PLAT	IGFBP4
PLAT	NAT1	0.0211058	undirected	PLAT	NAT1
PLAT	AGR2	0.0278746	undirected	PLAT	AGR2
PLAT	RAD54L	0.0405166	undirected	PLAT	RAD54L
PLAT	CA12	0.0290904	undirected	PLAT	CA12
PLAT	ESR1	0.0311336	undirected	PLAT	ESR1
PLAT	TBC1D9	0.0314901	undirected	PLAT	TBC1D9
PLAT	GATA3	0.0243394	undirected	PLAT	GATA3
PLAT	TSPAN1	0.0200704	undirected	PLAT	TSPAN1
RARRES3	AGR3	0.0540925	undirected	RARRES3	AGR3
RARRES3	NAT1	0.0408608	undirected	RARRES3	NAT1
RARRES3	AGR2	0.0393295	undirected	RARRES3	AGR2
RARRES3	CA12	0.0517806	undirected	RARRES3	CA12
RARRES3	ESR1	0.0529465	undirected	RARRES3	ESR1
RARRES3	SUSD3	0.035538	undirected	RARRES3	SUSD3
RARRES3	TBC1D9	0.0384316	undirected	RARRES3	TBC1D9
RARRES3	YBX1	0.02119	undirected	RARRES3	YBX1
RARRES3	IL6ST	0.0318255	undirected	RARRES3	IL6ST
RARRES3	GATA3	0.0456136	undirected	RARRES3	GATA3
RARRES3	TSPAN1	0.0239674	undirected	RARRES3	TSPAN1
RPS20	RPS19	0.037741	undirected	RPS20	RPS19
TRH	AGR3	0.0327987	undirected	TRH	AGR3
TRH	IGF1R	0.0203943	undirected	TRH	IGF1R
TRH	AGR2	0.0229308	undirected	TRH	AGR2
TRH	CA12	0.0276395	undirected	TRH	CA12
TRH	TMEM123	0.0202335	undirected	TRH	TMEM123
TRH	ESR1	0.0372085	undirected	TRH	ESR1
TRH	TBC1D9	0.0323147	undirected	TRH	TBC1D9
TRH	GATA3	0.030585	undirected	TRH	GATA3
ZNF703	HSPB1	0.0231275	undirected	ZNF703	HSPB1
ZNF703	AGR3	0.0496414	undirected	ZNF703	AGR3
ZNF703	GFRA1	0.0234983	undirected	ZNF703	GFRA1
ZNF703	KRT18	0.0397465	undirected	ZNF703	KRT18
ZNF703	NAT1	0.0222805	undirected	ZNF703	NAT1
ZNF703	LDHB	0.0215993	undirected	ZNF703	LDHB
ZNF703	RHOB	0.0221868	undirected	ZNF703	RHOB
ZNF703	SLC39A6	0.0227243	undirected	ZNF703	SLC39A6
ZNF703	AGR2	0.0432026	undirected	ZNF703	AGR2
ZNF703	CA12	0.0512563	undirected	ZNF703	CA12
ZNF703	FABP7	0.0247657	undirected	ZNF703	FABP7
ZNF703	TMEM123	0.030882	undirected	ZNF703	TMEM123
ZNF703	ESR1	0.0566361	undirected	ZNF703	ESR1
ZNF703	TBC1D9	0.0429404	undirected	ZNF703	TBC1D9
ZNF703	TSPAN13	0.0213754	undirected	ZNF703	TSPAN13
ZNF703	GSTP1	0.0404968	undirected	ZNF703	GSTP1
ZNF703	PHGDH	0.0234387	undirected	ZNF703	PHGDH
ZNF703	YBX1	0.0316251	undirected	ZNF703	YBX1
ZNF703	GATA3	0.0585158	undirected	ZNF703	GATA3
ZNF703	KRT8	0.0203153	undirected	ZNF703	KRT8
ZNF703	TSPAN1	0.0205628	undirected	ZNF703	TSPAN1
ZNF703	COX6C	0.0220916	undirected	ZNF703	COX6C
ZNF703	SLC9A3R1	0.0213395	undirected	ZNF703	SLC9A3R1
ZNF703	KRT16	0.0277172	undirected	ZNF703	KRT16
ZNF703	MAGED2	0.0278896	undirected	ZNF703	MAGED2
CGA	COX6C	0.0432127	undirected	CGA	COX6C
HSPB1	AGR3	0.0308044	undirected	HSPB1	AGR3
HSPB1	RPS6	0.0208442	undirected	HSPB1	RPS6
HSPB1	KRT18	0.0638994	undirected	HSPB1	KRT18
HSPB1	LDHB	0.0247106	undirected	HSPB1	LDHB
HSPB1	KRT19	0.0231925	undirected	HSPB1	KRT19
HSPB1	AGR2	0.0285927	undirected	HSPB1	AGR2
HSPB1	CA12	0.0331701	undirected	HSPB1	CA12
HSPB1	FABP7	0.0213789	undirected	HSPB1	FABP7
HSPB1	EEF1A2	0.0217951	undirected	HSPB1	EEF1A2
HSPB1	ESR1	0.0322861	undirected	HSPB1	ESR1
HSPB1	TBC1D9	0.026989	undirected	HSPB1	TBC1D9
HSPB1	GATA3	0.0364409	undirected	HSPB1	GATA3
HSPB1	KRT8	0.0461472	undirected	HSPB1	KRT8
HSPB1	COX6C	0.0253186	undirected	HSPB1	COX6C
HSPB1	SLC9A3R1	0.0525943	undirected	HSPB1	SLC9A3R1
HSPB1	MAGED2	0.0246234	undirected	HSPB1	MAGED2
SDC4	MAGED2	0.0200576	undirected	SDC4	MAGED2
SLC7A5	AGR3	0.0720743	undirected	SLC7A5	AGR3
SLC7A5	IGFBP4	0.0253932	undirected	SLC7A5	IGFBP4
SLC7A5	GFRA1	0.0213105	undirected	SLC7A5	GFRA1
SLC7A5	GAPDH	0.0310396	undirected	SLC7A5	GAPDH
SLC7A5	NAT1	0.0374609	undirected	SLC7A5	NAT1
SLC7A5	SLC40A1	0.0222582	undirected	SLC7A5	SLC40A1
SLC7A5	BTG2	0.0368555	undirected	SLC7A5	BTG2
SLC7A5	XRCC2	0.0287656	undirected	SLC7A5	XRCC2
SLC7A5	CSTB	0.021289	undirected	SLC7A5	CSTB
SLC7A5	SLC39A6	0.0240575	undirected	SLC7A5	SLC39A6
SLC7A5	AGR2	0.0501737	undirected	SLC7A5	AGR2
SLC7A5	RAD54L	0.0561304	undirected	SLC7A5	RAD54L
SLC7A5	CA12	0.0558496	undirected	SLC7A5	CA12
SLC7A5	ESR1	0.0673159	undirected	SLC7A5	ESR1
SLC7A5	SUSD3	0.023233	undirected	SLC7A5	SUSD3
SLC7A5	TBC1D9	0.0709672	undirected	SLC7A5	TBC1D9
SLC7A5	TSPAN13	0.0203189	undirected	SLC7A5	TSPAN13
SLC7A5	STC2	0.0237523	undirected	SLC7A5	STC2
SLC7A5	YBX1	0.0231354	undirected	SLC7A5	YBX1
SLC7A5	CHEK2	0.0289317	undirected	SLC7A5	CHEK2
SLC7A5	TUBB	0.0204716	undirected	SLC7A5	TUBB
SLC7A5	IL6ST	0.0458035	undirected	SLC7A5	IL6ST
SLC7A5	GATA3	0.0532364	undirected	SLC7A5	GATA3
SLC7A5	TSPAN1	0.0231659	undirected	SLC7A5	TSPAN1
SLC7A5	MAGED2	0.0287501	undirected	SLC7A5	MAGED2
SLC7A5	TCEAL4	0.0207461	undirected	SLC7A5	TCEAL4
TOB1	AGR3	0.0313778	undirected	TOB1	AGR3
TOB1	KRT18	0.0263388	undirected	TOB1	KRT18
TOB1	RHOB	0.0237926	undirected	TOB1	RHOB
TOB1	AGR2	0.0302746	undirected	TOB1	AGR2
TOB1	CA12	0.0301313	undirected	TOB1	CA12
TOB1	ESR1	0.0308449	undirected	TOB1	ESR1
TOB1	TBC1D9	0.0294184	undirected	TOB1	TBC1D9
TOB1	TSPAN13	0.0225336	undirected	TOB1	TSPAN13
TOB1	GATA3	0.0316352	undirected	TOB1	GATA3
TOB1	SLC9A3R1	0.0290761	undirected	TOB1	SLC9A3R1
TOB1	MAGED2	0.0203863	undirected	TOB1	MAGED2
VTCN1	KRT14	0.0232948	undirected	VTCN1	KRT14
VTCN1	KRT5	0.0232129	undirected	VTCN1	KRT5
AGR3	CCND1	0.0687619	undirected	AGR3	CCND1
AGR3	IGFBP4	0.091523	undirected	AGR3	IGFBP4
AGR3	TFF1	0.0866653	undirected	AGR3	TFF1
AGR3	CD63	0.0272481	undirected	AGR3	CD63
AGR3	CIB1	0.0361059	undirected	AGR3	CIB1
AGR3	GFRA1	0.162726	undirected	AGR3	GFRA1
AGR3	KRT18	0.0826673	undirected	AGR3	KRT18
AGR3	GAPDH	0.0294697	undirected	AGR3	GAPDH
AGR3	NAT1	0.176212	undirected	AGR3	NAT1
AGR3	LDHB	0.0979292	undirected	AGR3	LDHB
AGR3	PIP	0.0365868	undirected	AGR3	PIP
AGR3	RHOB	0.086395	undirected	AGR3	RHOB
AGR3	S100A2	0.0293619	undirected	AGR3	S100A2
AGR3	SCGB1D2	0.0298859	undirected	AGR3	SCGB1D2
AGR3	SLC40A1	0.0464425	undirected	AGR3	SLC40A1
AGR3	TMSB10	0.0316005	undirected	AGR3	TMSB10
AGR3	BTG2	0.0660097	undirected	AGR3	BTG2
AGR3	IGF1R	0.0797496	undirected	AGR3	IGF1R
AGR3	KRT19	0.0241789	undirected	AGR3	KRT19
AGR3	CRABP1	0.0639623	undirected	AGR3	CRABP1
AGR3	CSTB	0.0575463	undirected	AGR3	CSTB
AGR3	SLC39A6	0.133897	undirected	AGR3	SLC39A6
AGR3	AGR2	0.198952	undirected	AGR3	AGR2
AGR3	CST5	0.0423138	undirected	AGR3	CST5
AGR3	S100A8	0.0436171	undirected	AGR3	S100A8
AGR3	DHCR24	0.0257795	undirected	AGR3	DHCR24
AGR3	RAD54L	0.0288986	undirected	AGR3	RAD54L
AGR3	CA12	0.185377	undirected	AGR3	CA12
AGR3	FABP7	0.0595605	undirected	AGR3	FABP7
AGR3	PI3	0.0411338	undirected	AGR3	PI3
AGR3	S100A9	0.0364846	undirected	AGR3	S100A9
AGR3	TMEM123	0.0940683	undirected	AGR3	TMEM123
AGR3	EEF1A2	0.0265352	undirected	AGR3	EEF1A2
AGR3	ESR1	0.194622	undirected	AGR3	ESR1
AGR3	LY6D	0.0743836	undirected	AGR3	LY6D
AGR3	SUSD3	0.133657	undirected	AGR3	SUSD3
AGR3	TBC1D9	0.173853	undirected	AGR3	TBC1D9
AGR3	TSPAN13	0.137882	undirected	AGR3	TSPAN13
AGR3	GSTP1	0.0611614	undirected	AGR3	GSTP1
AGR3	PHGDH	0.0908394	undirected	AGR3	PHGDH
AGR3	STC2	0.0736553	undirected	AGR3	STC2
AGR3	TSG101	0.0541359	undirected	AGR3	TSG101
AGR3	YBX1	0.138005	undirected	AGR3	YBX1
AGR3	CHEK2	0.0401402	undirected	AGR3	CHEK2
AGR3	SLPI	0.0306994	undirected	AGR3	SLPI
AGR3	TUBB	0.029542	undirected	AGR3	TUBB
AGR3	LCN2	0.0271172	undirected	AGR3	LCN2
AGR3	SLC22A18	0.0369362	undirected	AGR3	SLC22A18
AGR3	IL6ST	0.156201	undirected	AGR3	IL6ST
AGR3	MRFAP1	0.0490032	undirected	AGR3	MRFAP1
AGR3	RPS19	0.0240602	undirected	AGR3	RPS19
AGR3	SCGB2A2	0.0351	undirected	AGR3	SCGB2A2
AGR3	CEACAM6	0.0302589	undirected	AGR3	CEACAM6
AGR3	CHI3L1	0.0359536	undirected	AGR3	CHI3L1
AGR3	GATA3	0.175423	undirected	AGR3	GATA3
AGR3	KRT8	0.0277064	undirected	AGR3	KRT8
AGR3	TSPAN1	0.14408	undirected	AGR3	TSPAN1
AGR3	COX6C	0.0401764	undirected	AGR3	COX6C
AGR3	PABPC1	0.0219093	undirected	AGR3	PABPC1
AGR3	PIGT	0.0463573	undirected	AGR3	PIGT
AGR3	SH3BGRL	0.0469995	undirected	AGR3	SH3BGRL
AGR3	SLC9A3R1	0.0437916	undirected	AGR3	SLC9A3R1
AGR3	CPB1	0.0604912	undirected	AGR3	CPB1
AGR3	GLUL	0.0572396	undirected	AGR3	GLUL
AGR3	KRT16	0.0881322	undirected	AGR3	KRT16
AGR3	MAGED2	0.115738	undirected	AGR3	MAGED2
AGR3	TCEAL4	0.0774264	undirected	AGR3	TCEAL4
CCND1	GFRA1	0.0305974	undirected	CCND1	GFRA1
CCND1	KRT18	0.0413291	undirected	CCND1	KRT18
CCND1	NAT1	0.0312827	undirected	CCND1	NAT1
CCND1	LDHB	0.0213734	undirected	CCND1	LDHB
CCND1	RHOB	0.0202673	undirected	CCND1	RHOB
CCND1	SLC39A6	0.0468889	undirected	CCND1	SLC39A6
CCND1	AGR2	0.0552446	undirected	CCND1	AGR2
CCND1	CA12	0.0726449	undirected	CCND1	CA12
CCND1	FABP7	0.0232062	undirected	CCND1	FABP7
CCND1	TMEM123	0.0304162	undirected	CCND1	TMEM123
CCND1	ESR1	0.0804421	undirected	CCND1	ESR1
CCND1	TBC1D9	0.0672797	undirected	CCND1	TBC1D9
CCND1	TSPAN13	0.031774	undirected	CCND1	TSPAN13
CCND1	GSTP1	0.0255676	undirected	CCND1	GSTP1
CCND1	YBX1	0.0293624	undirected	CCND1	YBX1
CCND1	IL6ST	0.0390777	undirected	CCND1	IL6ST
CCND1	GATA3	0.079764	undirected	CCND1	GATA3
CCND1	TSPAN1	0.0265178	undirected	CCND1	TSPAN1
CCND1	SLC9A3R1	0.0248708	undirected	CCND1	SLC9A3R1
CCND1	KRT16	0.0263687	undirected	CCND1	KRT16
CCND1	MAGED2	0.0538682	undirected	CCND1	MAGED2
FASN	KRT18	0.0308514	undirected	FASN	KRT18
FASN	KRT8	0.0207185	undirected	FASN	KRT8
FASN	SLC9A3R1	0.0322983	undirected	FASN	SLC9A3R1
IGFBP4	GFRA1	0.0324387	undirected	IGFBP4	GFRA1
IGFBP4	KRT18	0.024061	undirected	IGFBP4	KRT18
IGFBP4	NAT1	0.0488008	undirected	IGFBP4	NAT1
IGFBP4	RHOB	0.0202243	undirected	IGFBP4	RHOB
IGFBP4	IGF1R	0.0264295	undirected	IGFBP4	IGF1R
IGFBP4	SLC39A6	0.0349776	undirected	IGFBP4	SLC39A6
IGFBP4	AGR2	0.064645	undirected	IGFBP4	AGR2
IGFBP4	RAD54L	0.0272967	undirected	IGFBP4	RAD54L
IGFBP4	CA12	0.0791948	undirected	IGFBP4	CA12
IGFBP4	TMEM123	0.0203856	undirected	IGFBP4	TMEM123
IGFBP4	ESR1	0.0859981	undirected	IGFBP4	ESR1
IGFBP4	SUSD3	0.032179	undirected	IGFBP4	SUSD3
IGFBP4	TBC1D9	0.0854054	undirected	IGFBP4	TBC1D9
IGFBP4	TSPAN13	0.0265144	undirected	IGFBP4	TSPAN13
IGFBP4	STC2	0.0208244	undirected	IGFBP4	STC2
IGFBP4	YBX1	0.0272203	undirected	IGFBP4	YBX1
IGFBP4	IL6ST	0.04817	undirected	IGFBP4	IL6ST
IGFBP4	GATA3	0.0696167	undirected	IGFBP4	GATA3
IGFBP4	TSPAN1	0.0348006	undirected	IGFBP4	TSPAN1
IGFBP4	KRT16	0.0200997	undirected	IGFBP4	KRT16
IGFBP4	MAGED2	0.0430366	undirected	IGFBP4	MAGED2
IGKC	IGLV2-14	0.23682	undirected	IGKC	IGLV2-14
IGKC	IGKV1-5	0.452053	undirected	IGKC	IGKV1-5
IGKC	IGHM	0.349538	undirected	IGKC	IGHM
RPS6	CLTC	0.0262753	undirected	RPS6	CLTC
RPS6	RPS25	0.0588039	undirected	RPS6	RPS25
RPS6	RPS19	0.0224258	undirected	RPS6	RPS19
RPS6	SEPHS2	0.0255148	undirected	RPS6	SEPHS2
RPS6	YWHAB	0.0267693	undirected	RPS6	YWHAB
TFF1	GFRA1	0.0297069	undirected	TFF1	GFRA1
TFF1	KRT18	0.0367689	undirected	TFF1	KRT18
TFF1	NAT1	0.050445	undirected	TFF1	NAT1
TFF1	LDHB	0.0264721	undirected	TFF1	LDHB
TFF1	SLC39A6	0.0306231	undirected	TFF1	SLC39A6
TFF1	AGR2	0.0839102	undirected	TFF1	AGR2
TFF1	CA12	0.0656816	undirected	TFF1	CA12
TFF1	ESR1	0.0661209	undirected	TFF1	ESR1
TFF1	SUSD3	0.0224571	undirected	TFF1	SUSD3
TFF1	TBC1D9	0.0508473	undirected	TFF1	TBC1D9
TFF1	TSPAN13	0.0305738	undirected	TFF1	TSPAN13
TFF1	YBX1	0.0284751	undirected	TFF1	YBX1
TFF1	IL6ST	0.0282618	undirected	TFF1	IL6ST
TFF1	GATA3	0.0545275	undirected	TFF1	GATA3
TFF1	TSPAN1	0.0485811	undirected	TFF1	TSPAN1
TFF1	KRT16	0.0203625	undirected	TFF1	KRT16
TFF1	MAGED2	0.0266636	undirected	TFF1	MAGED2
CD63	AGR2	0.0308484	undirected	CD63	AGR2
CD63	CA12	0.0218658	undirected	CD63	CA12
CD63	TSPAN1	0.0294749	undirected	CD63	TSPAN1
CIB1	KRT18	0.0262734	undirected	CIB1	KRT18
CIB1	NAT1	0.0251908	undirected	CIB1	NAT1
CIB1	LDHB	0.0264472	undirected	CIB1	LDHB
CIB1	AGR2	0.0342557	undirected	CIB1	AGR2
CIB1	CA12	0.0415441	undirected	CIB1	CA12
CIB1	ESR1	0.0337464	undirected	CIB1	ESR1
CIB1	TBC1D9	0.0281791	undirected	CIB1	TBC1D9
CIB1	YBX1	0.0244935	undirected	CIB1	YBX1
CIB1	SLC22A18	0.0250613	undirected	CIB1	SLC22A18
CIB1	GATA3	0.033756	undirected	CIB1	GATA3
CIB1	TSPAN1	0.0326568	undirected	CIB1	TSPAN1
GFRA1	KRT18	0.0489114	undirected	GFRA1	KRT18
GFRA1	NAT1	0.0879048	undirected	GFRA1	NAT1
GFRA1	LDHB	0.038701	undirected	GFRA1	LDHB
GFRA1	RHOB	0.0341391	undirected	GFRA1	RHOB
GFRA1	IGF1R	0.0368726	undirected	GFRA1	IGF1R
GFRA1	CRABP1	0.0260653	undirected	GFRA1	CRABP1
GFRA1	CSTB	0.0219302	undirected	GFRA1	CSTB
GFRA1	SLC39A6	0.0648187	undirected	GFRA1	SLC39A6
GFRA1	AGR2	0.120464	undirected	GFRA1	AGR2
GFRA1	S100A8	0.0205056	undirected	GFRA1	S100A8
GFRA1	CA12	0.132767	undirected	GFRA1	CA12
GFRA1	FABP7	0.0292087	undirected	GFRA1	FABP7
GFRA1	PI3	0.0246584	undirected	GFRA1	PI3
GFRA1	TMEM123	0.0359456	undirected	GFRA1	TMEM123
GFRA1	ESR1	0.157353	undirected	GFRA1	ESR1
GFRA1	LY6D	0.0415456	undirected	GFRA1	LY6D
GFRA1	SUSD3	0.0532869	undirected	GFRA1	SUSD3
GFRA1	TBC1D9	0.121349	undirected	GFRA1	TBC1D9
GFRA1	TSPAN13	0.0597677	undirected	GFRA1	TSPAN13
GFRA1	GSTP1	0.028842	undirected	GFRA1	GSTP1
GFRA1	PHGDH	0.0331102	undirected	GFRA1	PHGDH
GFRA1	STC2	0.0308504	undirected	GFRA1	STC2
GFRA1	TSG101	0.0226075	undirected	GFRA1	TSG101
GFRA1	YBX1	0.0507291	undirected	GFRA1	YBX1
GFRA1	IL6ST	0.0719295	undirected	GFRA1	IL6ST
GFRA1	GATA3	0.125635	undirected	GFRA1	GATA3
GFRA1	TSPAN1	0.0507603	undirected	GFRA1	TSPAN1
GFRA1	COX6C	0.0222966	undirected	GFRA1	COX6C
GFRA1	PIGT	0.0208623	undirected	GFRA1	PIGT
GFRA1	SLC9A3R1	0.0228124	undirected	GFRA1	SLC9A3R1
GFRA1	CPB1	0.0209698	undirected	GFRA1	CPB1
GFRA1	KRT16	0.0546345	undirected	GFRA1	KRT16
GFRA1	MAGED2	0.06561	undirected	GFRA1	MAGED2
GFRA1	TCEAL4	0.0317368	undirected	GFRA1	TCEAL4
KRT18	NAT1	0.0476476	undirected	KRT18	NAT1
KRT18	LDHB	0.0676355	undirected	KRT18	LDHB
KRT18	RHOB	0.0681597	undirected	KRT18	RHOB
KRT18	IGF1R	0.020597	undirected	KRT18	IGF1R
KRT18	KRT19	0.0706994	undirected	KRT18	KRT19
KRT18	CRABP1	0.0287987	undirected	KRT18	CRABP1
KRT18	SLC39A6	0.0410031	undirected	KRT18	SLC39A6
KRT18	AGR2	0.0839902	undirected	KRT18	AGR2
KRT18	DHCR24	0.0395023	undirected	KRT18	DHCR24
KRT18	CA12	0.0868355	undirected	KRT18	CA12
KRT18	FABP7	0.0511246	undirected	KRT18	FABP7
KRT18	PI3	0.0257575	undirected	KRT18	PI3
KRT18	TMEM123	0.0340005	undirected	KRT18	TMEM123
KRT18	EEF1A2	0.0357625	undirected	KRT18	EEF1A2
KRT18	ESR1	0.0769958	undirected	KRT18	ESR1
KRT18	LY6D	0.0432627	undirected	KRT18	LY6D
KRT18	SUSD3	0.0275135	undirected	KRT18	SUSD3
KRT18	TBC1D9	0.0666999	undirected	KRT18	TBC1D9
KRT18	TSPAN13	0.0612401	undirected	KRT18	TSPAN13
KRT18	GSTP1	0.0386309	undirected	KRT18	GSTP1
KRT18	LASP1	0.0313484	undirected	KRT18	LASP1
KRT18	PHGDH	0.0366212	undirected	KRT18	PHGDH
KRT18	YBX1	0.0501937	undirected	KRT18	YBX1
KRT18	SLPI	0.0228055	undirected	KRT18	SLPI
KRT18	SLC22A18	0.0394946	undirected	KRT18	SLC22A18
KRT18	IL6ST	0.0375634	undirected	KRT18	IL6ST
KRT18	MRFAP1	0.0296676	undirected	KRT18	MRFAP1
KRT18	RPS19	0.0315935	undirected	KRT18	RPS19
KRT18	CEACAM6	0.0238301	undirected	KRT18	CEACAM6
KRT18	CHI3L1	0.0221868	undirected	KRT18	CHI3L1
KRT18	GATA3	0.0844758	undirected	KRT18	GATA3
KRT18	KRT8	0.258572	undirected	KRT18	KRT8
KRT18	TSPAN1	0.0770355	undirected	KRT18	TSPAN1
KRT18	ALDOA	0.0343451	undirected	KRT18	ALDOA
KRT18	COX6C	0.0263742	undirected	KRT18	COX6C
KRT18	PIGT	0.0338049	undirected	KRT18	PIGT
KRT18	SLC9A3R1	0.0732002	undirected	KRT18	SLC9A3R1
KRT18	KRT16	0.0394869	undirected	KRT18	KRT16
KRT18	MAGED2	0.0666139	undirected	KRT18	MAGED2
KRT18	SEPHS2	0.0318488	undirected	KRT18	SEPHS2
KRT18	TCEAL4	0.0202549	undirected	KRT18	TCEAL4
ACTG2	KLK5	0.195979	undirected	ACTG2	KLK5
ACTG2	S100A2	0.076136	undirected	ACTG2	S100A2
ACTG2	SAA1	0.0462589	undirected	ACTG2	SAA1
ACTG2	KRT14	0.275368	undirected	ACTG2	KRT14
ACTG2	FABP7	0.036382	undirected	ACTG2	FABP7
ACTG2	LY6D	0.0455253	undirected	ACTG2	LY6D
ACTG2	CD59	0.0325924	undirected	ACTG2	CD59
ACTG2	SLPI	0.0253424	undirected	ACTG2	SLPI
ACTG2	KRT5	0.229414	undirected	ACTG2	KRT5
ACTG2	CHI3L1	0.0273985	undirected	ACTG2	CHI3L1
ACTG2	MMP7	0.0415622	undirected	ACTG2	MMP7
ACTG2	OLFM4	0.0493604	undirected	ACTG2	OLFM4
ACTG2	KRT16	0.0705959	undirected	ACTG2	KRT16
GAPDH	BTG2	0.0263126	undirected	GAPDH	BTG2
GAPDH	RAD54L	0.0499484	undirected	GAPDH	RAD54L
GAPDH	ESR1	0.0297888	undirected	GAPDH	ESR1
GAPDH	TBC1D9	0.0294972	undirected	GAPDH	TBC1D9
GAPDH	TUBB	0.0326216	undirected	GAPDH	TUBB
KLK5	S100A2	0.13734	undirected	KLK5	S100A2
KLK5	SAA1	0.0575207	undirected	KLK5	SAA1
KLK5	KRT14	0.292754	undirected	KLK5	KRT14
KLK5	FABP7	0.0557056	undirected	KLK5	FABP7
KLK5	PI3	0.0356554	undirected	KLK5	PI3
KLK5	LY6D	0.0773891	undirected	KLK5	LY6D
KLK5	GSTP1	0.0271985	undirected	KLK5	GSTP1
KLK5	CD59	0.0477789	undirected	KLK5	CD59
KLK5	SLPI	0.0567127	undirected	KLK5	SLPI
KLK5	KRT5	0.270515	undirected	KLK5	KRT5
KLK5	LCN2	0.0336094	undirected	KLK5	LCN2
KLK5	CHI3L1	0.0568715	undirected	KLK5	CHI3L1
KLK5	GATA3	0.0228685	undirected	KLK5	GATA3
KLK5	MMP7	0.0705269	undirected	KLK5	MMP7
KLK5	OLFM4	0.0824385	undirected	KLK5	OLFM4
KLK5	KRT16	0.107238	undirected	KLK5	KRT16
KLK5	SEPHS2	0.0239754	undirected	KLK5	SEPHS2
NAT1	LDHB	0.065909	undirected	NAT1	LDHB
NAT1	PIP	0.0241968	undirected	NAT1	PIP
NAT1	RHOB	0.0493811	undirected	NAT1	RHOB
NAT1	SLC40A1	0.037089	undirected	NAT1	SLC40A1
NAT1	BTG2	0.0449666	undirected	NAT1	BTG2
NAT1	IGF1R	0.0364898	undirected	NAT1	IGF1R
NAT1	CRABP1	0.039135	undirected	NAT1	CRABP1
NAT1	CSTB	0.0259219	undirected	NAT1	CSTB
NAT1	SLC39A6	0.0749022	undirected	NAT1	SLC39A6
NAT1	AGR2	0.121207	undirected	NAT1	AGR2
NAT1	CST5	0.0210131	undirected	NAT1	CST5
NAT1	CA12	0.144015	undirected	NAT1	CA12
NAT1	FABP7	0.035916	undirected	NAT1	FABP7
NAT1	PI3	0.0221651	undirected	NAT1	PI3
NAT1	TMEM123	0.0409029	undirected	NAT1	TMEM123
NAT1	ESR1	0.164946	undirected	NAT1	ESR1
NAT1	LY6D	0.0426532	undirected	NAT1	LY6D
NAT1	SUSD3	0.0875509	undirected	NAT1	SUSD3
NAT1	TBC1D9	0.135139	undirected	NAT1	TBC1D9
NAT1	TSPAN13	0.0590116	undirected	NAT1	TSPAN13
NAT1	GSTP1	0.0284866	undirected	NAT1	GSTP1
NAT1	PHGDH	0.0485296	undirected	NAT1	PHGDH
NAT1	STC2	0.0353916	undirected	NAT1	STC2
NAT1	TSG101	0.0234001	undirected	NAT1	TSG101
NAT1	YBX1	0.0741609	undirected	NAT1	YBX1
NAT1	SLC22A18	0.0229667	undirected	NAT1	SLC22A18
NAT1	IL6ST	0.0918361	undirected	NAT1	IL6ST
NAT1	MRFAP1	0.0233918	undirected	NAT1	MRFAP1
NAT1	GATA3	0.135135	undirected	NAT1	GATA3
NAT1	TSPAN1	0.0799051	undirected	NAT1	TSPAN1
NAT1	COX6C	0.0203786	undirected	NAT1	COX6C
NAT1	PIGT	0.0249113	undirected	NAT1	PIGT
NAT1	SH3BGRL	0.0396111	undirected	NAT1	SH3BGRL
NAT1	SLC9A3R1	0.0222089	undirected	NAT1	SLC9A3R1
NAT1	CPB1	0.0289894	undirected	NAT1	CPB1
NAT1	GLUL	0.0537731	undirected	NAT1	GLUL
NAT1	KRT16	0.0470586	undirected	NAT1	KRT16
NAT1	MAGED2	0.0557174	undirected	NAT1	MAGED2
NAT1	TCEAL4	0.0423724	undirected	NAT1	TCEAL4
LDHB	RHOB	0.046798	undirected	LDHB	RHOB
LDHB	KRT19	0.0203867	undirected	LDHB	KRT19
LDHB	CRABP1	0.023261	undirected	LDHB	CRABP1
LDHB	SLC39A6	0.0371332	undirected	LDHB	SLC39A6
LDHB	AGR2	0.0871149	undirected	LDHB	AGR2
LDHB	DHCR24	0.0231694	undirected	LDHB	DHCR24
LDHB	CA12	0.0966773	undirected	LDHB	CA12
LDHB	FABP7	0.0374507	undirected	LDHB	FABP7
LDHB	PI3	0.0201238	undirected	LDHB	PI3
LDHB	TMEM123	0.0257392	undirected	LDHB	TMEM123
LDHB	EEF1A2	0.0203131	undirected	LDHB	EEF1A2
LDHB	ESR1	0.0949294	undirected	LDHB	ESR1
LDHB	LY6D	0.0419537	undirected	LDHB	LY6D
LDHB	SUSD3	0.0274305	undirected	LDHB	SUSD3
LDHB	TBC1D9	0.0782618	undirected	LDHB	TBC1D9
LDHB	TSPAN13	0.0416318	undirected	LDHB	TSPAN13
LDHB	GSTP1	0.0250114	undirected	LDHB	GSTP1
LDHB	PHGDH	0.0333206	undirected	LDHB	PHGDH
LDHB	YBX1	0.0540334	undirected	LDHB	YBX1
LDHB	KRT5	0.0250675	undirected	LDHB	KRT5
LDHB	SLC22A18	0.0277008	undirected	LDHB	SLC22A18
LDHB	IL6ST	0.0430783	undirected	LDHB	IL6ST
LDHB	GATA3	0.104166	undirected	LDHB	GATA3
LDHB	KRT8	0.0314805	undirected	LDHB	KRT8
LDHB	TSPAN1	0.0513795	undirected	LDHB	TSPAN1
LDHB	PIGT	0.0250938	undirected	LDHB	PIGT
LDHB	SLC9A3R1	0.0289504	undirected	LDHB	SLC9A3R1
LDHB	KRT16	0.0454657	undirected	LDHB	KRT16
LDHB	MAGED2	0.049366	undirected	LDHB	MAGED2
PIP	SCGB1D2	0.0280956	undirected	PIP	SCGB1D2
PIP	AGR2	0.0386968	undirected	PIP	AGR2
PIP	RAD54L	0.0248783	undirected	PIP	RAD54L
PIP	CA12	0.031386	undirected	PIP	CA12
PIP	ESR1	0.0284724	undirected	PIP	ESR1
PIP	TBC1D9	0.022736	undirected	PIP	TBC1D9
PIP	SCGB2A2	0.0356855	undirected	PIP	SCGB2A2
PIP	GATA3	0.0243962	undirected	PIP	GATA3
PIP	TSPAN1	0.0248	undirected	PIP	TSPAN1
RHOB	SLC39A6	0.0311352	undirected	RHOB	SLC39A6
RHOB	AGR2	0.0792076	undirected	RHOB	AGR2
RHOB	CA12	0.092285	undirected	RHOB	CA12
RHOB	FABP7	0.0307745	undirected	RHOB	FABP7
RHOB	TMEM123	0.0244089	undirected	RHOB	TMEM123
RHOB	ESR1	0.0841818	undirected	RHOB	ESR1
RHOB	LY6D	0.0348573	undirected	RHOB	LY6D
RHOB	TBC1D9	0.0715391	undirected	RHOB	TBC1D9
RHOB	TSPAN13	0.0374367	undirected	RHOB	TSPAN13
RHOB	PHGDH	0.0235152	undirected	RHOB	PHGDH
RHOB	YBX1	0.03943	undirected	RHOB	YBX1
RHOB	IL6ST	0.0345578	undirected	RHOB	IL6ST
RHOB	GATA3	0.0934341	undirected	RHOB	GATA3
RHOB	KRT8	0.0342922	undirected	RHOB	KRT8
RHOB	TSPAN1	0.0521114	undirected	RHOB	TSPAN1
RHOB	SLC9A3R1	0.0267426	undirected	RHOB	SLC9A3R1
RHOB	KRT16	0.0392008	undirected	RHOB	KRT16
RHOB	MAGED2	0.0532831	undirected	RHOB	MAGED2
S100A4	S100A10	0.0257224	undirected	S100A4	S100A10
S100A4	S100A6	0.0438844	undirected	S100A4	S100A6
TUFM	ALDOA	0.0929535	undirected	TUFM	ALDOA
TUFM	SEPHS2	0.0385396	undirected	TUFM	SEPHS2
S100A2	SAA1	0.0217446	undirected	S100A2	SAA1
S100A2	KRT14	0.164717	undirected	S100A2	KRT14
S100A2	AGR2	0.0248986	undirected	S100A2	AGR2
S100A2	CA12	0.0277814	undirected	S100A2	CA12
S100A2	FABP7	0.0334981	undirected	S100A2	FABP7
S100A2	PI3	0.024106	undirected	S100A2	PI3
S100A2	ESR1	0.0360219	undirected	S100A2	ESR1
S100A2	LY6D	0.0752135	undirected	S100A2	LY6D
S100A2	TBC1D9	0.0316207	undirected	S100A2	TBC1D9
S100A2	CD59	0.0225533	undirected	S100A2	CD59
S100A2	SLPI	0.0290953	undirected	S100A2	SLPI
S100A2	KRT5	0.168882	undirected	S100A2	KRT5
S100A2	LCN2	0.0251296	undirected	S100A2	LCN2
S100A2	S100A6	0.020037	undirected	S100A2	S100A6
S100A2	CHI3L1	0.0304024	undirected	S100A2	CHI3L1
S100A2	GATA3	0.0374155	undirected	S100A2	GATA3
S100A2	MMP7	0.0369718	undirected	S100A2	MMP7
S100A2	OLFM4	0.0287081	undirected	S100A2	OLFM4
S100A2	KRT16	0.113689	undirected	S100A2	KRT16
S100A2	MAGED2	0.0204673	undirected	S100A2	MAGED2
SAA1	KRT14	0.0960295	undirected	SAA1	KRT14
SAA1	FABP7	0.0261453	undirected	SAA1	FABP7
SAA1	LY6D	0.0218682	undirected	SAA1	LY6D
SAA1	KRT5	0.095099	undirected	SAA1	KRT5
SAA1	CHI3L1	0.0256908	undirected	SAA1	CHI3L1
SAA1	MMP7	0.0552889	undirected	SAA1	MMP7
SAA1	OLFM4	0.0264097	undirected	SAA1	OLFM4
SAA1	KRT16	0.0281637	undirected	SAA1	KRT16
SCGB1D2	AGR2	0.0248727	undirected	SCGB1D2	AGR2
SCGB1D2	SCGB2A2	0.422949	undirected	SCGB1D2	SCGB2A2
SLC40A1	AGR2	0.040674	undirected	SLC40A1	AGR2
SLC40A1	RAD54L	0.0299137	undirected	SLC40A1	RAD54L
SLC40A1	CA12	0.0400744	undirected	SLC40A1	CA12
SLC40A1	ESR1	0.036006	undirected	SLC40A1	ESR1
SLC40A1	SUSD3	0.0225745	undirected	SLC40A1	SUSD3
SLC40A1	TBC1D9	0.0304574	undirected	SLC40A1	TBC1D9
SLC40A1	IL6ST	0.026633	undirected	SLC40A1	IL6ST
SLC40A1	GATA3	0.0287311	undirected	SLC40A1	GATA3
TMSB10	SLC39A6	0.0251548	undirected	TMSB10	SLC39A6
TMSB10	S100A8	0.0470949	undirected	TMSB10	S100A8
TMSB10	CA12	0.0269973	undirected	TMSB10	CA12
TMSB10	S100A9	0.0423061	undirected	TMSB10	S100A9
TMSB10	ESR1	0.0414352	undirected	TMSB10	ESR1
TMSB10	TBC1D9	0.0381362	undirected	TMSB10	TBC1D9
TMSB10	STC2	0.0217536	undirected	TMSB10	STC2
TMSB10	IL6ST	0.025733	undirected	TMSB10	IL6ST
TMSB10	S100A11	0.0331733	undirected	TMSB10	S100A11
TMSB10	GATA3	0.0264688	undirected	TMSB10	GATA3
BTG2	SLC39A6	0.0218264	undirected	BTG2	SLC39A6
BTG2	AGR2	0.0410568	undirected	BTG2	AGR2
BTG2	RAD54L	0.0432395	undirected	BTG2	RAD54L
BTG2	CA12	0.0482637	undirected	BTG2	CA12
BTG2	ESR1	0.0624507	undirected	BTG2	ESR1
BTG2	SUSD3	0.0251235	undirected	BTG2	SUSD3
BTG2	TBC1D9	0.0583171	undirected	BTG2	TBC1D9
BTG2	YBX1	0.0214349	undirected	BTG2	YBX1
BTG2	IL6ST	0.0394382	undirected	BTG2	IL6ST
BTG2	GATA3	0.0473759	undirected	BTG2	GATA3
CALR	RAD54L	0.0208588	undirected	CALR	RAD54L
CLTC	RPS25	0.0314746	undirected	CLTC	RPS25
CLTC	SLC9A3R1	0.0503685	undirected	CLTC	SLC9A3R1
IGF1R	SLC39A6	0.0510775	undirected	IGF1R	SLC39A6
IGF1R	AGR2	0.0497212	undirected	IGF1R	AGR2
IGF1R	S100A8	0.0243261	undirected	IGF1R	S100A8
IGF1R	CA12	0.0708035	undirected	IGF1R	CA12
IGF1R	S100A9	0.0219905	undirected	IGF1R	S100A9
IGF1R	TMEM123	0.0286727	undirected	IGF1R	TMEM123
IGF1R	ESR1	0.0909768	undirected	IGF1R	ESR1
IGF1R	SUSD3	0.0282014	undirected	IGF1R	SUSD3
IGF1R	TBC1D9	0.0789204	undirected	IGF1R	TBC1D9
IGF1R	TSPAN13	0.0255652	undirected	IGF1R	TSPAN13
IGF1R	GSTP1	0.021054	undirected	IGF1R	GSTP1
IGF1R	STC2	0.0232096	undirected	IGF1R	STC2
IGF1R	YBX1	0.0266919	undirected	IGF1R	YBX1
IGF1R	IL6ST	0.0400778	undirected	IGF1R	IL6ST
IGF1R	GATA3	0.0660818	undirected	IGF1R	GATA3
IGF1R	TSPAN1	0.0209032	undirected	IGF1R	TSPAN1
IGF1R	KRT16	0.0228715	undirected	IGF1R	KRT16
IGF1R	MAGED2	0.0379291	undirected	IGF1R	MAGED2
KRT19	AGR2	0.0239543	undirected	KRT19	AGR2
KRT19	CA12	0.0318871	undirected	KRT19	CA12
KRT19	ESR1	0.0255475	undirected	KRT19	ESR1
KRT19	TBC1D9	0.0225408	undirected	KRT19	TBC1D9
KRT19	GATA3	0.031558	undirected	KRT19	GATA3
KRT19	KRT8	0.0538585	undirected	KRT19	KRT8
KRT19	SLC9A3R1	0.0364847	undirected	KRT19	SLC9A3R1
KRT19	MAGED2	0.0292465	undirected	KRT19	MAGED2
KRT7	KRT14	0.0216026	undirected	KRT7	KRT14
KRT7	TMEM123	0.020939	undirected	KRT7	TMEM123
KRT7	ESR1	0.0240499	undirected	KRT7	ESR1
KRT7	TBC1D9	0.0203289	undirected	KRT7	TBC1D9
KRT7	KRT5	0.0226894	undirected	KRT7	KRT5
KRT7	KRT16	0.0275272	undirected	KRT7	KRT16
XRCC2	RAD54L	0.112683	undirected	XRCC2	RAD54L
XRCC2	CHEK2	0.0580413	undirected	XRCC2	CHEK2
XRCC2	TUBB	0.0306701	undirected	XRCC2	TUBB
NDUFS5	TBC1D9	0.0206822	undirected	NDUFS5	TBC1D9
CRABP1	SLC39A6	0.0294332	undirected	CRABP1	SLC39A6
CRABP1	AGR2	0.0564259	undirected	CRABP1	AGR2
CRABP1	CA12	0.0564013	undirected	CRABP1	CA12
CRABP1	TMEM123	0.0210108	undirected	CRABP1	TMEM123
CRABP1	ESR1	0.0625723	undirected	CRABP1	ESR1
CRABP1	LY6D	0.0325852	undirected	CRABP1	LY6D
CRABP1	TBC1D9	0.0652622	undirected	CRABP1	TBC1D9
CRABP1	TSPAN13	0.038016	undirected	CRABP1	TSPAN13
CRABP1	PHGDH	0.0233794	undirected	CRABP1	PHGDH
CRABP1	YBX1	0.0260217	undirected	CRABP1	YBX1
CRABP1	IL6ST	0.0324569	undirected	CRABP1	IL6ST
CRABP1	GATA3	0.0550344	undirected	CRABP1	GATA3
CRABP1	TSPAN1	0.0350229	undirected	CRABP1	TSPAN1
CRABP1	KRT16	0.0337669	undirected	CRABP1	KRT16
CRABP1	MAGED2	0.0420295	undirected	CRABP1	MAGED2
CSTB	SLC39A6	0.021028	undirected	CSTB	SLC39A6
CSTB	AGR2	0.0428269	undirected	CSTB	AGR2
CSTB	S100A8	0.0324842	undirected	CSTB	S100A8
CSTB	CA12	0.0441407	undirected	CSTB	CA12
CSTB	S100A9	0.0277648	undirected	CSTB	S100A9
CSTB	ESR1	0.0532259	undirected	CSTB	ESR1
CSTB	TBC1D9	0.0539053	undirected	CSTB	TBC1D9
CSTB	TSPAN13	0.0212396	undirected	CSTB	TSPAN13
CSTB	IL6ST	0.0237959	undirected	CSTB	IL6ST
CSTB	GATA3	0.0431298	undirected	CSTB	GATA3
CSTB	KRT16	0.0231657	undirected	CSTB	KRT16
CSTB	MAGED2	0.0266896	undirected	CSTB	MAGED2
IGLV2-14	IGKV1-5	0.196503	undirected	IGLV2-14	IGKV1-5
IGLV2-14	IGHM	0.227682	undirected	IGLV2-14	IGHM
KRT14	FABP7	0.0708698	undirected	KRT14	FABP7
KRT14	PI3	0.0388034	undirected	KRT14	PI3
KRT14	LY6D	0.083745	undirected	KRT14	LY6D
KRT14	GSTP1	0.0280356	undirected	KRT14	GSTP1
KRT14	CD59	0.0630959	undirected	KRT14	CD59
KRT14	SLPI	0.0617731	undirected	KRT14	SLPI
KRT14	KRT5	0.33352	undirected	KRT14	KRT5
KRT14	LCN2	0.0320999	undirected	KRT14	LCN2
KRT14	CHI3L1	0.0583257	undirected	KRT14	CHI3L1
KRT14	MMP7	0.0940088	undirected	KRT14	MMP7
KRT14	OLFM4	0.119379	undirected	KRT14	OLFM4
KRT14	KRT16	0.105096	undirected	KRT14	KRT16
KRT14	SEPHS2	0.0330629	undirected	KRT14	SEPHS2
SLC39A6	AGR2	0.0918113	undirected	SLC39A6	AGR2
SLC39A6	CST5	0.0329573	undirected	SLC39A6	CST5
SLC39A6	S100A8	0.0288218	undirected	SLC39A6	S100A8
SLC39A6	CA12	0.113505	undirected	SLC39A6	CA12
SLC39A6	FABP7	0.027622	undirected	SLC39A6	FABP7
SLC39A6	PI3	0.0205053	undirected	SLC39A6	PI3
SLC39A6	S100A9	0.0267646	undirected	SLC39A6	S100A9
SLC39A6	TMEM123	0.0489705	undirected	SLC39A6	TMEM123
SLC39A6	ESR1	0.146315	undirected	SLC39A6	ESR1
SLC39A6	LY6D	0.0347257	undirected	SLC39A6	LY6D
SLC39A6	SUSD3	0.0486564	undirected	SLC39A6	SUSD3
SLC39A6	TBC1D9	0.13503	undirected	SLC39A6	TBC1D9
SLC39A6	TSPAN13	0.0592768	undirected	SLC39A6	TSPAN13
SLC39A6	GSTP1	0.0370216	undirected	SLC39A6	GSTP1
SLC39A6	PHGDH	0.0354215	undirected	SLC39A6	PHGDH
SLC39A6	STC2	0.0289583	undirected	SLC39A6	STC2
SLC39A6	TSG101	0.0363276	undirected	SLC39A6	TSG101
SLC39A6	YBX1	0.0587135	undirected	SLC39A6	YBX1
SLC39A6	IL6ST	0.0712901	undirected	SLC39A6	IL6ST
SLC39A6	MRFAP1	0.0367884	undirected	SLC39A6	MRFAP1
SLC39A6	CHI3L1	0.0213917	undirected	SLC39A6	CHI3L1
SLC39A6	GATA3	0.115236	undirected	SLC39A6	GATA3
SLC39A6	TSPAN1	0.0455456	undirected	SLC39A6	TSPAN1
SLC39A6	COX6C	0.0615487	undirected	SLC39A6	COX6C
SLC39A6	PIGT	0.0354583	undirected	SLC39A6	PIGT
SLC39A6	SLC9A3R1	0.0293741	undirected	SLC39A6	SLC9A3R1
SLC39A6	CPB1	0.028711	undirected	SLC39A6	CPB1
SLC39A6	GLUL	0.0230718	undirected	SLC39A6	GLUL
SLC39A6	KRT16	0.0465519	undirected	SLC39A6	KRT16
SLC39A6	MAGED2	0.0624964	undirected	SLC39A6	MAGED2
SLC39A6	TCEAL4	0.0312913	undirected	SLC39A6	TCEAL4
AGR2	CST5	0.0271807	undirected	AGR2	CST5
AGR2	S100A8	0.0256231	undirected	AGR2	S100A8
AGR2	DHCR24	0.0276733	undirected	AGR2	DHCR24
AGR2	CA12	0.158089	undirected	AGR2	CA12
AGR2	FABP7	0.0503467	undirected	AGR2	FABP7
AGR2	PI3	0.0296011	undirected	AGR2	PI3
AGR2	TMEM123	0.0663667	undirected	AGR2	TMEM123
AGR2	EEF1A2	0.0249441	undirected	AGR2	EEF1A2
AGR2	ESR1	0.16708	undirected	AGR2	ESR1
AGR2	LY6D	0.0649603	undirected	AGR2	LY6D
AGR2	NQO1	0.0205178	undirected	AGR2	NQO1
AGR2	SUSD3	0.0807539	undirected	AGR2	SUSD3
AGR2	TBC1D9	0.141012	undirected	AGR2	TBC1D9
AGR2	TSPAN13	0.149617	undirected	AGR2	TSPAN13
AGR2	GSTP1	0.0462409	undirected	AGR2	GSTP1
AGR2	PHGDH	0.0647301	undirected	AGR2	PHGDH
AGR2	STC2	0.0458578	undirected	AGR2	STC2
AGR2	TSG101	0.0372442	undirected	AGR2	TSG101
AGR2	YBX1	0.102621	undirected	AGR2	YBX1
AGR2	CHEK2	0.0294158	undirected	AGR2	CHEK2
AGR2	SLPI	0.0221706	undirected	AGR2	SLPI
AGR2	SLC22A18	0.0362655	undirected	AGR2	SLC22A18
AGR2	IL6ST	0.10309	undirected	AGR2	IL6ST
AGR2	MRFAP1	0.0376862	undirected	AGR2	MRFAP1
AGR2	RPS19	0.0231298	undirected	AGR2	RPS19
AGR2	SCGB2A2	0.0305174	undirected	AGR2	SCGB2A2
AGR2	CEACAM6	0.0360552	undirected	AGR2	CEACAM6
AGR2	CHI3L1	0.0303009	undirected	AGR2	CHI3L1
AGR2	GATA3	0.1431	undirected	AGR2	GATA3
AGR2	KRT8	0.0388689	undirected	AGR2	KRT8
AGR2	TSPAN1	0.138762	undirected	AGR2	TSPAN1
AGR2	COX6C	0.0269802	undirected	AGR2	COX6C
AGR2	PIGT	0.0408417	undirected	AGR2	PIGT
AGR2	SH3BGRL	0.0328637	undirected	AGR2	SH3BGRL
AGR2	SLC9A3R1	0.0432209	undirected	AGR2	SLC9A3R1
AGR2	CPB1	0.0387553	undirected	AGR2	CPB1
AGR2	GLUL	0.0364632	undirected	AGR2	GLUL
AGR2	KRT16	0.0734507	undirected	AGR2	KRT16
AGR2	MAGED2	0.096958	undirected	AGR2	MAGED2
AGR2	TCEAL4	0.0536929	undirected	AGR2	TCEAL4
CST5	CA12	0.0354526	undirected	CST5	CA12
CST5	ESR1	0.0488606	undirected	CST5	ESR1
CST5	TBC1D9	0.0430397	undirected	CST5	TBC1D9
CST5	YBX1	0.0294421	undirected	CST5	YBX1
CST5	IL6ST	0.0276506	undirected	CST5	IL6ST
CST5	GATA3	0.0358515	undirected	CST5	GATA3
CST5	MAGED2	0.0275226	undirected	CST5	MAGED2
RPS25	SLC9A3R1	0.0200723	undirected	RPS25	SLC9A3R1
S100A8	CA12	0.0320475	undirected	S100A8	CA12
S100A8	PI3	0.0316702	undirected	S100A8	PI3
S100A8	S100A9	0.355076	undirected	S100A8	S100A9
S100A8	TMEM123	0.0255299	undirected	S100A8	TMEM123
S100A8	ESR1	0.0504881	undirected	S100A8	ESR1
S100A8	TBC1D9	0.0438375	undirected	S100A8	TBC1D9
S100A8	STC2	0.021538	undirected	S100A8	STC2
S100A8	TSG101	0.0258909	undirected	S100A8	TSG101
S100A8	SLPI	0.0236898	undirected	S100A8	SLPI
S100A8	LCN2	0.0422403	undirected	S100A8	LCN2
S100A8	IL6ST	0.0291386	undirected	S100A8	IL6ST
S100A8	S100A11	0.0350391	undirected	S100A8	S100A11
S100A8	CHI3L1	0.0274509	undirected	S100A8	CHI3L1
S100A8	GATA3	0.035554	undirected	S100A8	GATA3
S100A8	KRT16	0.0240573	undirected	S100A8	KRT16
S100A8	MAGED2	0.0281154	undirected	S100A8	MAGED2
DHCR24	CA12	0.0322388	undirected	DHCR24	CA12
DHCR24	ESR1	0.0276212	undirected	DHCR24	ESR1
DHCR24	TBC1D9	0.0245165	undirected	DHCR24	TBC1D9
DHCR24	GATA3	0.0315811	undirected	DHCR24	GATA3
DHCR24	SLC9A3R1	0.0209619	undirected	DHCR24	SLC9A3R1
DHCR24	MAGED2	0.027281	undirected	DHCR24	MAGED2
RAD54L	CA12	0.0225838	undirected	RAD54L	CA12
RAD54L	CCT6A	0.0385837	undirected	RAD54L	CCT6A
RAD54L	ESR1	0.0269389	undirected	RAD54L	ESR1
RAD54L	TBC1D9	0.028457	undirected	RAD54L	TBC1D9
RAD54L	CHEK2	0.095602	undirected	RAD54L	CHEK2
RAD54L	TUBB	0.0890208	undirected	RAD54L	TUBB
RAD54L	PTMA	0.0238444	undirected	RAD54L	PTMA
RAD54L	CPB1	0.0234671	undirected	RAD54L	CPB1
CA12	FABP7	0.0589435	undirected	CA12	FABP7
CA12	PI3	0.0348662	undirected	CA12	PI3
CA12	S100A9	0.0261372	undirected	CA12	S100A9
CA12	TMEM123	0.0796849	undirected	CA12	TMEM123
CA12	EEF1A2	0.0288364	undirected	CA12	EEF1A2
CA12	ESR1	0.181813	undirected	CA12	ESR1
CA12	LY6D	0.0647573	undirected	CA12	LY6D
CA12	SUSD3	0.123968	undirected	CA12	SUSD3
CA12	TBC1D9	0.150444	undirected	CA12	TBC1D9
CA12	TSPAN13	0.10359	undirected	CA12	TSPAN13
CA12	GSTP1	0.0618582	undirected	CA12	GSTP1
CA12	PHGDH	0.0828096	undirected	CA12	PHGDH
CA12	STC2	0.0723263	undirected	CA12	STC2
CA12	TSG101	0.0418773	undirected	CA12	TSG101
CA12	YBX1	0.122201	undirected	CA12	YBX1
CA12	CHEK2	0.034801	undirected	CA12	CHEK2
CA12	SLPI	0.0272514	undirected	CA12	SLPI
CA12	TUBB	0.0215207	undirected	CA12	TUBB
CA12	LCN2	0.0221906	undirected	CA12	LCN2
CA12	SLC22A18	0.0387816	undirected	CA12	SLC22A18
CA12	IL6ST	0.138731	undirected	CA12	IL6ST
CA12	MRFAP1	0.0425711	undirected	CA12	MRFAP1
CA12	RPS19	0.0246458	undirected	CA12	RPS19
CA12	SCGB2A2	0.0247583	undirected	CA12	SCGB2A2
CA12	CEACAM6	0.0239264	undirected	CA12	CEACAM6
CA12	CHI3L1	0.0318108	undirected	CA12	CHI3L1
CA12	GATA3	0.157639	undirected	CA12	GATA3
CA12	KRT8	0.04162	undirected	CA12	KRT8
CA12	TSPAN1	0.127713	undirected	CA12	TSPAN1
CA12	COX6C	0.0384877	undirected	CA12	COX6C
CA12	PIGT	0.0401944	undirected	CA12	PIGT
CA12	SH3BGRL	0.0404913	undirected	CA12	SH3BGRL
CA12	SLC9A3R1	0.0475648	undirected	CA12	SLC9A3R1
CA12	CPB1	0.0447016	undirected	CA12	CPB1
CA12	GLUL	0.0524507	undirected	CA12	GLUL
CA12	KRT16	0.0770135	undirected	CA12	KRT16
CA12	MAGED2	0.106031	undirected	CA12	MAGED2
CA12	TCEAL4	0.0634347	undirected	CA12	TCEAL4
FABP7	PI3	0.0392414	undirected	FABP7	PI3
FABP7	TMEM123	0.0284612	undirected	FABP7	TMEM123
FABP7	EEF1A2	0.0208537	undirected	FABP7	EEF1A2
FABP7	ESR1	0.0638477	undirected	FABP7	ESR1
FABP7	LY6D	0.0523897	undirected	FABP7	LY6D
FABP7	TBC1D9	0.0520981	undirected	FABP7	TBC1D9
FABP7	TSPAN13	0.0310318	undirected	FABP7	TSPAN13
FABP7	GSTP1	0.0317554	undirected	FABP7	GSTP1
FABP7	PHGDH	0.0242009	undirected	FABP7	PHGDH
FABP7	YBX1	0.0294558	undirected	FABP7	YBX1
FABP7	CD59	0.0242609	undirected	FABP7	CD59
FABP7	SLPI	0.0450785	undirected	FABP7	SLPI
FABP7	KRT5	0.0820478	undirected	FABP7	KRT5
FABP7	LCN2	0.0216086	undirected	FABP7	LCN2
FABP7	SLC22A18	0.0208894	undirected	FABP7	SLC22A18
FABP7	IL6ST	0.0260106	undirected	FABP7	IL6ST
FABP7	CHI3L1	0.0333733	undirected	FABP7	CHI3L1
FABP7	GATA3	0.0687521	undirected	FABP7	GATA3
FABP7	KRT8	0.0248902	undirected	FABP7	KRT8
FABP7	MMP7	0.0309461	undirected	FABP7	MMP7
FABP7	TSPAN1	0.0295257	undirected	FABP7	TSPAN1
FABP7	COX6C	0.0244498	undirected	FABP7	COX6C
FABP7	OLFM4	0.0389116	undirected	FABP7	OLFM4
FABP7	PIGT	0.0227297	undirected	FABP7	PIGT
FABP7	SLC9A3R1	0.0241432	undirected	FABP7	SLC9A3R1
FABP7	KRT16	0.0650106	undirected	FABP7	KRT16
FABP7	MAGED2	0.0393881	undirected	FABP7	MAGED2
IGKV1-5	IGHM	0.355571	undirected	IGKV1-5	IGHM
PI3	S100A9	0.0303337	undirected	PI3	S100A9
PI3	ESR1	0.0433754	undirected	PI3	ESR1
PI3	LY6D	0.0608989	undirected	PI3	LY6D
PI3	TBC1D9	0.0360368	undirected	PI3	TBC1D9
PI3	TSPAN13	0.020172	undirected	PI3	TSPAN13
PI3	GSTP1	0.0201804	undirected	PI3	GSTP1
PI3	SLPI	0.0875104	undirected	PI3	SLPI
PI3	KRT5	0.048734	undirected	PI3	KRT5
PI3	LCN2	0.0352195	undirected	PI3	LCN2
PI3	GATA3	0.0432199	undirected	PI3	GATA3
PI3	KRT16	0.0519226	undirected	PI3	KRT16
PI3	MAGED2	0.0250298	undirected	PI3	MAGED2
S100A9	TMEM123	0.0255965	undirected	S100A9	TMEM123
S100A9	ESR1	0.0440366	undirected	S100A9	ESR1
S100A9	TBC1D9	0.0382689	undirected	S100A9	TBC1D9
S100A9	TSG101	0.025172	undirected	S100A9	TSG101
S100A9	SLPI	0.0244658	undirected	S100A9	SLPI
S100A9	LCN2	0.0437696	undirected	S100A9	LCN2
S100A9	IL6ST	0.0251144	undirected	S100A9	IL6ST
S100A9	S100A11	0.0336071	undirected	S100A9	S100A11
S100A9	CHI3L1	0.0309934	undirected	S100A9	CHI3L1
S100A9	GATA3	0.0309018	undirected	S100A9	GATA3
S100A9	KRT16	0.0242173	undirected	S100A9	KRT16
S100A9	MAGED2	0.0266277	undirected	S100A9	MAGED2
TMEM123	EEF1A2	0.0227546	undirected	TMEM123	EEF1A2
TMEM123	ESR1	0.110575	undirected	TMEM123	ESR1
TMEM123	LY6D	0.0314023	undirected	TMEM123	LY6D
TMEM123	SUSD3	0.0220541	undirected	TMEM123	SUSD3
TMEM123	TBC1D9	0.102924	undirected	TMEM123	TBC1D9
TMEM123	TSPAN13	0.0342687	undirected	TMEM123	TSPAN13
TMEM123	GSTP1	0.0427828	undirected	TMEM123	GSTP1
TMEM123	PHGDH	0.0385958	undirected	TMEM123	PHGDH
TMEM123	YBX1	0.0455034	undirected	TMEM123	YBX1
TMEM123	SLPI	0.0251192	undirected	TMEM123	SLPI
TMEM123	LCN2	0.0219861	undirected	TMEM123	LCN2
TMEM123	IL6ST	0.0407131	undirected	TMEM123	IL6ST
TMEM123	CHI3L1	0.0233281	undirected	TMEM123	CHI3L1
TMEM123	GATA3	0.0978615	undirected	TMEM123	GATA3
TMEM123	TSPAN1	0.0314824	undirected	TMEM123	TSPAN1
TMEM123	COX6C	0.0339566	undirected	TMEM123	COX6C
TMEM123	SLC9A3R1	0.0225446	undirected	TMEM123	SLC9A3R1
TMEM123	CPB1	0.0200741	undirected	TMEM123	CPB1
TMEM123	KRT16	0.0515339	undirected	TMEM123	KRT16
TMEM123	MAGED2	0.0561704	undirected	TMEM123	MAGED2
EEF1A2	ESR1	0.0306907	undirected	EEF1A2	ESR1
EEF1A2	TBC1D9	0.0292429	undirected	EEF1A2	TBC1D9
EEF1A2	GSTP1	0.0217762	undirected	EEF1A2	GSTP1
EEF1A2	SLC22A18	0.0200576	undirected	EEF1A2	SLC22A18
EEF1A2	GATA3	0.0346446	undirected	EEF1A2	GATA3
EEF1A2	SLC9A3R1	0.0233417	undirected	EEF1A2	SLC9A3R1
EEF1A2	MAGED2	0.0294063	undirected	EEF1A2	MAGED2
ESR1	LY6D	0.0773901	undirected	ESR1	LY6D
ESR1	SUSD3	0.141197	undirected	ESR1	SUSD3
ESR1	TBC1D9	0.182563	undirected	ESR1	TBC1D9
ESR1	TSPAN13	0.114369	undirected	ESR1	TSPAN13
ESR1	GSTP1	0.0744244	undirected	ESR1	GSTP1
ESR1	PHGDH	0.100365	undirected	ESR1	PHGDH
ESR1	STC2	0.0902966	undirected	ESR1	STC2
ESR1	TSG101	0.0611247	undirected	ESR1	TSG101
ESR1	YBX1	0.146016	undirected	ESR1	YBX1
ESR1	CHEK2	0.0386181	undirected	ESR1	CHEK2
ESR1	EXOC2	0.0209707	undirected	ESR1	EXOC2
ESR1	SLPI	0.0370601	undirected	ESR1	SLPI
ESR1	TUBB	0.0299658	undirected	ESR1	TUBB
ESR1	LCN2	0.0349824	undirected	ESR1	LCN2
ESR1	SLC22A18	0.0371644	undirected	ESR1	SLC22A18
ESR1	IL6ST	0.167609	undirected	ESR1	IL6ST
ESR1	MRFAP1	0.0527188	undirected	ESR1	MRFAP1
ESR1	RPS19	0.0255062	undirected	ESR1	RPS19
ESR1	SCGB2A2	0.0206495	undirected	ESR1	SCGB2A2
ESR1	CEACAM6	0.0215404	undirected	ESR1	CEACAM6
ESR1	CHI3L1	0.0425765	undirected	ESR1	CHI3L1
ESR1	GATA3	0.185673	undirected	ESR1	GATA3
ESR1	KRT8	0.0244506	undirected	ESR1	KRT8
ESR1	TSPAN1	0.120479	undirected	ESR1	TSPAN1
ESR1	COX6C	0.0475017	undirected	ESR1	COX6C
ESR1	PABPC1	0.0208967	undirected	ESR1	PABPC1
ESR1	PIGT	0.0480268	undirected	ESR1	PIGT
ESR1	SH3BGRL	0.0436558	undirected	ESR1	SH3BGRL
ESR1	SLC9A3R1	0.0468046	undirected	ESR1	SLC9A3R1
ESR1	CPB1	0.062542	undirected	ESR1	CPB1
ESR1	GLUL	0.0576839	undirected	ESR1	GLUL
ESR1	KRT16	0.0935447	undirected	ESR1	KRT16
ESR1	MAGED2	0.118779	undirected	ESR1	MAGED2
ESR1	TCEAL4	0.0844761	undirected	ESR1	TCEAL4
LY6D	SUSD3	0.0204049	undirected	LY6D	SUSD3
LY6D	TBC1D9	0.0654918	undirected	LY6D	TBC1D9
LY6D	TSPAN13	0.0448234	undirected	LY6D	TSPAN13
LY6D	GSTP1	0.0349551	undirected	LY6D	GSTP1
LY6D	PHGDH	0.0280255	undirected	LY6D	PHGDH
LY6D	YBX1	0.0339582	undirected	LY6D	YBX1
LY6D	CD59	0.0274735	undirected	LY6D	CD59
LY6D	SLPI	0.0497564	undirected	LY6D	SLPI
LY6D	KRT5	0.0953776	undirected	LY6D	KRT5
LY6D	LCN2	0.0348443	undirected	LY6D	LCN2
LY6D	IL6ST	0.0313093	undirected	LY6D	IL6ST
LY6D	CHI3L1	0.0396175	undirected	LY6D	CHI3L1
LY6D	GATA3	0.0738177	undirected	LY6D	GATA3
LY6D	MMP7	0.0346702	undirected	LY6D	MMP7
LY6D	TSPAN1	0.031205	undirected	LY6D	TSPAN1
LY6D	COX6C	0.0227497	undirected	LY6D	COX6C
LY6D	OLFM4	0.0337739	undirected	LY6D	OLFM4
LY6D	PIGT	0.0307746	undirected	LY6D	PIGT
LY6D	SLC9A3R1	0.0239599	undirected	LY6D	SLC9A3R1
LY6D	KRT16	0.102614	undirected	LY6D	KRT16
LY6D	MAGED2	0.0423001	undirected	LY6D	MAGED2
S100A10	S100A6	0.0418164	undirected	S100A10	S100A6
S100A10	S100A11	0.0218193	undirected	S100A10	S100A11
S100A10	KRT16	0.0258845	undirected	S100A10	KRT16
SUSD3	TBC1D9	0.100707	undirected	SUSD3	TBC1D9
SUSD3	TSPAN13	0.0288887	undirected	SUSD3	TSPAN13
SUSD3	PHGDH	0.0290294	undirected	SUSD3	PHGDH
SUSD3	STC2	0.0504903	undirected	SUSD3	STC2
SUSD3	YBX1	0.0480398	undirected	SUSD3	YBX1
SUSD3	IL6ST	0.100876	undirected	SUSD3	IL6ST
SUSD3	GATA3	0.0975224	undirected	SUSD3	GATA3
SUSD3	TSPAN1	0.0355525	undirected	SUSD3	TSPAN1
SUSD3	GLUL	0.0317855	undirected	SUSD3	GLUL
SUSD3	KRT16	0.0290187	undirected	SUSD3	KRT16
SUSD3	MAGED2	0.0417145	undirected	SUSD3	MAGED2
SUSD3	TCEAL4	0.0229264	undirected	SUSD3	TCEAL4
TBC1D9	TSPAN13	0.109824	undirected	TBC1D9	TSPAN13
TBC1D9	GSTP1	0.0644539	undirected	TBC1D9	GSTP1
TBC1D9	PHGDH	0.0895377	undirected	TBC1D9	PHGDH
TBC1D9	STC2	0.070217	undirected	TBC1D9	STC2
TBC1D9	TSG101	0.0644511	undirected	TBC1D9	TSG101
TBC1D9	YBX1	0.119537	undirected	TBC1D9	YBX1
TBC1D9	CHEK2	0.0437375	undirected	TBC1D9	CHEK2
TBC1D9	SLPI	0.0316199	undirected	TBC1D9	SLPI
TBC1D9	TUBB	0.0275384	undirected	TBC1D9	TUBB
TBC1D9	LCN2	0.030625	undirected	TBC1D9	LCN2
TBC1D9	SLC22A18	0.0309004	undirected	TBC1D9	SLC22A18
TBC1D9	IL6ST	0.139581	undirected	TBC1D9	IL6ST
TBC1D9	MRFAP1	0.0726049	undirected	TBC1D9	MRFAP1
TBC1D9	RPS19	0.0296058	undirected	TBC1D9	RPS19
TBC1D9	CEACAM6	0.0205086	undirected	TBC1D9	CEACAM6
TBC1D9	CHI3L1	0.0389723	undirected	TBC1D9	CHI3L1
TBC1D9	GATA3	0.157695	undirected	TBC1D9	GATA3
TBC1D9	TSPAN1	0.110036	undirected	TBC1D9	TSPAN1
TBC1D9	COX6C	0.0420154	undirected	TBC1D9	COX6C
TBC1D9	PABPC1	0.0217245	undirected	TBC1D9	PABPC1
TBC1D9	PIGT	0.0440237	undirected	TBC1D9	PIGT
TBC1D9	SH3BGRL	0.039334	undirected	TBC1D9	SH3BGRL
TBC1D9	SLC9A3R1	0.0452824	undirected	TBC1D9	SLC9A3R1
TBC1D9	CPB1	0.0640892	undirected	TBC1D9	CPB1
TBC1D9	GLUL	0.041751	undirected	TBC1D9	GLUL
TBC1D9	KRT16	0.0808825	undirected	TBC1D9	KRT16
TBC1D9	MAGED2	0.117326	undirected	TBC1D9	MAGED2
TBC1D9	TCEAL4	0.0688553	undirected	TBC1D9	TCEAL4
TSPAN13	GSTP1	0.0293709	undirected	TSPAN13	GSTP1
TSPAN13	PHGDH	0.0288607	undirected	TSPAN13	PHGDH
TSPAN13	TSG101	0.0348501	undirected	TSPAN13	TSG101
TSPAN13	YBX1	0.0435419	undirected	TSPAN13	YBX1
TSPAN13	IL6ST	0.047864	undirected	TSPAN13	IL6ST
TSPAN13	MRFAP1	0.0352948	undirected	TSPAN13	MRFAP1
TSPAN13	RPS19	0.0223143	undirected	TSPAN13	RPS19
TSPAN13	CHI3L1	0.022533	undirected	TSPAN13	CHI3L1
TSPAN13	GATA3	0.0997607	undirected	TSPAN13	GATA3
TSPAN13	KRT8	0.0234904	undirected	TSPAN13	KRT8
TSPAN13	TSPAN1	0.0599885	undirected	TSPAN13	TSPAN1
TSPAN13	PIGT	0.0434635	undirected	TSPAN13	PIGT
TSPAN13	SLC9A3R1	0.0397611	undirected	TSPAN13	SLC9A3R1
TSPAN13	KRT16	0.0559574	undirected	TSPAN13	KRT16
TSPAN13	MAGED2	0.0728758	undirected	TSPAN13	MAGED2
TSPAN13	TCEAL4	0.0288007	undirected	TSPAN13	TCEAL4
GSTP1	PHGDH	0.0255064	undirected	GSTP1	PHGDH
GSTP1	YBX1	0.0309929	undirected	GSTP1	YBX1
GSTP1	SLPI	0.0306824	undirected	GSTP1	SLPI
GSTP1	KRT5	0.0339822	undirected	GSTP1	KRT5
GSTP1	IL6ST	0.027599	undirected	GSTP1	IL6ST
GSTP1	CHI3L1	0.021144	undirected	GSTP1	CHI3L1
GSTP1	GATA3	0.0715147	undirected	GSTP1	GATA3
GSTP1	TSPAN1	0.0220954	undirected	GSTP1	TSPAN1
GSTP1	COX6C	0.0417927	undirected	GSTP1	COX6C
GSTP1	SLC9A3R1	0.0291963	undirected	GSTP1	SLC9A3R1
GSTP1	KRT16	0.0468803	undirected	GSTP1	KRT16
GSTP1	MAGED2	0.0374754	undirected	GSTP1	MAGED2
LASP1	RPS19	0.0215588	undirected	LASP1	RPS19
LASP1	SLC9A3R1	0.0268596	undirected	LASP1	SLC9A3R1
LASP1	MAGED2	0.0233158	undirected	LASP1	MAGED2
PHGDH	YBX1	0.0452689	undirected	PHGDH	YBX1
PHGDH	IL6ST	0.0512819	undirected	PHGDH	IL6ST
PHGDH	GATA3	0.0974628	undirected	PHGDH	GATA3
PHGDH	TSPAN1	0.0329014	undirected	PHGDH	TSPAN1
PHGDH	KRT16	0.0421178	undirected	PHGDH	KRT16
PHGDH	MAGED2	0.0394908	undirected	PHGDH	MAGED2
STC2	YBX1	0.0266596	undirected	STC2	YBX1
STC2	IL6ST	0.0603687	undirected	STC2	IL6ST
STC2	GATA3	0.0619573	undirected	STC2	GATA3
STC2	MAGED2	0.0344299	undirected	STC2	MAGED2
STC2	TCEAL4	0.0417047	undirected	STC2	TCEAL4
TSG101	IL6ST	0.0305541	undirected	TSG101	IL6ST
TSG101	GATA3	0.0478477	undirected	TSG101	GATA3
TSG101	KRT16	0.0228241	undirected	TSG101	KRT16
TSG101	MAGED2	0.0337002	undirected	TSG101	MAGED2
YBX1	SLC22A18	0.0392192	undirected	YBX1	SLC22A18
YBX1	IL6ST	0.0657707	undirected	YBX1	IL6ST
YBX1	CHI3L1	0.0239119	undirected	YBX1	CHI3L1
YBX1	GATA3	0.123486	undirected	YBX1	GATA3
YBX1	TSPAN1	0.054761	undirected	YBX1	TSPAN1
YBX1	COX6C	0.0238278	undirected	YBX1	COX6C
YBX1	PIGT	0.0221571	undirected	YBX1	PIGT
YBX1	SLC9A3R1	0.0207822	undirected	YBX1	SLC9A3R1
YBX1	CPB1	0.0215069	undirected	YBX1	CPB1
YBX1	GLUL	0.0263618	undirected	YBX1	GLUL
YBX1	KRT16	0.0483261	undirected	YBX1	KRT16
YBX1	MAGED2	0.0597453	undirected	YBX1	MAGED2
YBX1	TCEAL4	0.0272344	undirected	YBX1	TCEAL4
CD59	KRT5	0.0628635	undirected	CD59	KRT5
CD59	KRT16	0.0403203	undirected	CD59	KRT16
CHEK2	TUBB	0.0246698	undirected	CHEK2	TUBB
CHEK2	IL6ST	0.0230299	undirected	CHEK2	IL6ST
CHEK2	GATA3	0.0326772	undirected	CHEK2	GATA3
SLPI	KRT5	0.0663066	undirected	SLPI	KRT5
SLPI	LCN2	0.0843973	undirected	SLPI	LCN2
SLPI	CHI3L1	0.0220759	undirected	SLPI	CHI3L1
SLPI	GATA3	0.0394341	undirected	SLPI	GATA3
SLPI	COX6C	0.0265313	undirected	SLPI	COX6C
SLPI	OLFM4	0.0308044	undirected	SLPI	OLFM4
SLPI	KRT16	0.0535967	undirected	SLPI	KRT16
SLPI	MAGED2	0.0220155	undirected	SLPI	MAGED2
KRT5	LCN2	0.0339281	undirected	KRT5	LCN2
KRT5	CHI3L1	0.0668236	undirected	KRT5	CHI3L1
KRT5	GATA3	0.0200012	undirected	KRT5	GATA3
KRT5	MMP7	0.108377	undirected	KRT5	MMP7
KRT5	COX6C	0.0239407	undirected	KRT5	COX6C
KRT5	OLFM4	0.129309	undirected	KRT5	OLFM4
KRT5	SLC9A3R1	0.0204364	undirected	KRT5	SLC9A3R1
KRT5	KRT16	0.110223	undirected	KRT5	KRT16
KRT5	SEPHS2	0.0325544	undirected	KRT5	SEPHS2
LCN2	GATA3	0.0309855	undirected	LCN2	GATA3
LCN2	KRT16	0.0453441	undirected	LCN2	KRT16
S100A6	KRT16	0.0278641	undirected	S100A6	KRT16
SLC22A18	GATA3	0.0385371	undirected	SLC22A18	GATA3
SLC22A18	TSPAN1	0.0289168	undirected	SLC22A18	TSPAN1
SLC22A18	ALDOA	0.0260121	undirected	SLC22A18	ALDOA
SLC22A18	MAGED2	0.026726	undirected	SLC22A18	MAGED2
IL6ST	MRFAP1	0.0265202	undirected	IL6ST	MRFAP1
IL6ST	GATA3	0.130576	undirected	IL6ST	GATA3
IL6ST	TSPAN1	0.052193	undirected	IL6ST	TSPAN1
IL6ST	PIGT	0.0228649	undirected	IL6ST	PIGT
IL6ST	SH3BGRL	0.0245183	undirected	IL6ST	SH3BGRL
IL6ST	CPB1	0.0266445	undirected	IL6ST	CPB1
IL6ST	GLUL	0.032764	undirected	IL6ST	GLUL
IL6ST	KRT16	0.0412826	undirected	IL6ST	KRT16
IL6ST	MAGED2	0.0628036	undirected	IL6ST	MAGED2
IL6ST	TCEAL4	0.0418002	undirected	IL6ST	TCEAL4
MRFAP1	RPS19	0.0212507	undirected	MRFAP1	RPS19
MRFAP1	GATA3	0.0432061	undirected	MRFAP1	GATA3
MRFAP1	TSPAN1	0.0213543	undirected	MRFAP1	TSPAN1
MRFAP1	SLC9A3R1	0.0232719	undirected	MRFAP1	SLC9A3R1
MRFAP1	MAGED2	0.0501573	undirected	MRFAP1	MAGED2
RPS19	GATA3	0.0259392	undirected	RPS19	GATA3
RPS19	SLC9A3R1	0.0200976	undirected	RPS19	SLC9A3R1
RPS19	MAGED2	0.0303207	undirected	RPS19	MAGED2
CEACAM6	GATA3	0.0224992	undirected	CEACAM6	GATA3
CEACAM6	TSPAN1	0.0455389	undirected	CEACAM6	TSPAN1
CEACAM6	FXYD3	0.0289799	undirected	CEACAM6	FXYD3
CHI3L1	GATA3	0.0404693	undirected	CHI3L1	GATA3
CHI3L1	MMP7	0.0438727	undirected	CHI3L1	MMP7
CHI3L1	KRT16	0.058595	undirected	CHI3L1	KRT16
CHI3L1	MAGED2	0.0262349	undirected	CHI3L1	MAGED2
GATA3	KRT8	0.0389114	undirected	GATA3	KRT8
GATA3	TSPAN1	0.113883	undirected	GATA3	TSPAN1
GATA3	COX6C	0.0450999	undirected	GATA3	COX6C
GATA3	PIGT	0.0437909	undirected	GATA3	PIGT
GATA3	SH3BGRL	0.0320492	undirected	GATA3	SH3BGRL
GATA3	SLC9A3R1	0.0526793	undirected	GATA3	SLC9A3R1
GATA3	CPB1	0.0468985	undirected	GATA3	CPB1
GATA3	GLUL	0.0410755	undirected	GATA3	GLUL
GATA3	KRT16	0.0898972	undirected	GATA3	KRT16
GATA3	MAGED2	0.110596	undirected	GATA3	MAGED2
GATA3	TCEAL4	0.066501	undirected	GATA3	TCEAL4
KRT8	TSPAN1	0.036171	undirected	KRT8	TSPAN1
KRT8	ALDOA	0.022518	undirected	KRT8	ALDOA
KRT8	SLC9A3R1	0.0515548	undirected	KRT8	SLC9A3R1
KRT8	MAGED2	0.0350973	undirected	KRT8	MAGED2
MMP7	OLFM4	0.0258685	undirected	MMP7	OLFM4
MMP7	KRT16	0.0430514	undirected	MMP7	KRT16
TSPAN1	PIGT	0.0232139	undirected	TSPAN1	PIGT
TSPAN1	SLC9A3R1	0.028863	undirected	TSPAN1	SLC9A3R1
TSPAN1	CPB1	0.0222809	undirected	TSPAN1	CPB1
TSPAN1	KRT16	0.0409724	undirected	TSPAN1	KRT16
TSPAN1	MAGED2	0.0621269	undirected	TSPAN1	MAGED2
TSPAN1	TCEAL4	0.023034	undirected	TSPAN1	TCEAL4
ALDOA	SLC9A3R1	0.0200932	undirected	ALDOA	SLC9A3R1
ALDOA	SEPHS2	0.024289	undirected	ALDOA	SEPHS2
COX6C	SLC9A3R1	0.0239696	undirected	COX6C	SLC9A3R1
COX6C	KRT16	0.031035	undirected	COX6C	KRT16
COX6C	MAGED2	0.0281458	undirected	COX6C	MAGED2
OLFM4	KRT16	0.0348872	undirected	OLFM4	KRT16
PIGT	SLC9A3R1	0.0246852	undirected	PIGT	SLC9A3R1
PIGT	KRT16	0.0332341	undirected	PIGT	KRT16
PIGT	MAGED2	0.0421899	undirected	PIGT	MAGED2
PIGT	YWHAB	0.0348915	undirected	PIGT	YWHAB
SLC9A3R1	KRT16	0.0306028	undirected	SLC9A3R1	KRT16
SLC9A3R1	MAGED2	0.0423884	undirected	SLC9A3R1	MAGED2
SLC9A3R1	SEPHS2	0.0349904	undirected	SLC9A3R1	SEPHS2
CPB1	MAGED2	0.0223584	undirected	CPB1	MAGED2
KRT16	MAGED2	0.0486593	undirected	KRT16	MAGED2
KRT16	SEPHS2	0.0203724	undirected	KRT16	SEPHS2
KRT16	TCEAL4	0.0202231	undirected	KRT16	TCEAL4
MAGED2	TCEAL4	0.0376358	undirected	MAGED2	TCEAL4
