# Supplementary material for: Comparative Analysis of Gene Correlation Networks of Breast Cancer Patients Based on Mutations in TP53
Source: Biomolecules. 2022 Jul 13;12(7):979. doi: 10.3390/biom12070979 (PMC9313229; doi:10.3390/biom12070979)
Supplement: Supplementary file 1 [file biomolecules-12-00979-s001.zip › Supplementary Materials S8.xlsx]

## Sheet: wtTP53_r0
gene_pair	group1	group2	p_value	fdr	gene_pair_hazard	gene_pair_p_value
AHR_SUSD2	26	420	2.21866e-18	9.49851e-14	9.66833	1.12644e-07
ERBB2_ITGB3BP	18	428	6.16716e-06	0.00813036	9.24976	6.64752e-05
CLDN7_MAPK10	13	433	6.96007e-07	0.00186234	8.91613	6.19429e-05
CDH3_FGFR2	12	434	2.70164e-05	0.0210015	8.65226	5.23199e-05
PTGS2_SUSD2	19	427	4.43673e-09	6.33151e-05	8.27575	3.08667e-06
GLI1_PTENP1	28	418	5.02945e-07	0.00153801	5.5052	2.09924e-05
CDH3_GLI1	28	418	4.71504e-07	0.00153801	5.47096	5.49149e-06
DNMT3B_PTPRG-AS1	20	426	1.49736e-08	0.00012821	4.84674	9.24252e-05
KLLN_LINC00511	36	410	1.55824e-06	0.00290049	4.3771	1.7388e-05
BMP6_ERBB2	41	405	3.82501e-05	0.0240818	4.36029	8.64621e-05
S100A4_SUSD2	27	419	4.33e-06	0.00686578	4.26647	5.21199e-05
ANKRD30A_NQO1	78	368	5.059e-06	0.00721953	4.07977	5.33026e-06
BEX2_GLI1	45	401	6.79802e-07	0.00186234	4.03271	7.94905e-05
CLCA2_SCGB2A2	54	392	4.56082e-07	0.00153801	3.99962	9.28918e-05
CLCA2_PTHLH	48	398	7.86495e-05	0.0350744	3.91532	4.92627e-05
CLCA2_GSN	203	243	1.4804e-05	0.0136433	3.81788	2.35068e-05
LINC01234_SP1	73	373	1.85676e-05	0.0152869	3.76563	1.66691e-05
AMPH_IL2	55	391	1.69122e-05	0.0143564	3.69847	3.09627e-05
DRAIC_FHIT	130	316	8.97253e-06	0.0103819	3.62089	5.14517e-06
EREG_SUSD2	57	389	6.45689e-06	0.00813036	3.43231	5.72835e-05
AKIP1_SUSD2	72	374	3.27189e-07	0.00153801	3.3912	6.60451e-05
CTNNB1_PTN	88	358	1.50792e-07	0.000922244	3.37217	2.3415e-05
CTTN_DNMT3B	97	349	9.89929e-05	0.0381103	3.27468	3.13564e-05
FHIT_SP1	96	350	2.09297e-05	0.0169065	3.27212	3.91227e-05
FOSL1_TGFBR1	163	283	5.72067e-06	0.00790043	3.15971	9.24005e-05
MMP13_RAD51	415	31	4.55452e-05	0.0274631	0.22534	7.26606e-05
AURKA_MMP13	428	18	2.79615e-05	0.0210015	0.168732	7.13156e-05
CCNB2_MMP13	421	25	1.49779e-05	0.0136433	0.148358	7.64341e-06

## Sheet: wtTP53_r1
gene_pair	group1	group2	p_value	fdr	gene_pair_hazard	gene_pair_p_value
MAPK10_PTK6	20	426	4.54565e-08	0.000194731	9.11874	1.23629e-06
CDH3_FGFR2	13	433	3.85731e-05	0.0181586	8.18784	8.42472e-05
CLDN7_MAPK10	16	430	4.37767e-06	0.0050912	7.97137	2.25373e-05
AHR_SUSD2	26	420	5.55813e-09	5.95262e-05	7.62543	8.05075e-07
PTGS2_SUSD2	19	427	1.55814e-08	8.64202e-05	7.51033	9.39842e-06
IGKV1-5_ST14	13	433	1.30296e-08	8.64202e-05	6.9262	6.92449e-05
LSINCT5_SUSD2	13	433	1.3839e-05	0.0104008	6.69623	7.94499e-05
GLI1_RMST	13	433	1.11039e-06	0.00237841	6.19942	3.28208e-05
CDH3_GLI1	28	418	7.55904e-10	1.61911e-05	6.07799	1.68722e-07
DNMT3B_PTPRG-AS1	18	428	1.61386e-08	8.64202e-05	5.38682	6.72585e-05
GREB1_TOX3	21	425	5.00452e-07	0.00166192	5.28589	8.57317e-05
CDKN1A_IL6	42	404	2.68734e-06	0.00374635	5.27339	1.68192e-05
GLI1_PTENP1	29	417	2.30277e-06	0.00374601	5.19507	3.95758e-05
TOX3_YBX1	23	423	2.64734e-05	0.0154357	5.18973	7.74028e-05
BEX2_GLI1	44	402	1.55657e-08	8.64202e-05	5.04853	2.23554e-06
CDKN1A_HBEGF	24	422	2.85188e-05	0.0162896	4.97943	8.83593e-05
ERBB3_RRAS2	30	416	2.53587e-06	0.00374601	4.63536	4.56044e-05
AXIN2_CCNG1	43	403	1.04929e-06	0.00236582	4.27093	1.05397e-05
CLCA2_PTHLH	47	399	1.03838e-05	0.00839304	4.20416	9.76662e-06
CLCA2_SCGB2A2	56	390	3.9713e-07	0.00154661	4.09674	3.38713e-05
LINC00511_SRC	75	371	4.87112e-05	0.0202596	4.08798	6.83146e-06
KCNK15-AS1_PLAU	52	394	6.52873e-05	0.0243204	4.08073	4.43957e-06
LINC01234_SP1	73	373	0.000112135	0.0348098	3.64381	2.47283e-05
AMPH_IL2	57	389	5.01595e-05	0.0206614	3.56352	4.95704e-05
CDH3_LSINCT5	51	395	1.68499e-05	0.0120306	3.52312	5.87354e-05
EREG_SUSD2	54	392	2.20331e-05	0.0143011	3.47201	3.67404e-05
DRAIC_FHIT	132	314	6.00081e-05	0.0238026	3.45797	7.18857e-06
MIR2052HG_SCGB2A2	54	392	5.91512e-06	0.00618044	3.44176	7.51948e-05
LINC01234_TGFBR2	58	388	1.90956e-05	0.0131942	3.42386	9.40965e-05
CLCA2_GSN	202	244	4.55165e-05	0.0194988	3.41913	2.63591e-05
PRKCA_SUSD2	53	393	1.80101e-06	0.00321472	3.37267	4.72955e-05
RARB_TYMP	62	384	6.861e-06	0.00664806	3.34441	2.48687e-05
MST1R_TGFBR2	88	358	0.000113444	0.0348394	3.33335	2.04368e-05
CSK_HOXA-AS2	60	386	0.000120854	0.0358019	3.2858	7.89881e-05
AKIP1_SUSD2	73	373	4.39726e-06	0.0050912	3.27902	8.08508e-05
H19_PGR	81	365	6.30085e-05	0.0243204	3.24994	4.85845e-05
KRT14_TNFSF11	76	370	2.30649e-05	0.0145306	3.0301	5.37313e-05
AKT2_PTENP1	133	313	0.000153619	0.0405447	3.02412	4.19426e-05
CDKN1A_FGF2	184	262	3.64635e-05	0.0181056	2.96449	9.67678e-05
MMP11_MMP13	432	14	7.83193e-12	3.35512e-07	0.0608379	9.25134e-08

## Sheet: wtTP53_r2
gene_pair	group1	group2	p_value	fdr	gene_pair_hazard	gene_pair_p_value
GLI1_RMST	12	434	3.53253e-10	3.78016e-06	9.25751	5.08428e-07
CLDN7_MAPK10	15	431	2.47996e-06	0.00461532	9.05754	6.952e-06
CDH3_GLI1	29	417	4.54157e-15	1.94397e-10	8.63409	1.62044e-09
MAPK10_PTK6	21	425	2.06945e-07	0.000738174	8.41017	2.7652e-06
PTGS2_SUSD2	18	428	4.40853e-08	0.000209669	7.29493	8.76932e-06
AHR_SUSD2	27	419	3.70383e-09	3.17078e-05	6.14489	1.68141e-06
GREB1_TOX3	21	425	7.11686e-07	0.00179194	5.20328	7.99082e-05
BEX2_GLI1	43	403	3.49383e-10	3.78016e-06	5.17403	8.03556e-07
GLI1_PTENP1	30	416	1.40515e-05	0.0131822	4.65089	9.92337e-05
MIR2052HG_SCGB2A2	54	392	3.20882e-07	0.000915669	4.37504	1.85173e-06
LINC00511_SRC	76	370	9.70352e-05	0.0370848	3.86203	7.2414e-06
AMPH_IL2	55	391	2.08642e-06	0.00425271	3.8158	1.02994e-05
KCNK15-AS1_PLAU	54	392	9.09001e-05	0.035053	3.78123	9.39495e-06
DRAIC_FHIT	138	308	0.000109573	0.0400868	3.63351	2.19754e-06
MAPK10_YBX1	43	403	5.48977e-06	0.00712074	3.62882	8.01047e-05
ANKRD30A_NQO1	84	362	1.55907e-05	0.0133469	3.60168	1.04172e-05
FHIT_SP1	100	346	5.1922e-05	0.0271033	3.59223	4.63856e-06
AXIN2_CCNG1	42	404	9.85142e-05	0.0373168	3.47438	6.78624e-05
LINC01234_SP1	71	375	2.62331e-05	0.0168313	3.43934	2.7228e-05
FASN_GLI1	51	395	4.30661e-08	0.000209669	3.4294	6.97799e-05
GLI1_LSINCT5	53	393	3.13379e-07	0.000915669	3.37206	8.37568e-05
AKT1_PTENP1	50	396	2.3179e-06	0.0045098	3.33944	4.78064e-05
EGOT_LINC00511	78	368	5.15003e-05	0.0271033	3.19079	4.1359e-05
H19_PGR	74	372	2.14532e-05	0.0161252	3.15834	3.86778e-05
KDM5B_KLLN	180	266	2.54553e-05	0.0168313	3.08794	3.15614e-05
CLCA2_GSN	206	240	6.37152e-05	0.0300584	3.02924	8.27678e-05
CTTN_DNMT3B	96	350	5.01674e-05	0.0268902	2.95737	4.84186e-05
FOSL1_TGFBR1	162	284	3.85998e-06	0.0060415	2.9538	5.18676e-05
DRAIC_GPER1	117	329	1.49177e-05	0.0133029	2.781	8.01247e-05
BRMS1L_STXBP5-AS1	267	179	2.45503e-05	0.0168313	0.353811	8.82683e-05
CCNB2_MMP13	422	24	0.000163583	0.0476328	0.191545	7.64841e-05

## Sheet: mTP53_r0
gene_pair	group1	group2	gene_pair_hazard	gene_pair_p_value	CI_lower	CI_upper	age_hazard	age_p_value
KDM5B_ST14	16	212	7.02674	1.52652e-05	2.90412	17.0017	1.03942	0.00608031
ESRRA_LINC01405	18	210	6.99406	6.6346e-05	2.68956	18.1877	1.0369	0.00860809
ITGB3BP_SP1	34	194	5.13667	8.75878e-05	2.2677	11.6353	1.04989	0.00121133
ITGB3BP_SP1	34	194	5.13667	8.75878e-05	2.2677	11.6353	1.04989	0.00121133
PIK3CA_PRLR	30	198	5.06703	2.23256e-05	2.3933	10.7278	1.03151	0.0179615
PBOV1_TWIST1	39	189	4.70438	6.01092e-05	2.208	10.0232	1.03661	0.011166
EPCAM_SERPINE1	26	202	4.45048	8.02436e-05	2.11912	9.34669	1.0342	0.0107198
PELP1_PRLR	42	186	4.39178	8.81187e-05	2.09615	9.2015	1.03317	0.0169459
CASP9_ITGB3BP	51	177	4.37215	6.68931e-05	2.11711	9.02918	1.04459	0.00171618

## Sheet: mTP53_r1
gene_pair	group1	group2	gene_pair_hazard	gene_pair_p_value	CI_lower	CI_upper	age_hazard	age_p_value
KIT_RHOBTB2	20	208	7.90563	3.10235e-06	3.3158	18.8488	1.04964	0.000975288
ESRRA_LINC01405	17	211	7.74351	3.13729e-05	2.95425	20.2968	1.04148	0.00375085
ITGB3BP_SP1	30	198	5.99677	4.29189e-05	2.54238	14.1447	1.0558	0.000546783
PBOV1_TWIST1	44	184	5.03043	2.73357e-05	2.36469	10.7013	1.04017	0.00566909
PIK3CA_PRLR	31	197	5.00762	2.91729e-05	2.3527	10.6585	1.03607	0.00848701
BCAS3_SP1	55	173	4.71177	8.22483e-05	2.17829	10.1918	1.04794	0.00117695

## Sheet: mTP53_r2
gene_pair	group1	group2	gene_pair_hazard	gene_pair_p_value	CI_lower	CI_upper	age_hazard	age_p_value
ESRRA_LINC01405	18	210	8.30091	2.12293e-05	3.12903	22.0213	1.03969	0.00606593
KDM5B_ST14	15	213	8.2804	3.80665e-06	3.37849	20.2946	1.04326	0.00381716
PBOV1_TWIST1	43	185	5.33038	1.48869e-05	2.49931	11.3683	1.03861	0.00934748
PIK3CA_PRLR	30	198	5.30629	1.51404e-05	2.4915	11.3011	1.03597	0.00925398
EPCAM_SERPINE1	24	204	5.23432	1.55925e-05	2.47018	11.0916	1.03842	0.00714289
CASP9_ITGB3BP	46	182	5.03555	1.74396e-05	2.40827	10.529	1.0489	0.00119442
PELP1_PRLR	43	185	4.49601	8.35206e-05	2.12611	9.50752	1.03685	0.0103327
