# Supplementary material for: Comparative Analysis of Gene Correlation Networks of Breast Cancer Patients Based on Mutations in TP53
Source: Biomolecules. 2022 Jul 13;12(7):979. doi: 10.3390/biom12070979 (PMC9313229; doi:10.3390/biom12070979)
Supplement: Supplementary file 1 [file biomolecules-12-00979-s001.zip › Supplementary Materials S9.xlsx]

## Sheet: BMC_Cancer_wtTP53_scc
gene_pair	group1	group2	p_value	fdr	gene_pair_hazard	gene_pair_p_value
MSH2_PAK1	19	477	2.52305e-06	0.0110919	7.18115	6.74719e-05
XBP1_ZNF703	34	462	2.1339e-05	0.0273078	4.68852	1.35828e-05
CDH3_KRT14	48	448	8.9926e-08	0.00100695	4.4001	3.69026e-06
NBAT1_PBOV1	62	434	4.39459e-09	0.000192014	4.17227	1.60314e-06
FOXA1_ZNF703	40	456	3.14379e-05	0.030611	4.14919	3.12281e-05
CASP7_PRL	40	456	4.08925e-05	0.0359133	3.79129	8.72948e-05
FASN_KLLN	32	464	1.83957e-06	0.0110919	3.63966	9.21612e-05
BCAS1_FHIT	201	295	1.45094e-05	0.0224424	3.13782	1.09314e-05
AKIP1_SUSD2	140	356	3.27185e-05	0.0309465	3.01308	2.15235e-05
MMP13_TNFSF11	458	38	2.42988e-08	0.000362781	0.228932	2.00679e-05

## Sheet: BMC_Cancer_mTP53_scc
gene_pair	group1	group2	p_value	fdr	gene_pair_hazard	gene_pair_p_value
BMP6_CAV1	15	246	2.88317e-08	0.000686216	9.74475	7.55468e-07
BMP6_TEK	15	246	3.11626e-08	0.000686216	9.7109	7.8992e-07
BMP6_PAK1	18	243	1.36902e-06	0.0118262	8.06891	6.40965e-06
BMP6_GSN	13	248	3.22233e-06	0.0118262	8.0582	1.52441e-05
BMP6_TIMP4	14	247	3.22233e-06	0.0118262	8.0582	1.52441e-05
BMP6_ST14	15	246	3.22233e-06	0.0118262	8.0582	1.52441e-05
BMP6_EPCAM	16	245	1.45404e-05	0.0337038	7.09293	4.68554e-05
BMP6_KDR	20	241	1.40517e-05	0.0337038	6.65811	2.57382e-05
BMP6_SRC	22	239	2.10493e-06	0.0118262	5.77385	5.08392e-06
CASP9_ST8SIA6-AS1	117	144	6.85609e-07	0.010065	5.39133	1.32605e-05
BMP1_MDM2	70	191	5.19604e-06	0.0163456	4.77318	7.68795e-06
DIRC3_MEG3	60	201	4.52556e-06	0.0153315	4.47633	1.51799e-05
BMP6_E2F1	232	29	2.32149e-05	0.048686	0.181363	3.77388e-05
BMP6_MMP11	234	27	6.03223e-06	0.017711	0.166152	1.36452e-05
BMP6_LSINCT5	230	31	6.97895e-06	0.01808	0.165083	1.47458e-05
BMP6_CYCS	241	20	6.88566e-06	0.01808	0.145939	2.33045e-05
